# Supplementary material
Source: PubMed Central journal article supplement (PMC4076021)

9a - <sup>1</sup>H NMR

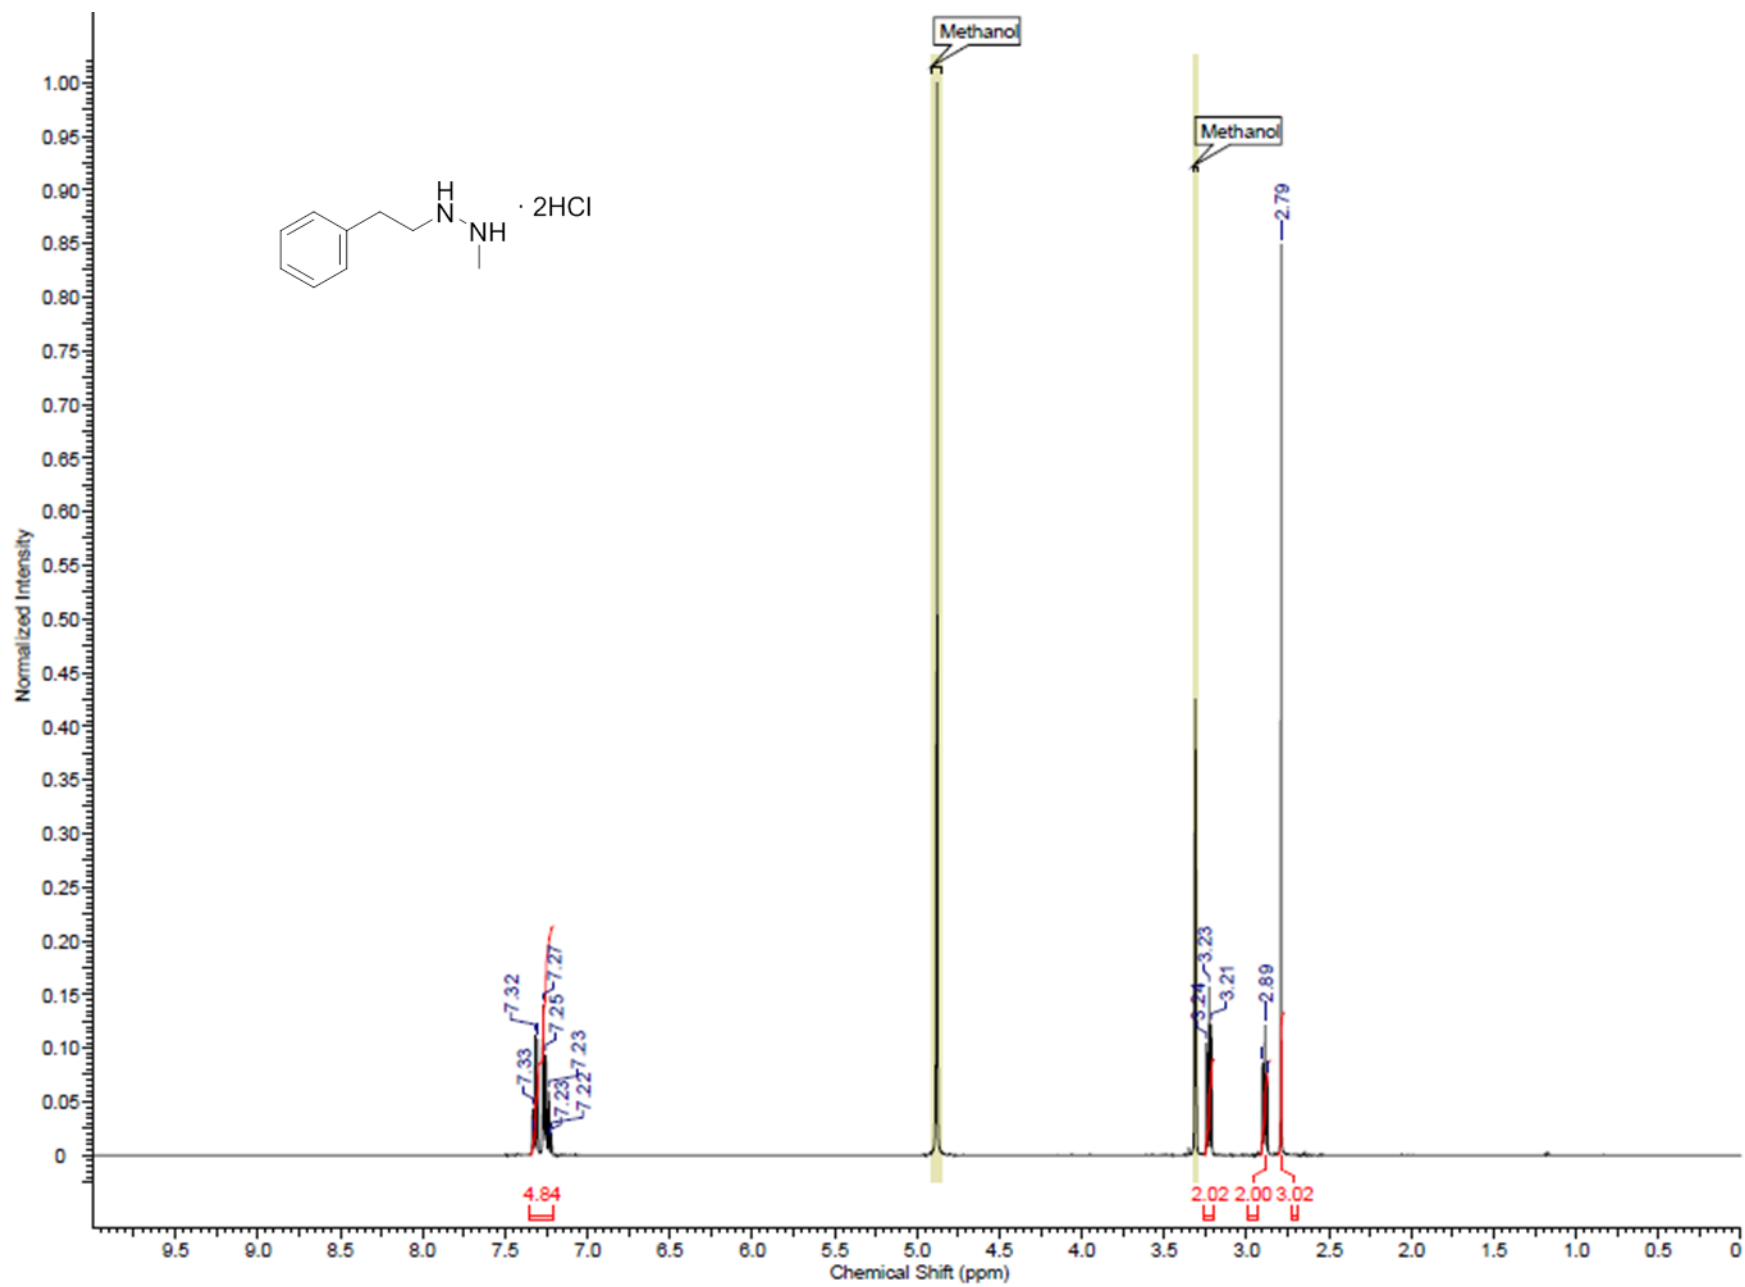

9a -  $^{13}\text{C}$  NMR

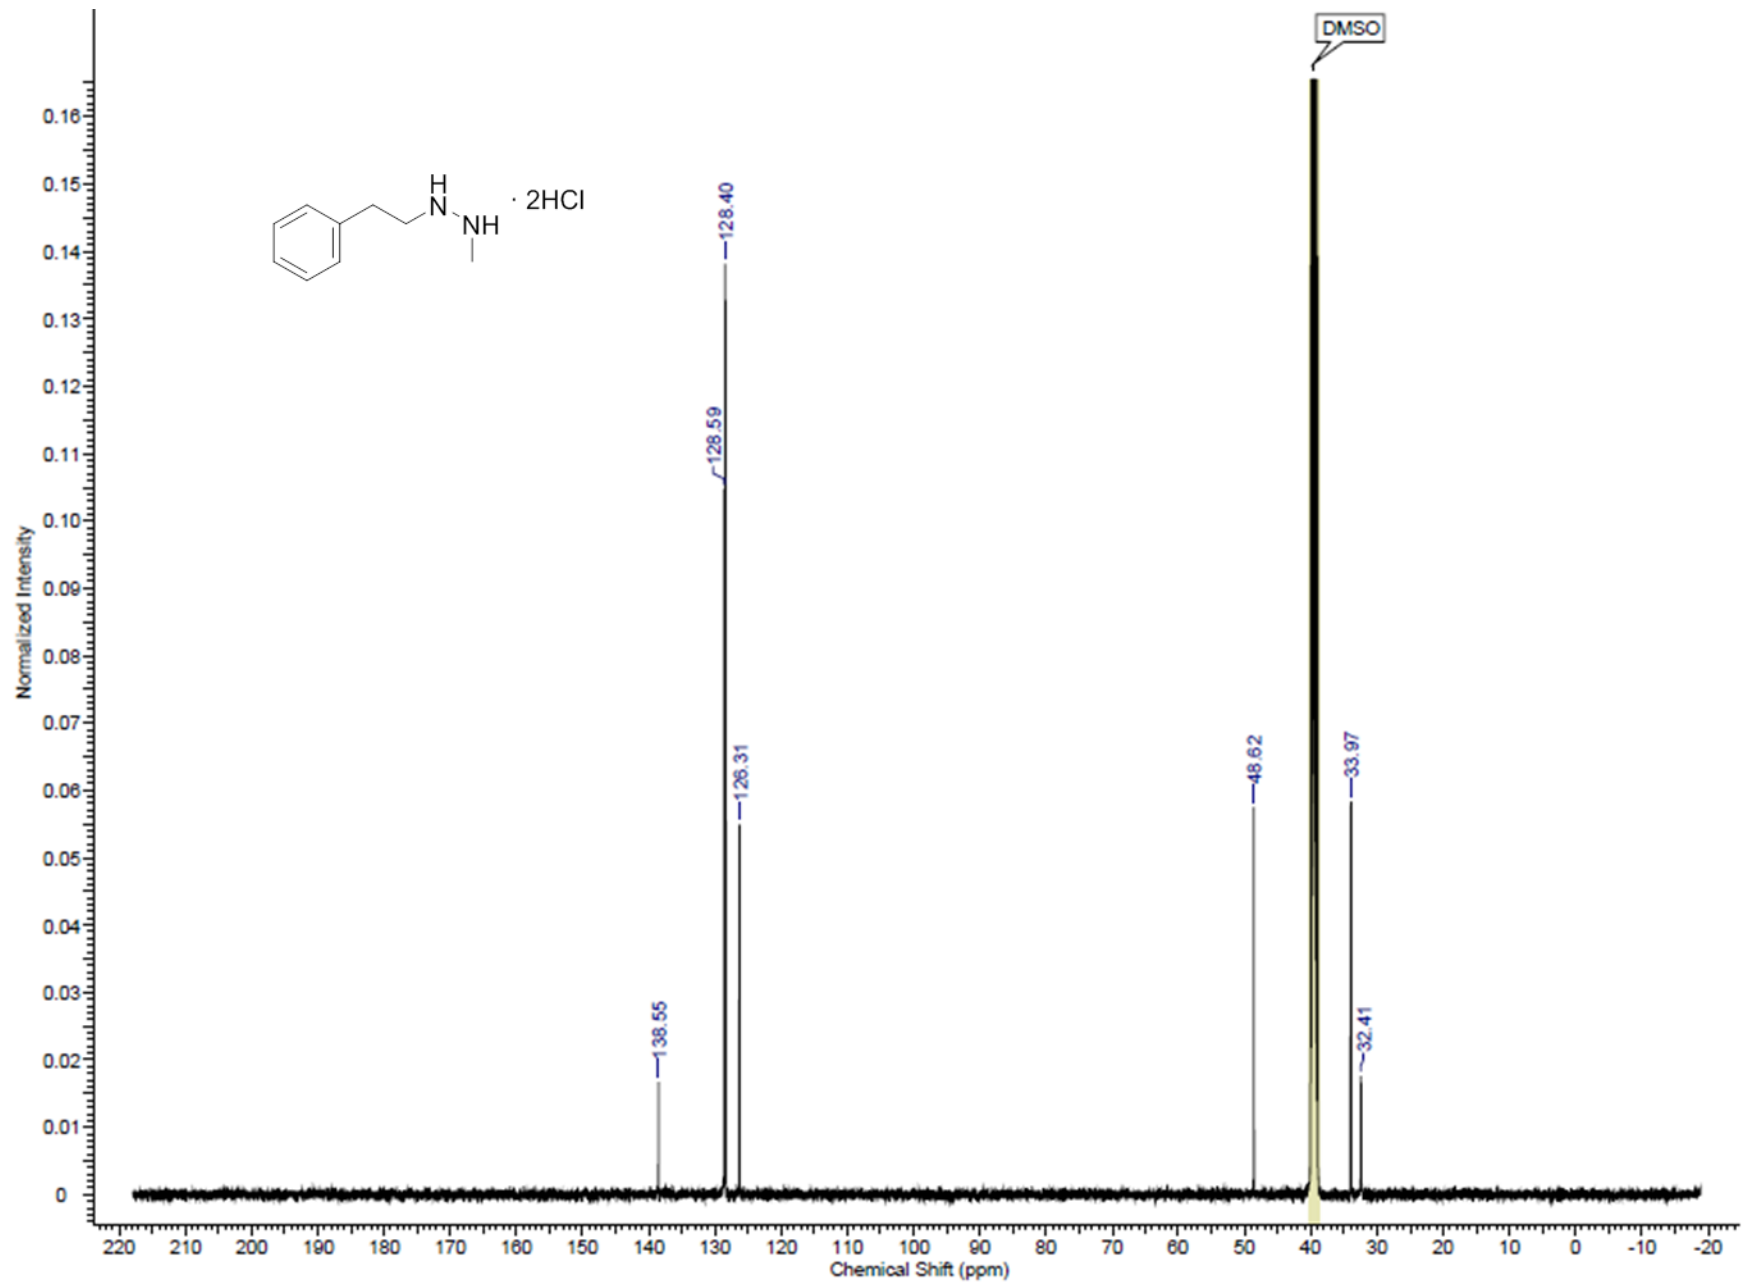

9b -  $^1\text{H}$  NMR

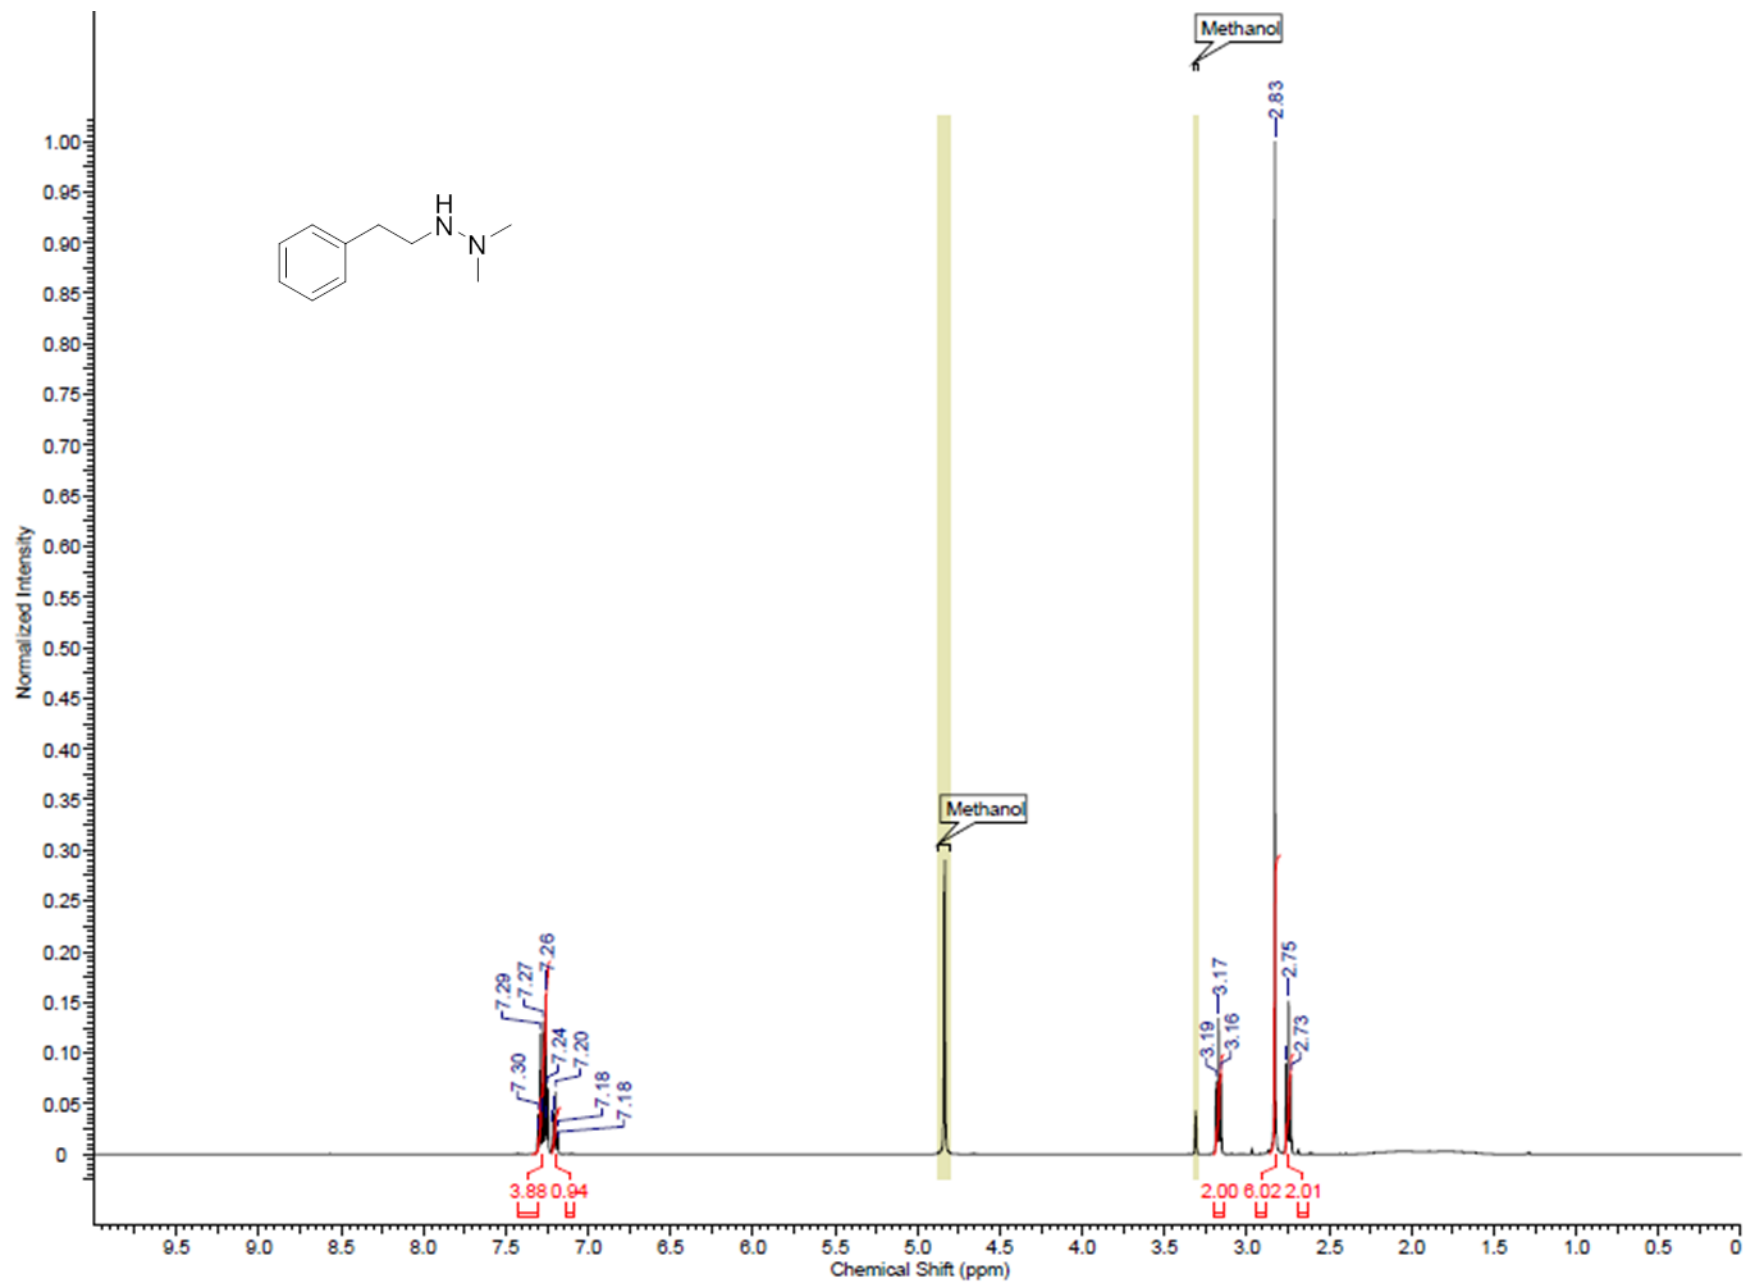

9b -  $^{13}\text{C}$  NMR

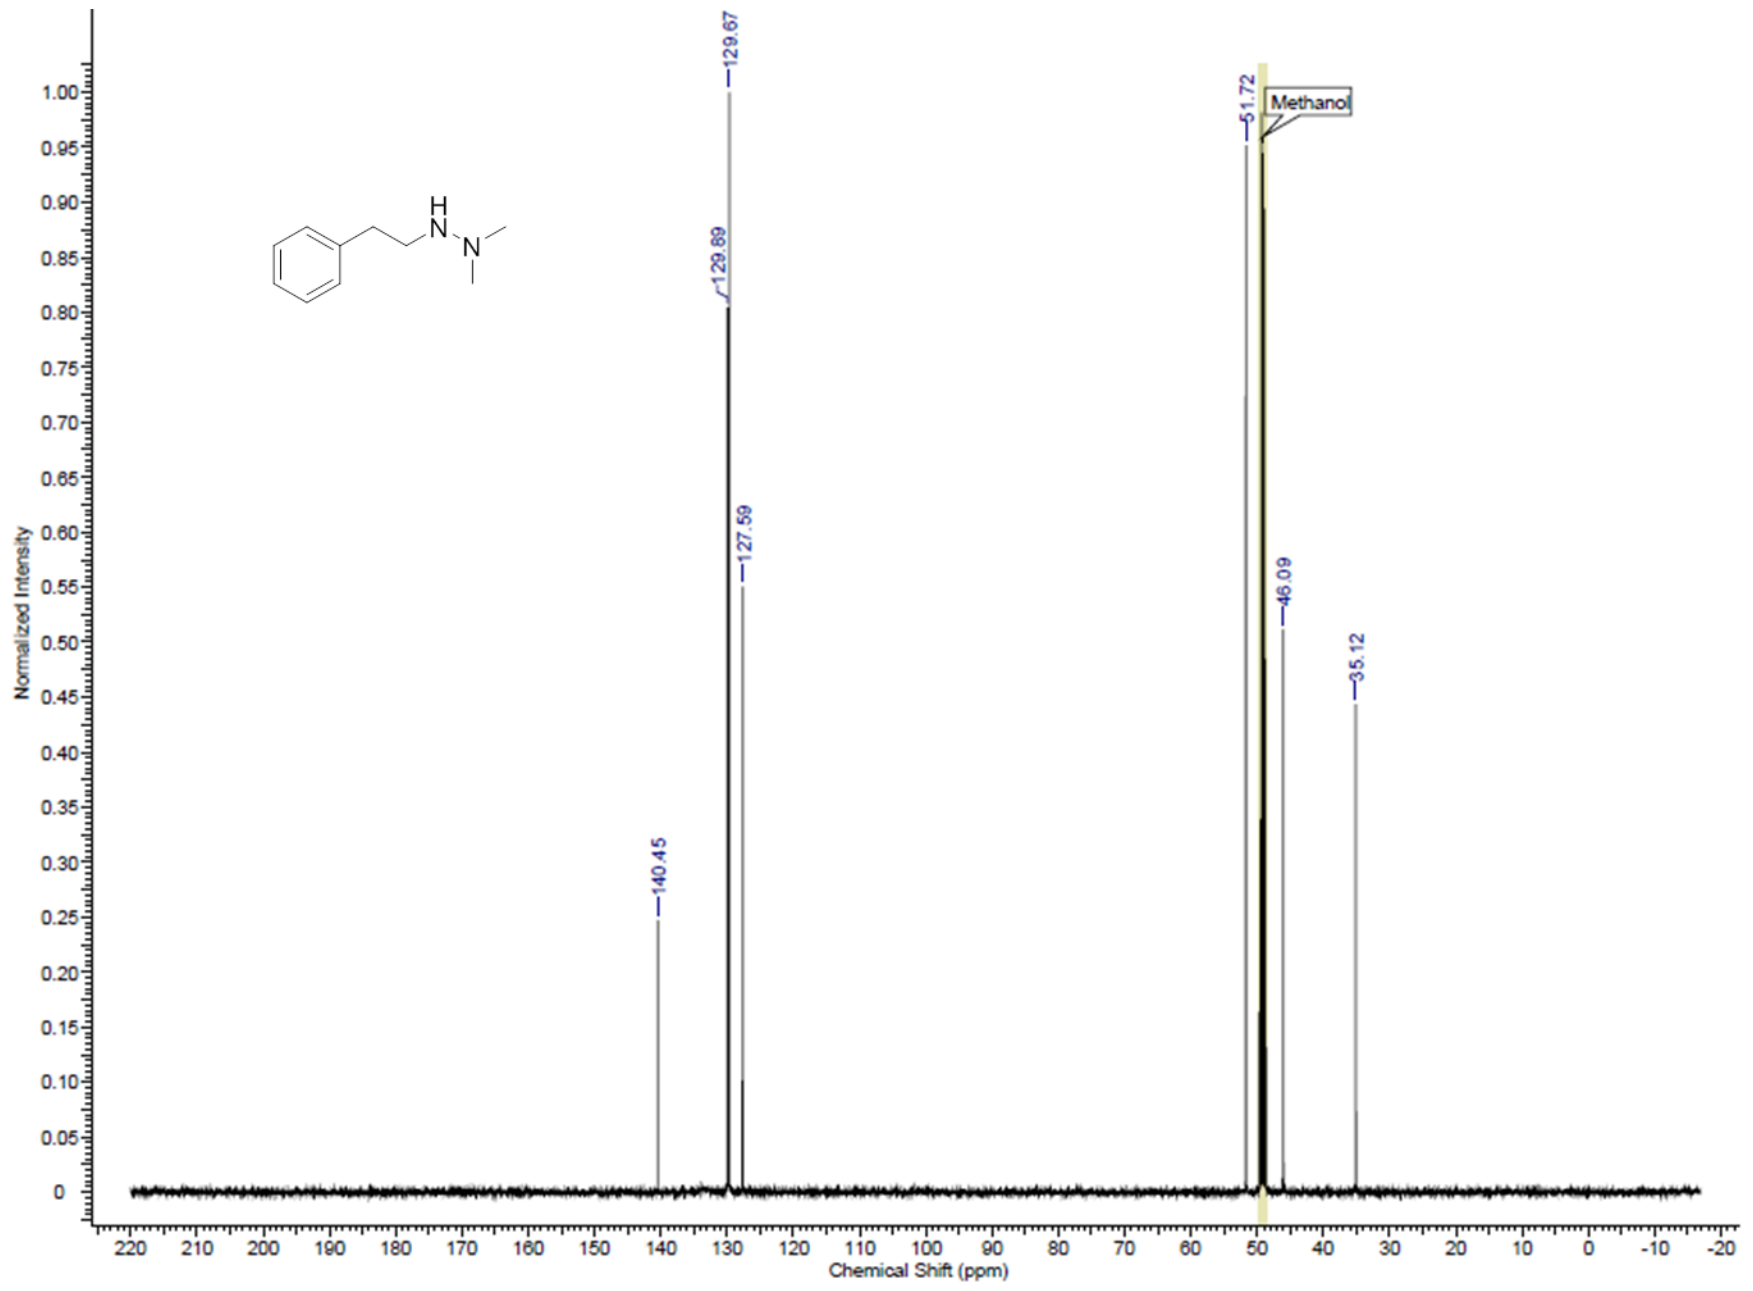

9c -  $^1\text{H}$  NMR

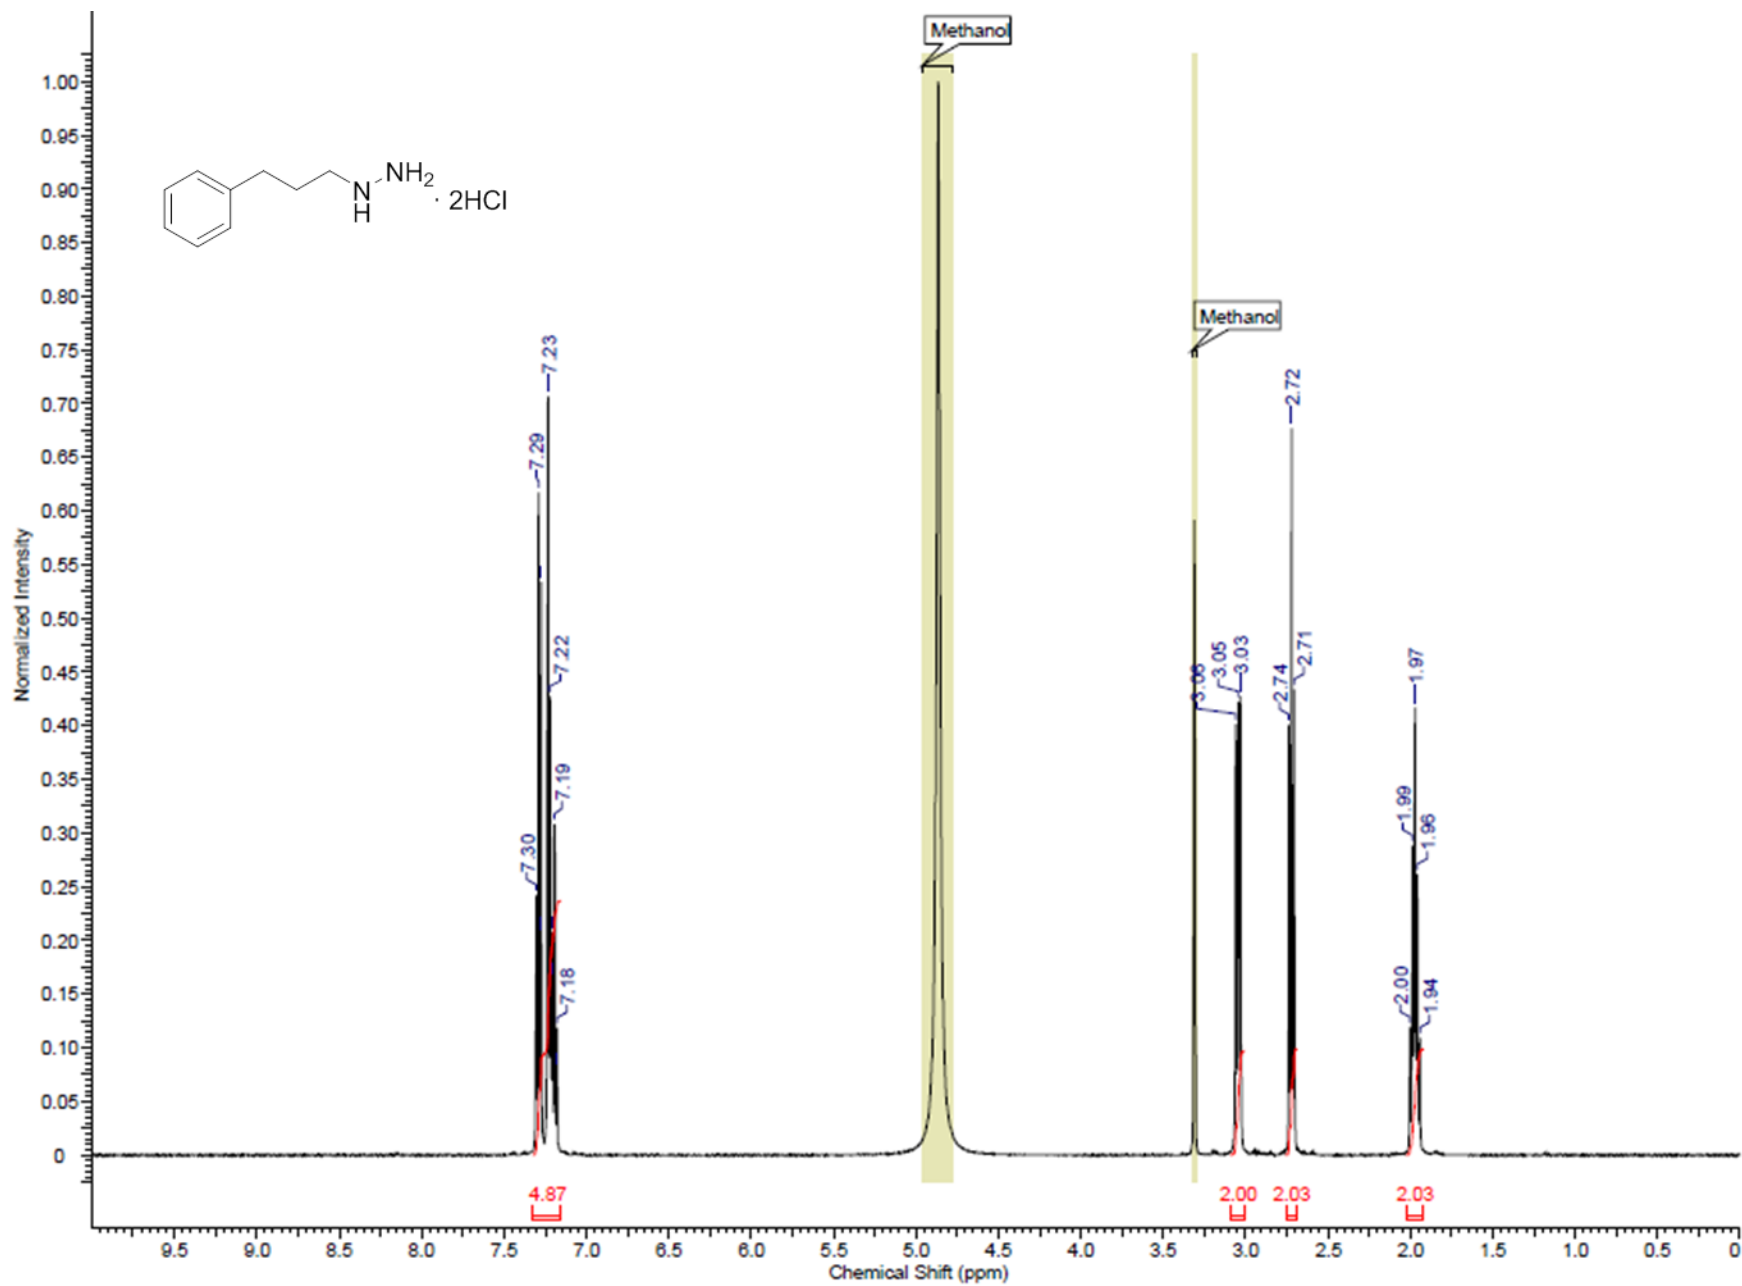

9c -  $^{13}\text{C}$  NMR

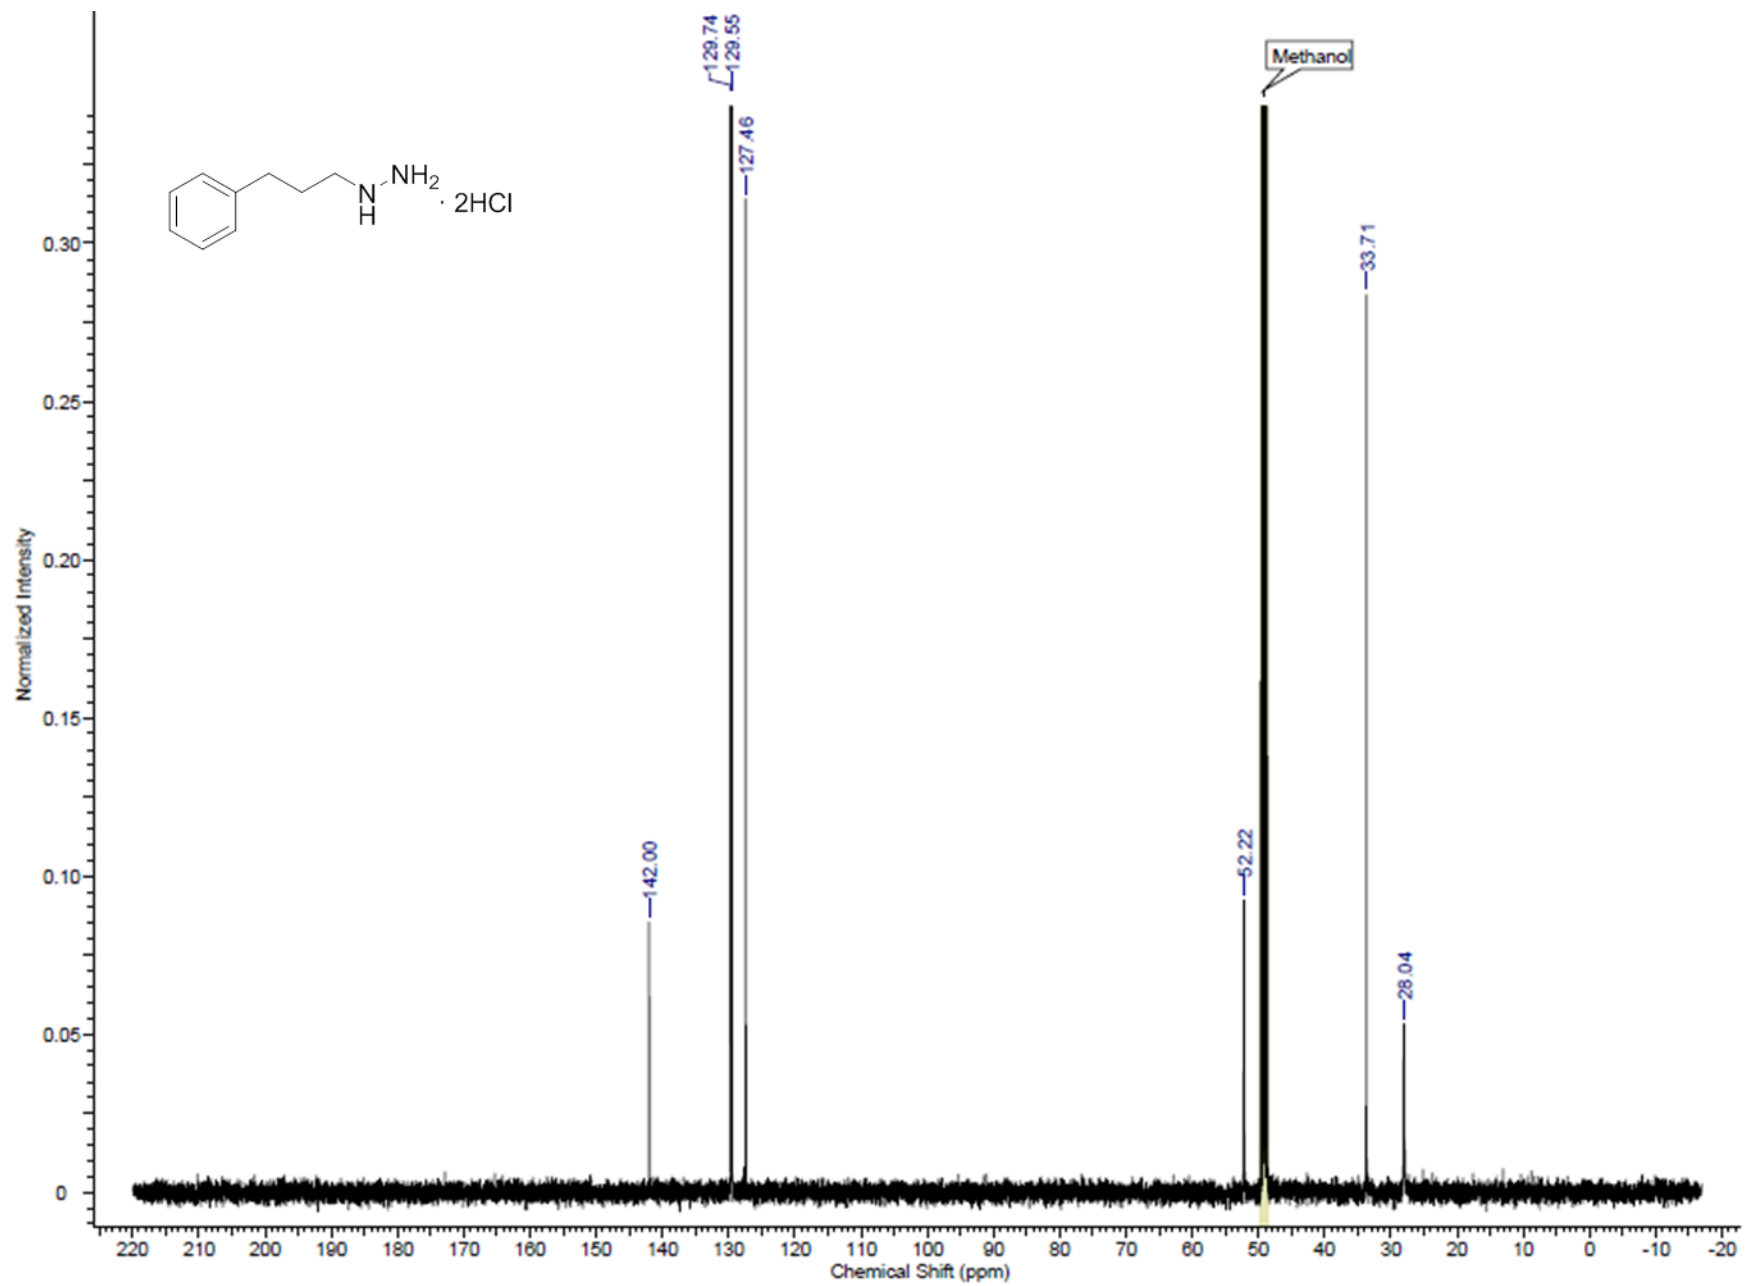

9d - <sup>1</sup>H NMR

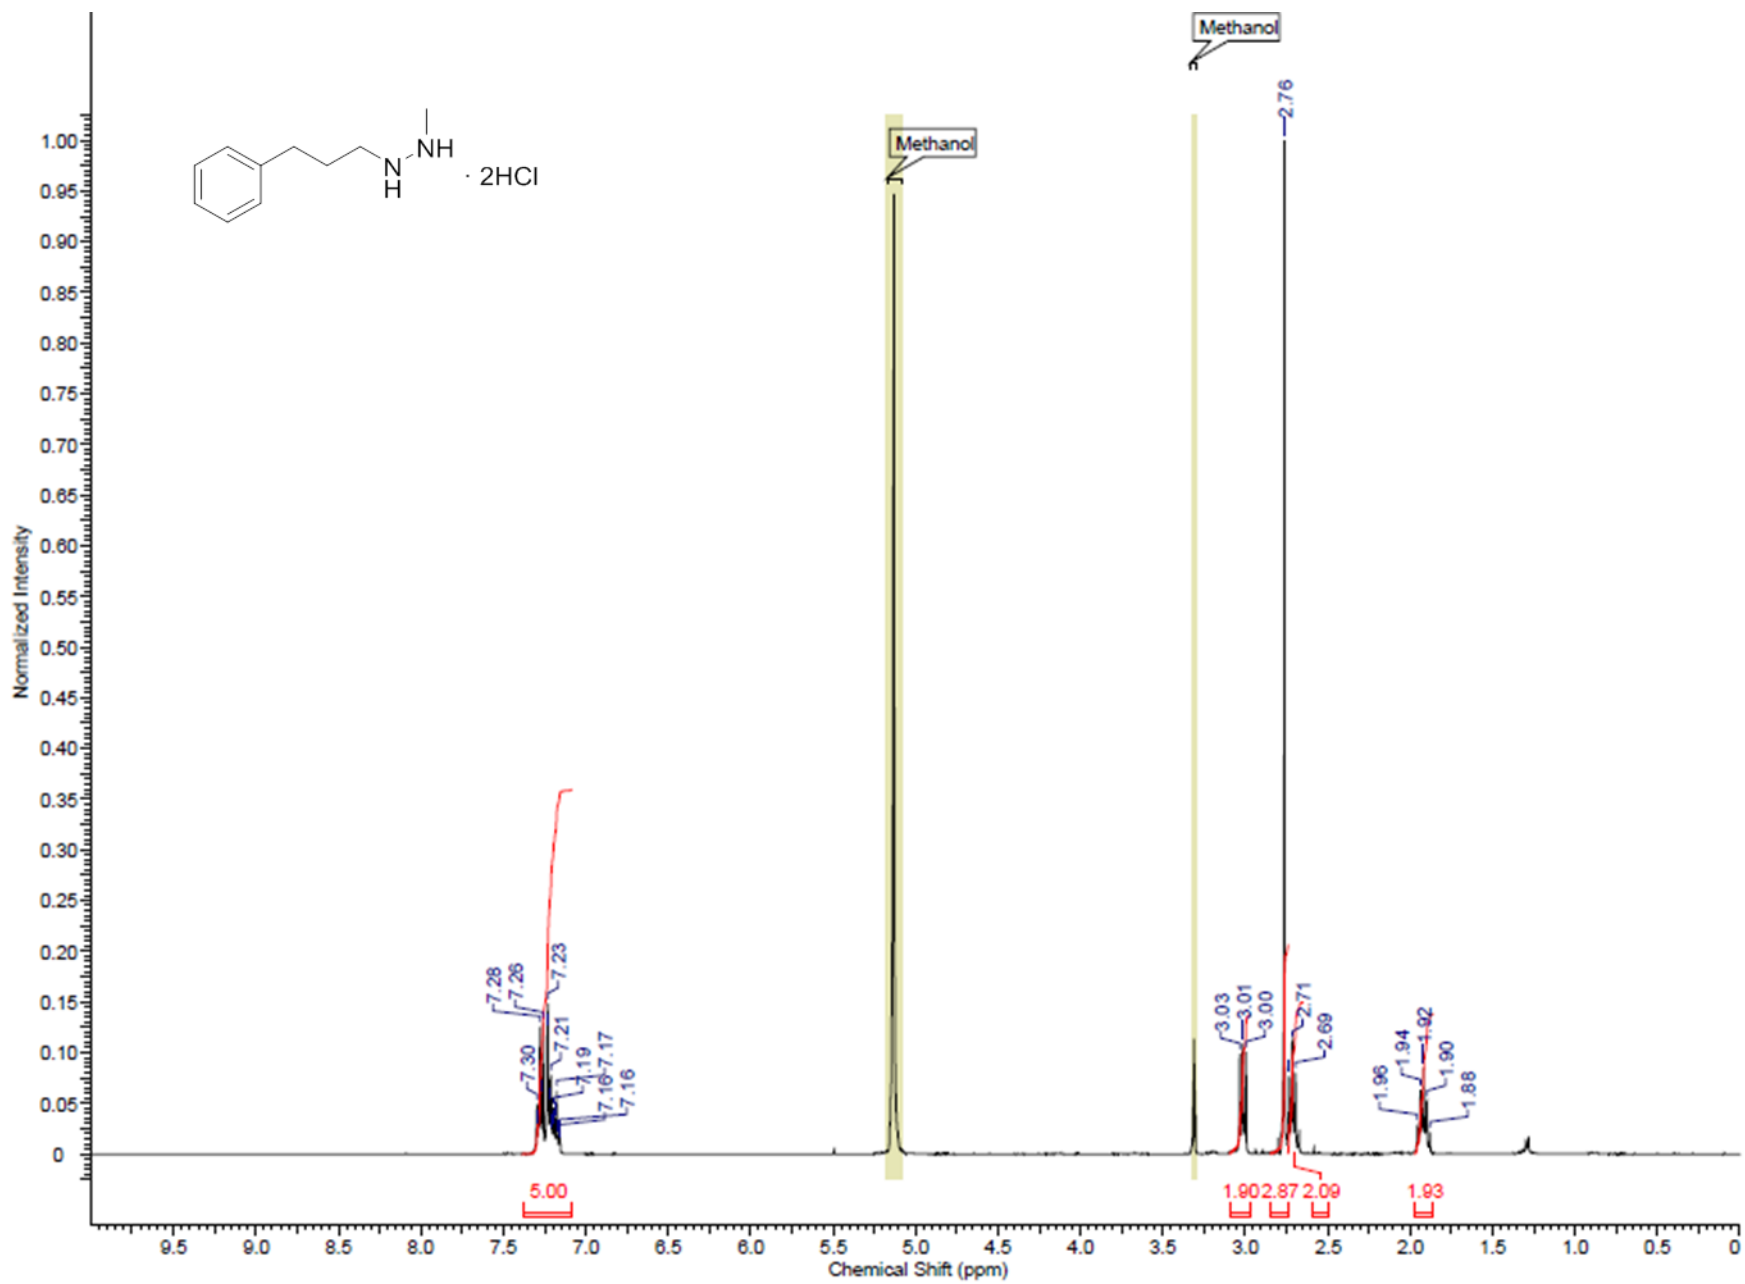

9d -  $^{13}\text{C}$  NMR

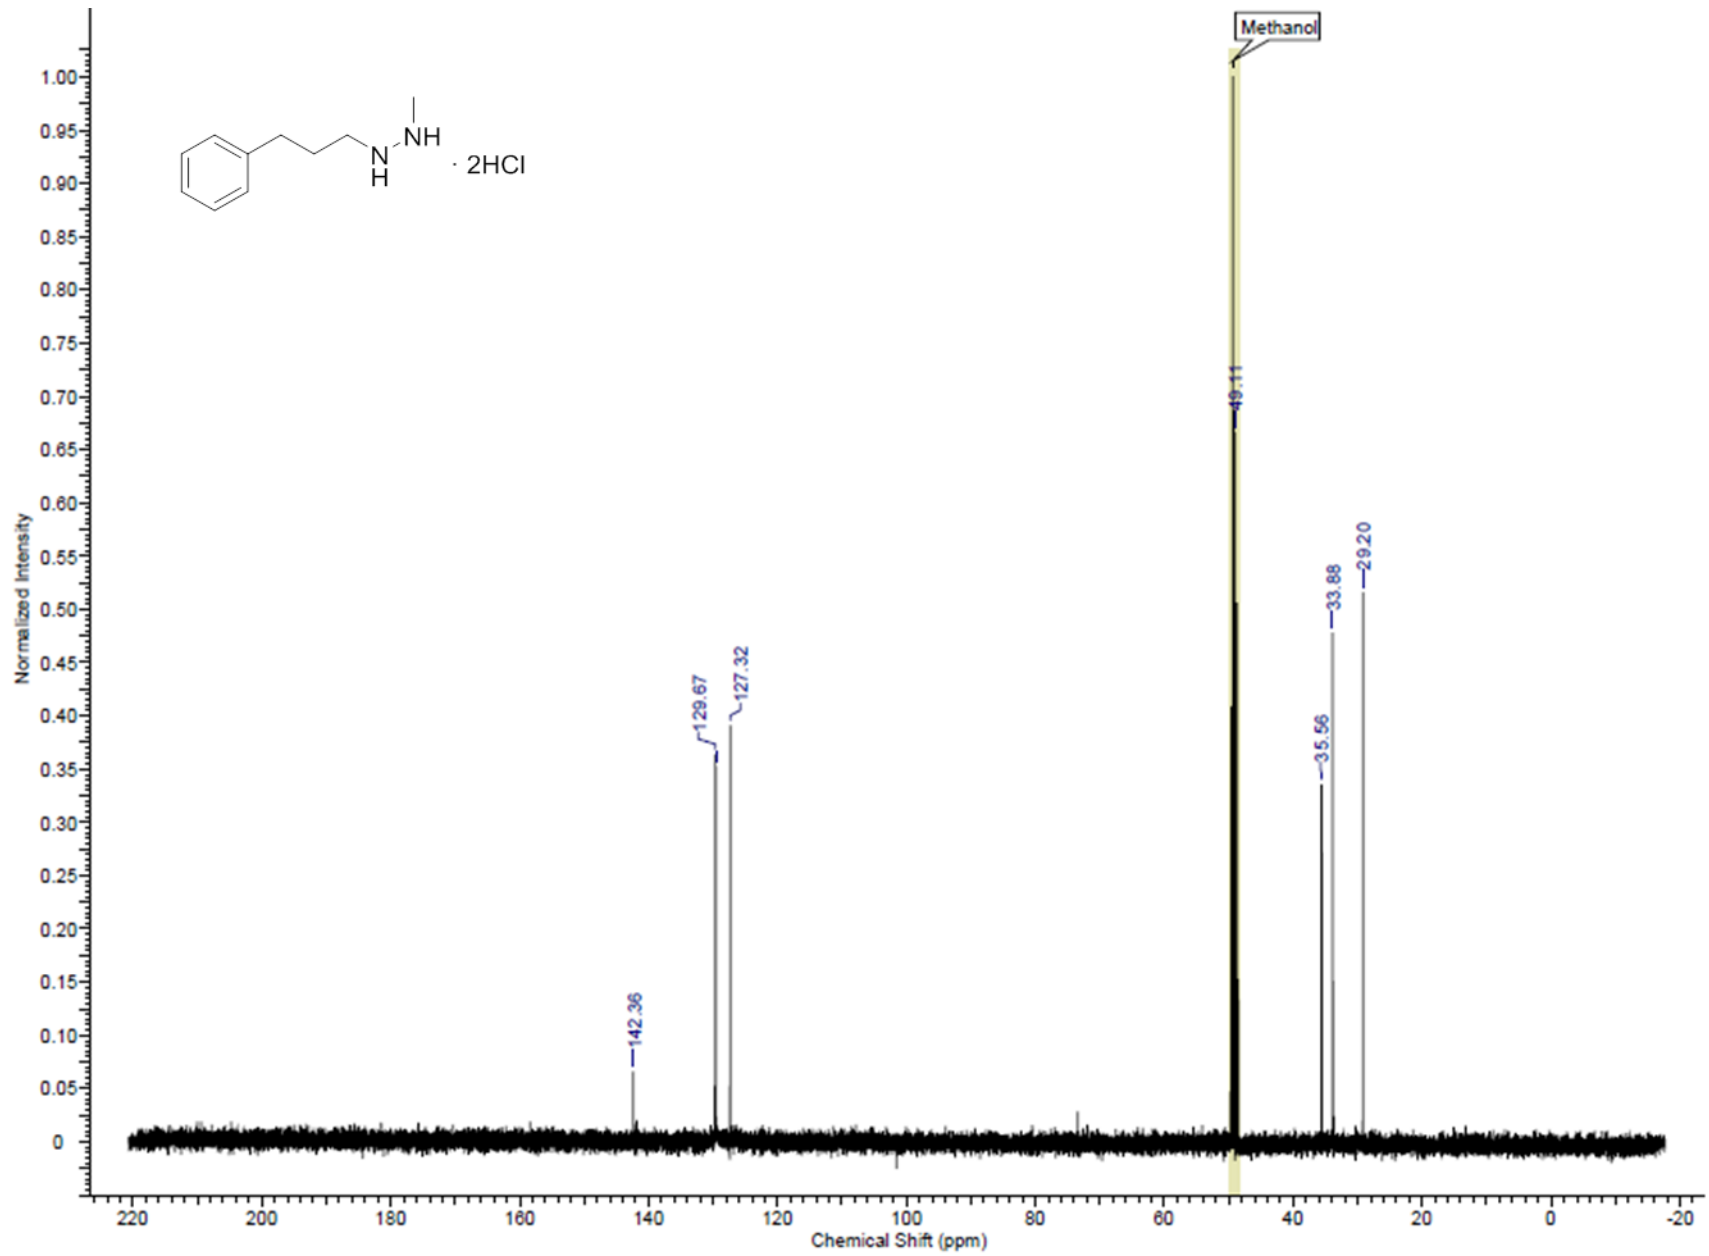



9e -  $^1\text{H}$  NMR

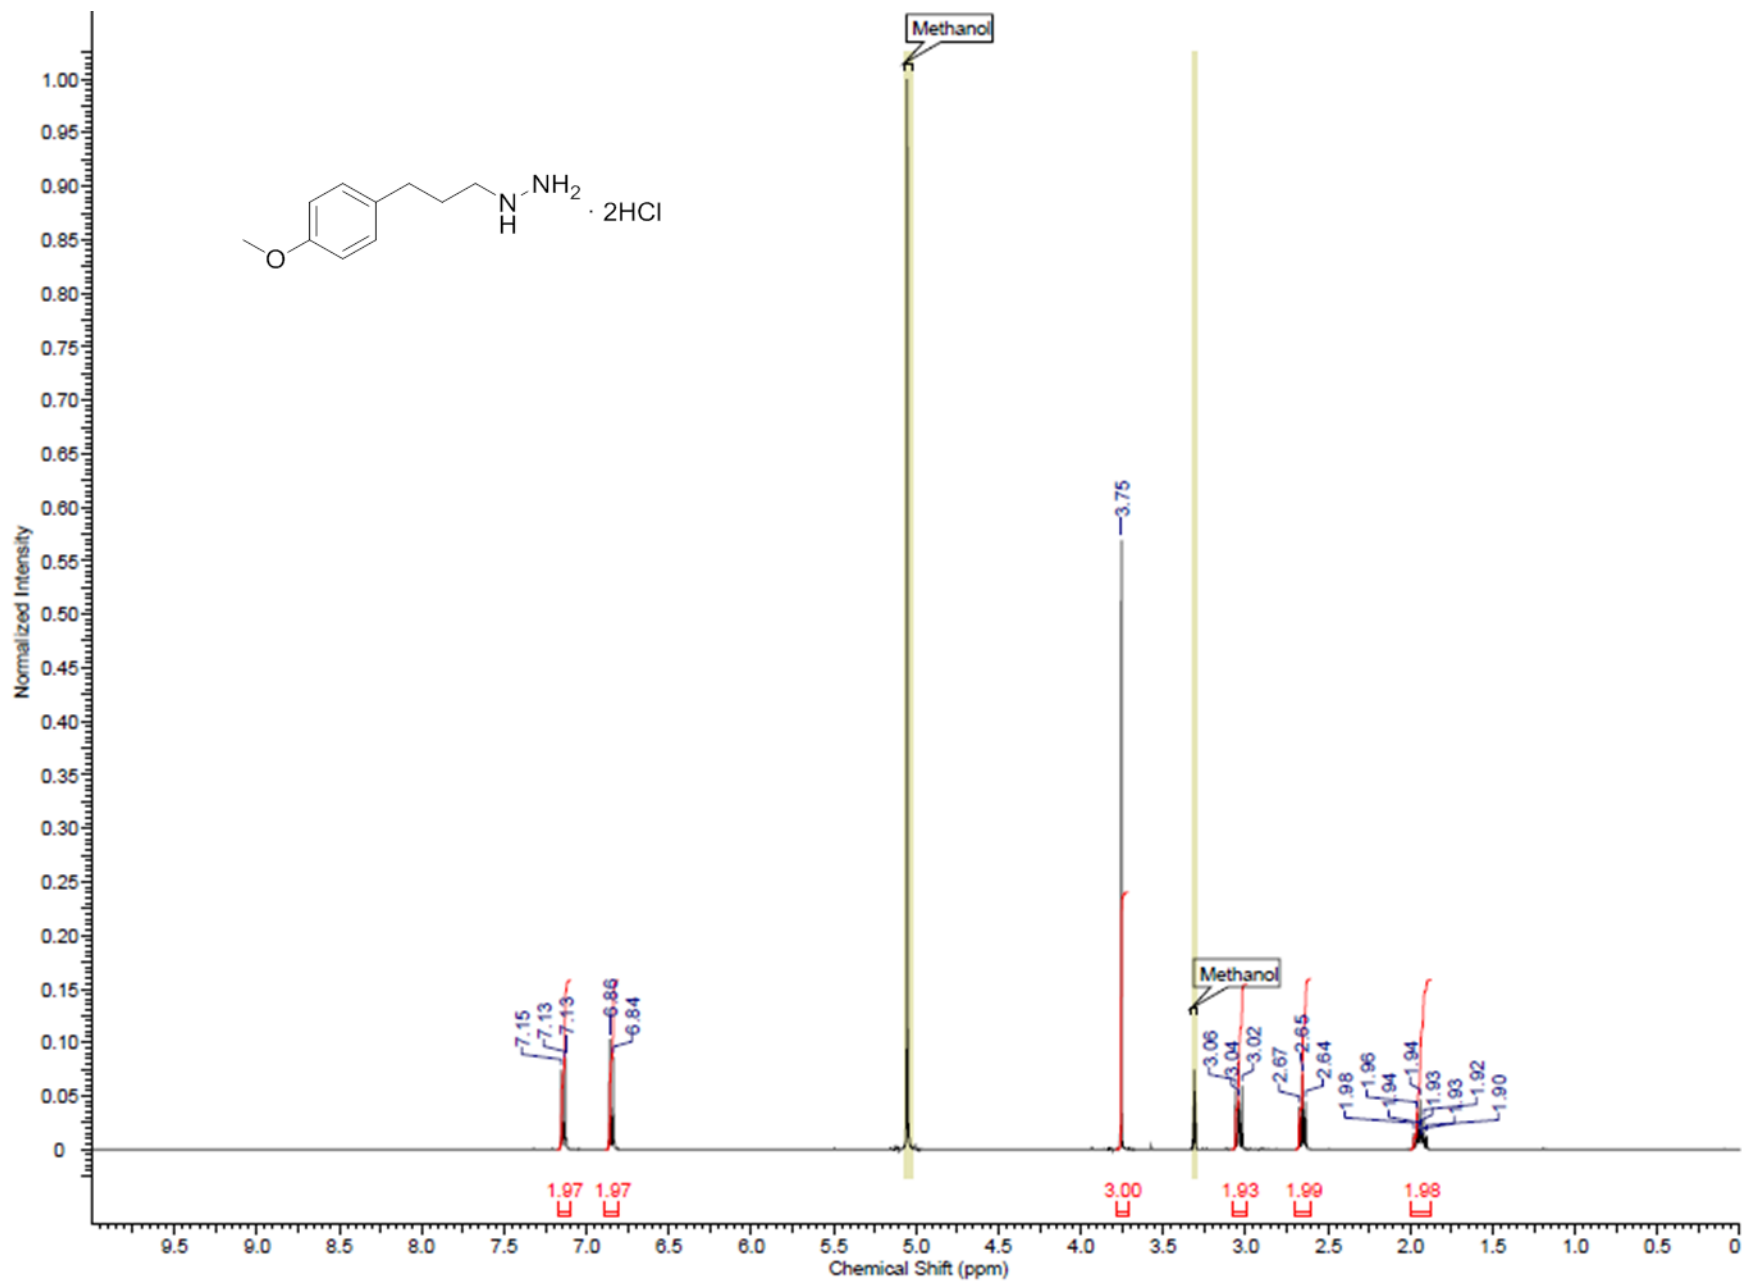

9f - <sup>1</sup>H NMR

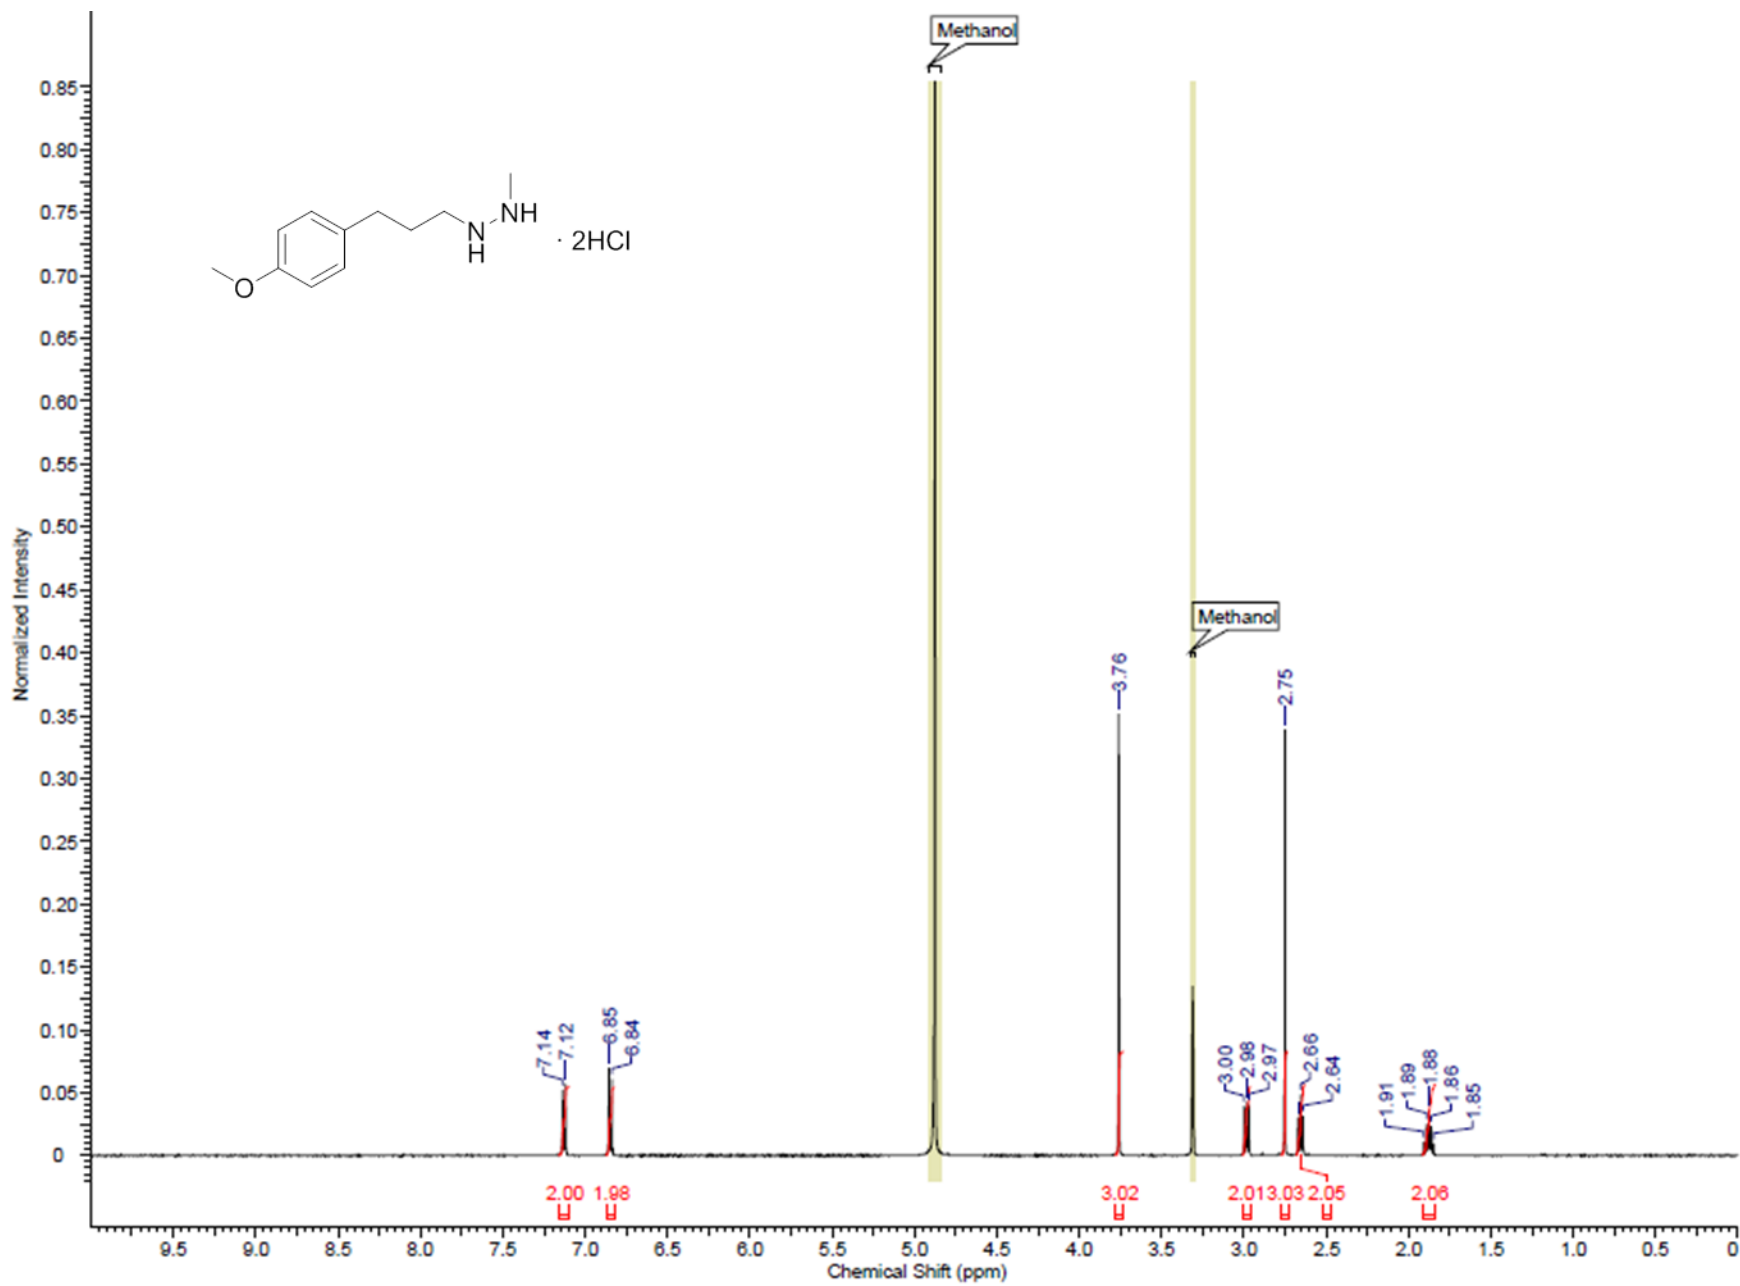

9f - <sup>13</sup>C NMR

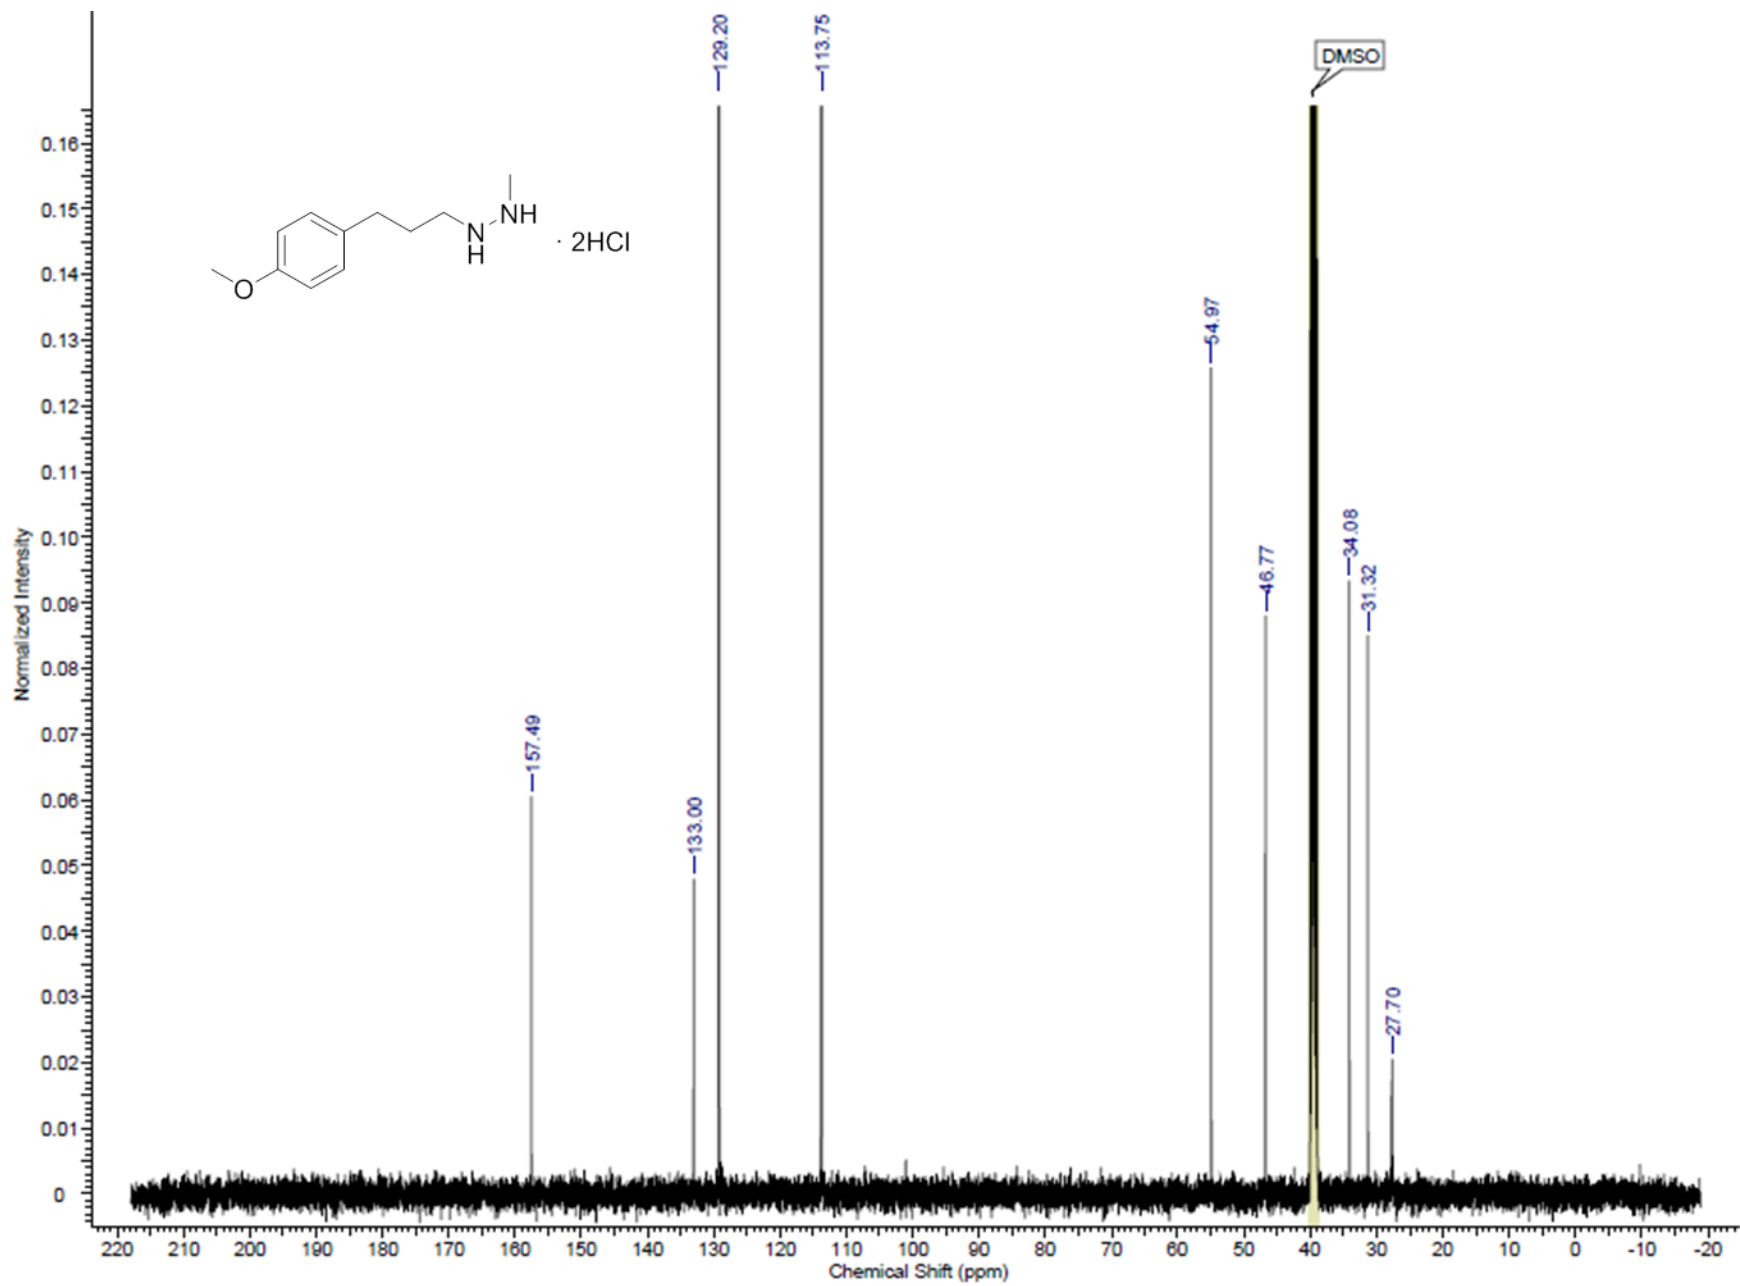

9g -  $^1\text{H}$  NMR

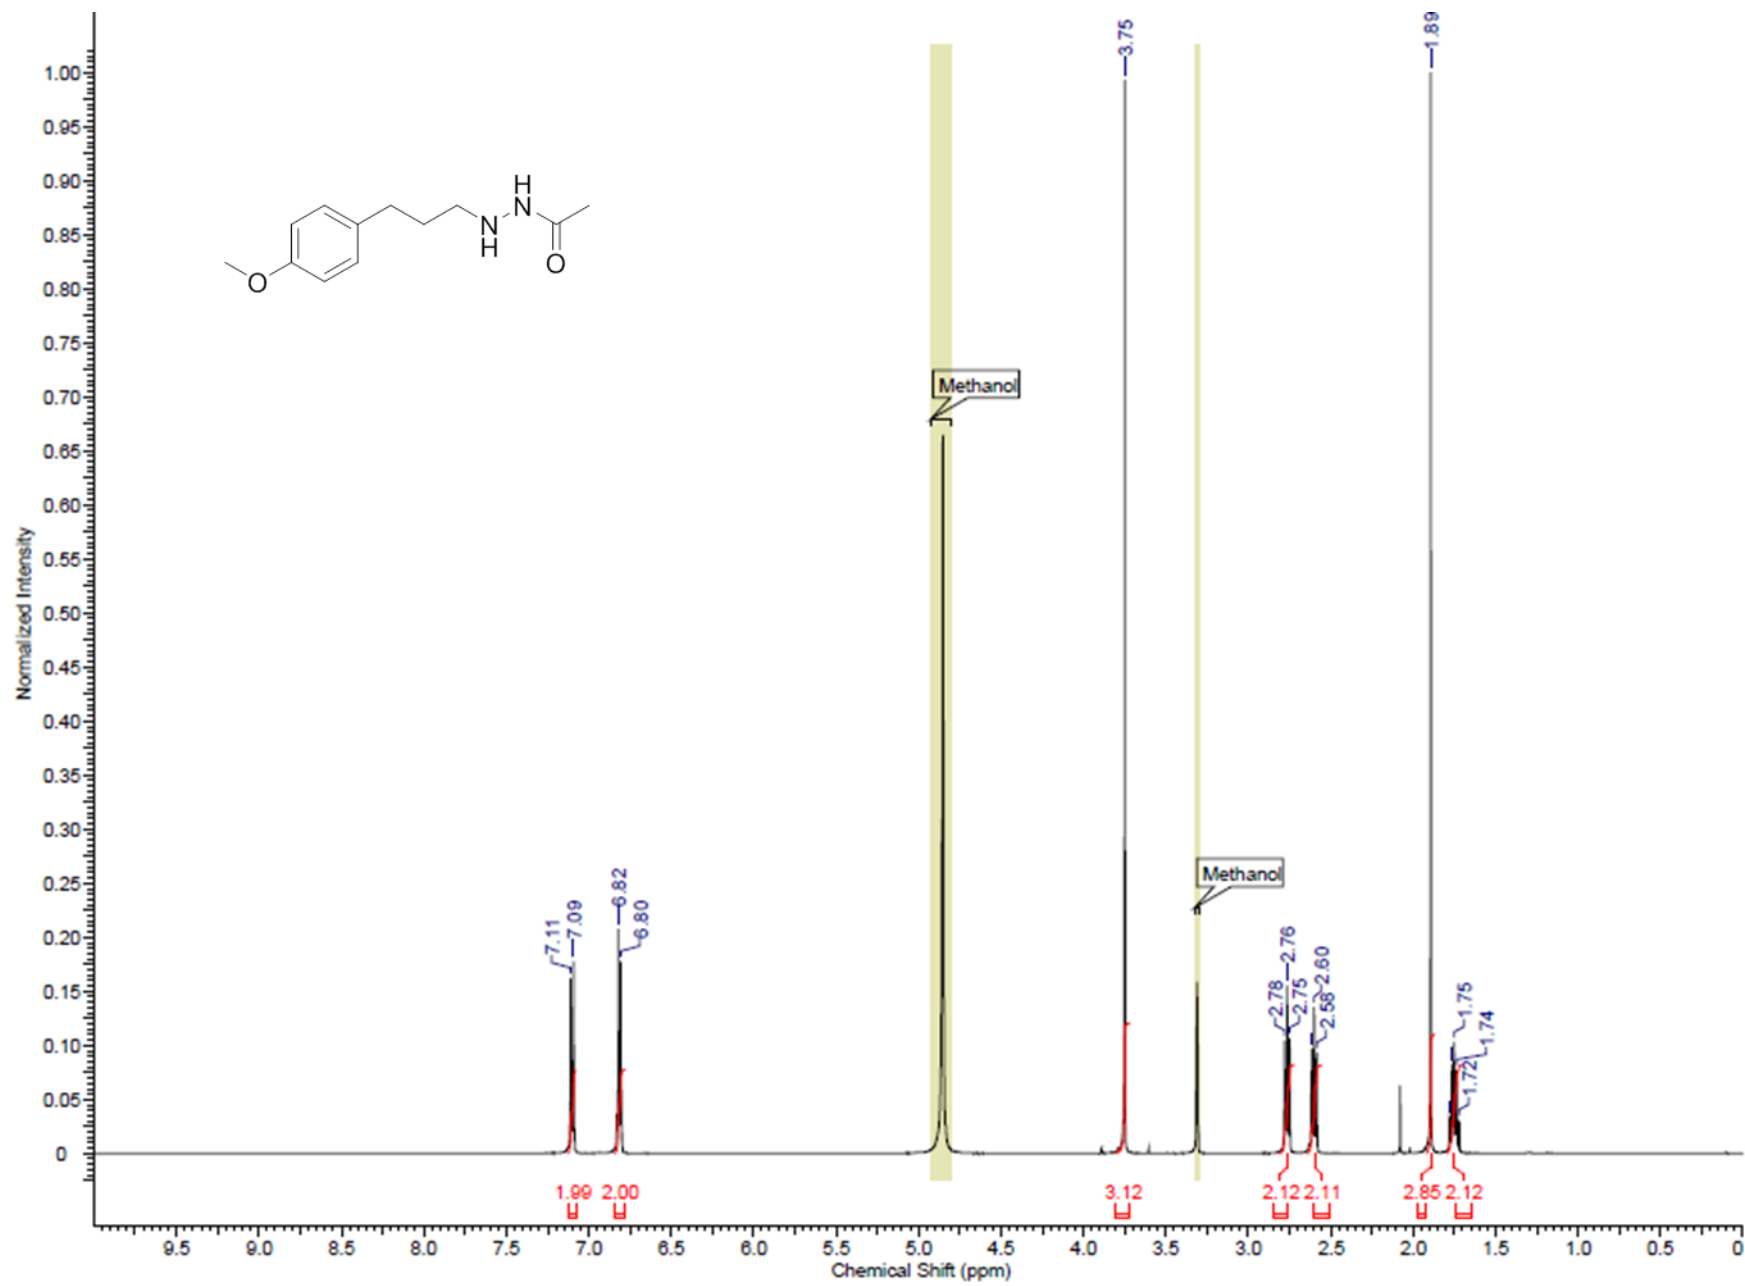

9g -  $^{13}\text{C}$  NMR

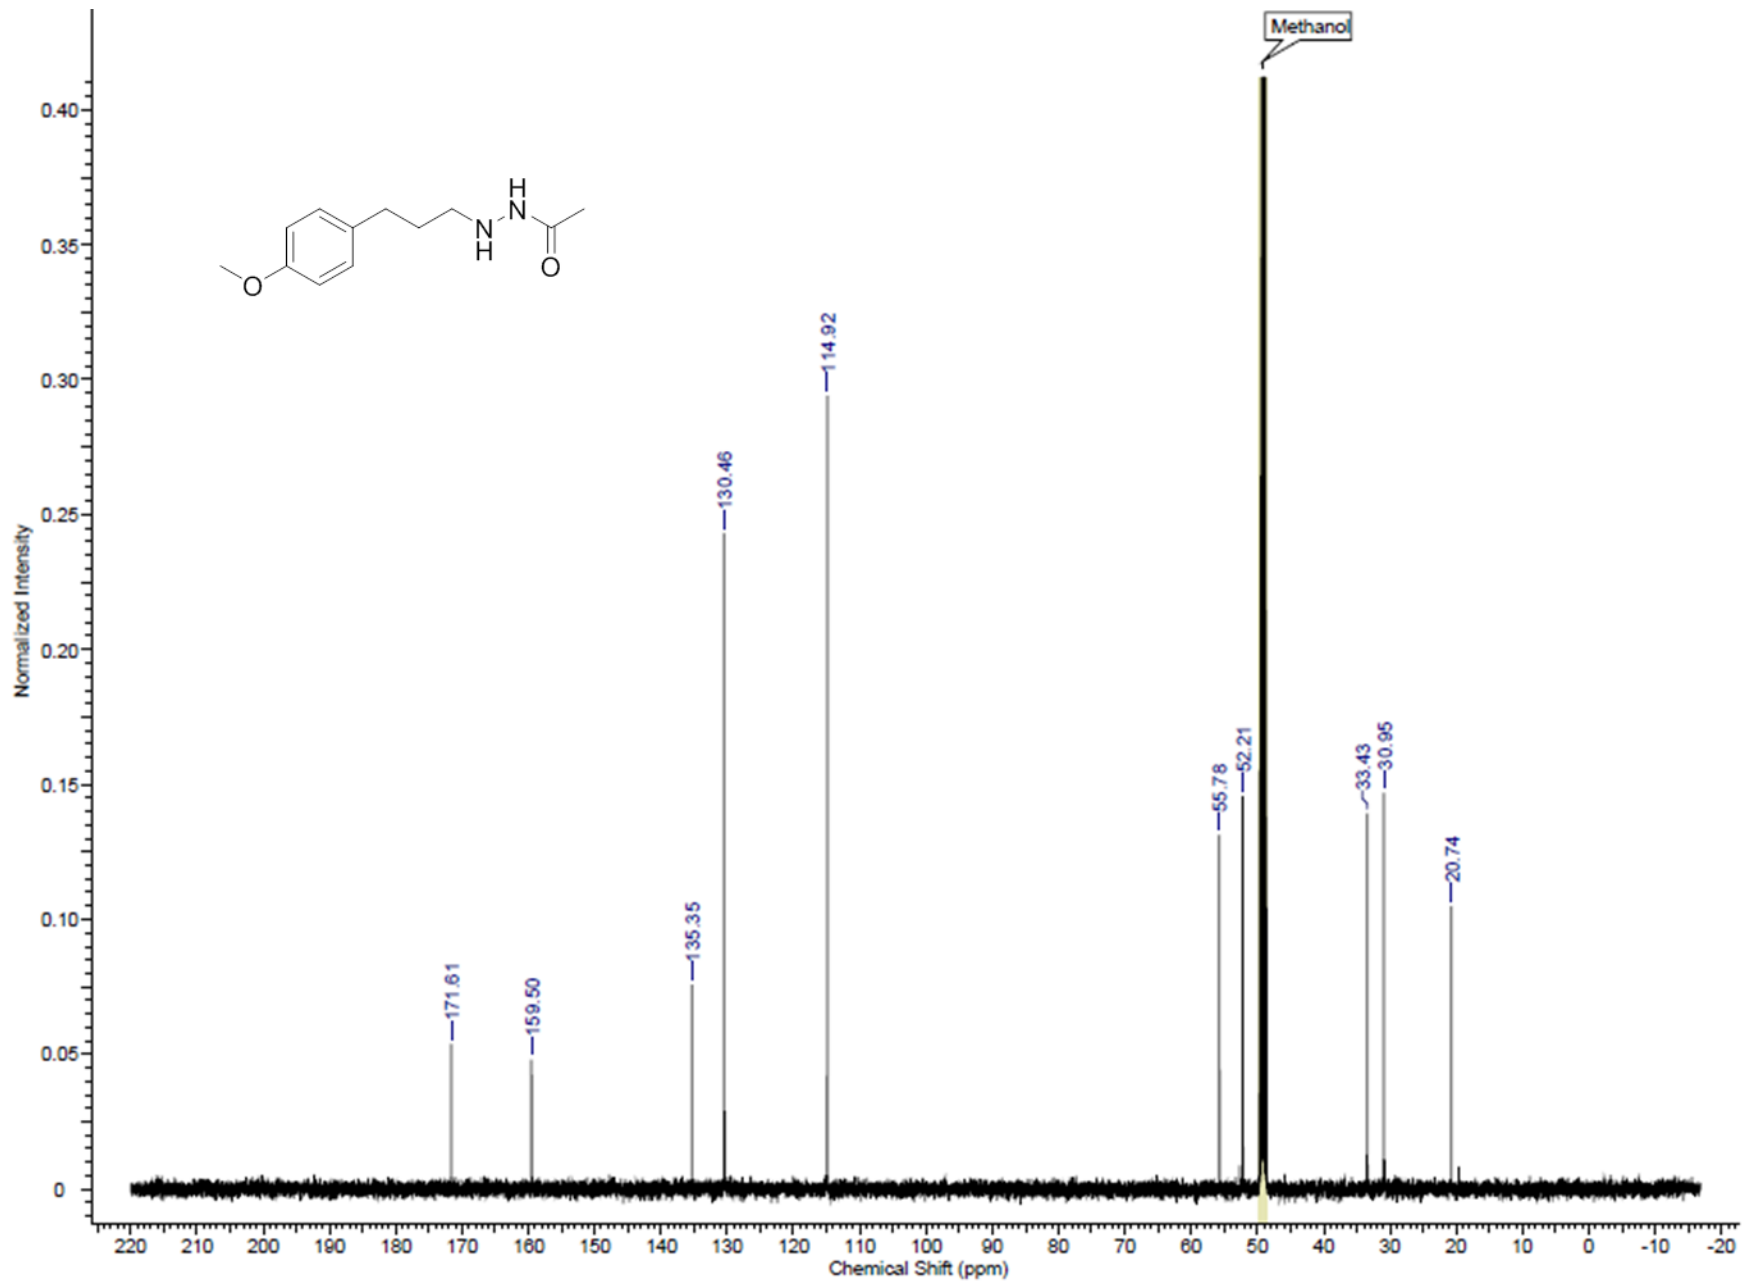

9h - <sup>1</sup>H NMR

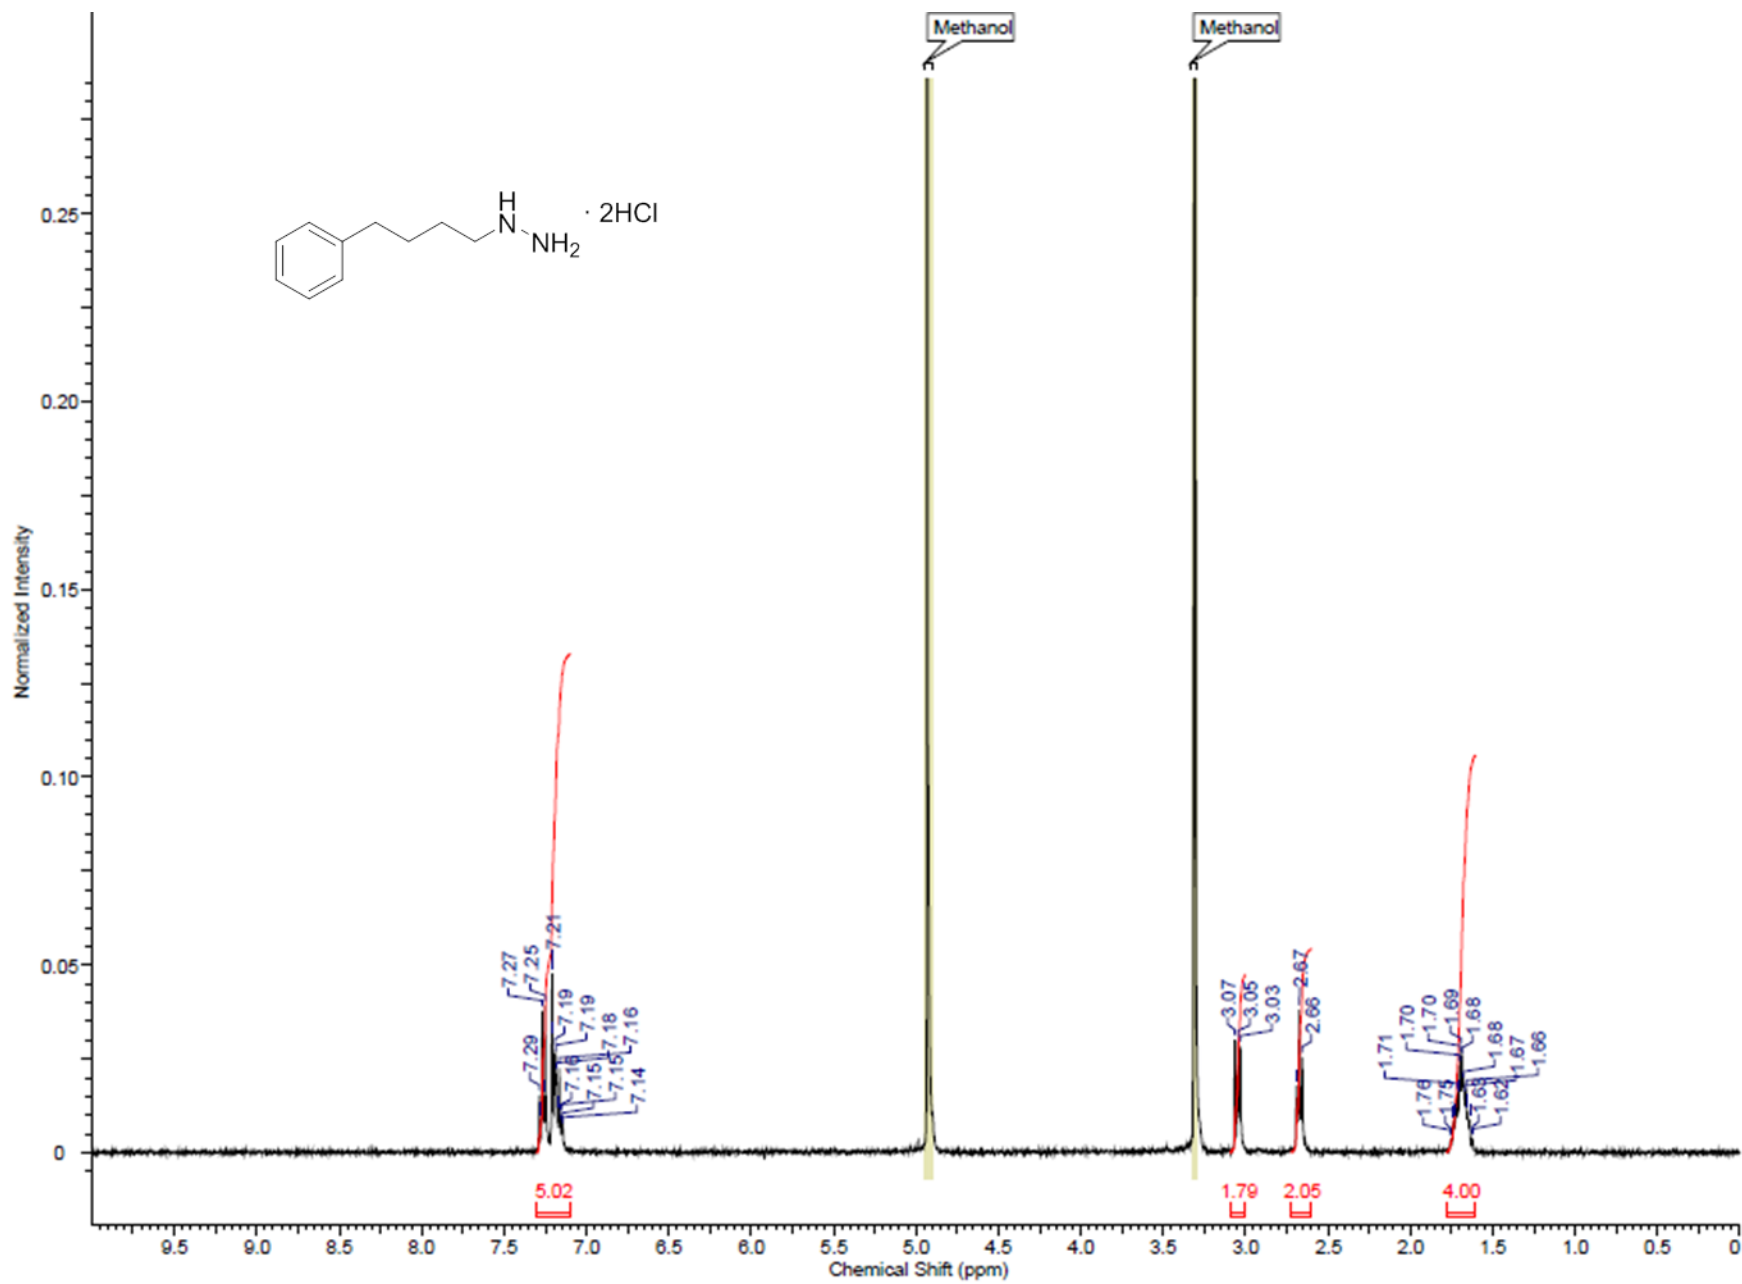

10a -  $^1\text{H}$  NMR

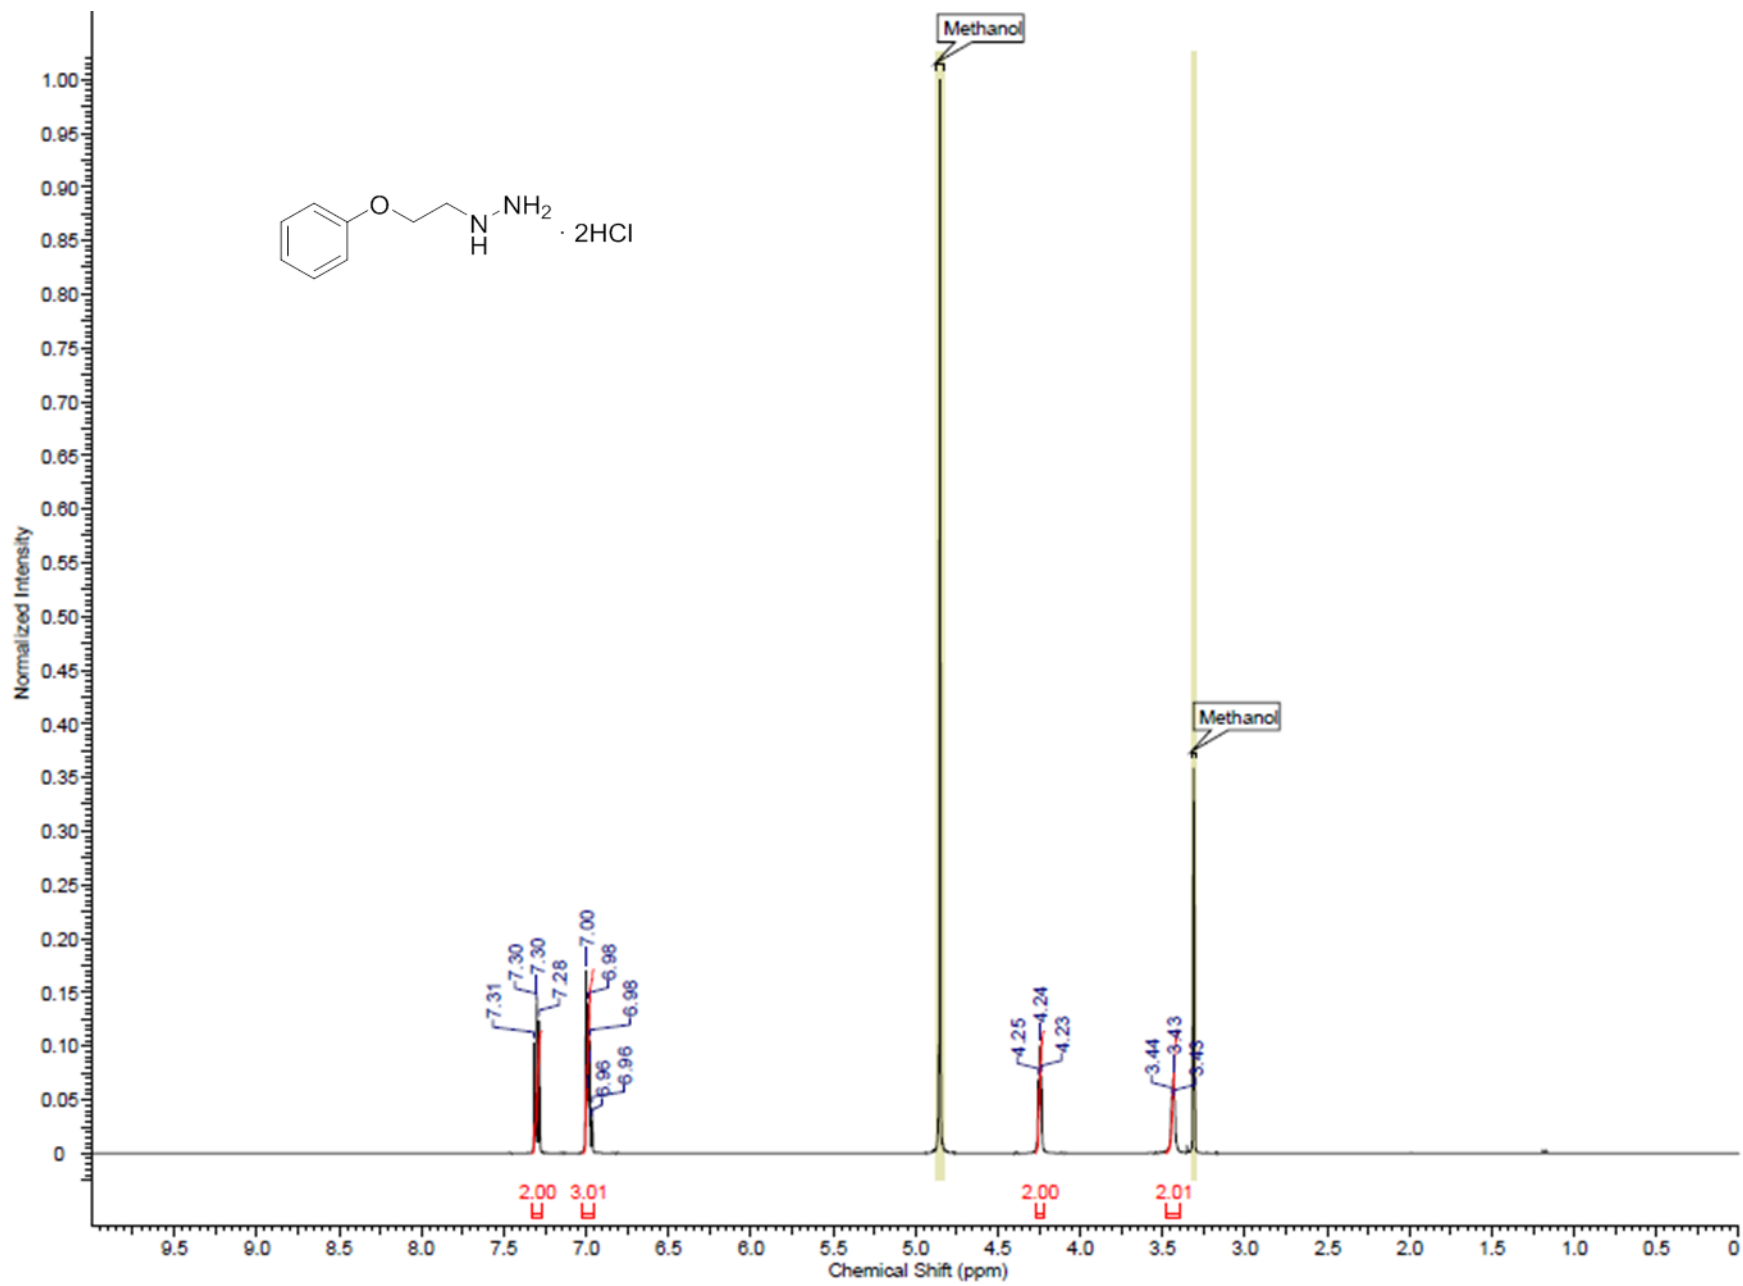

10a - <sup>13</sup>C NMR

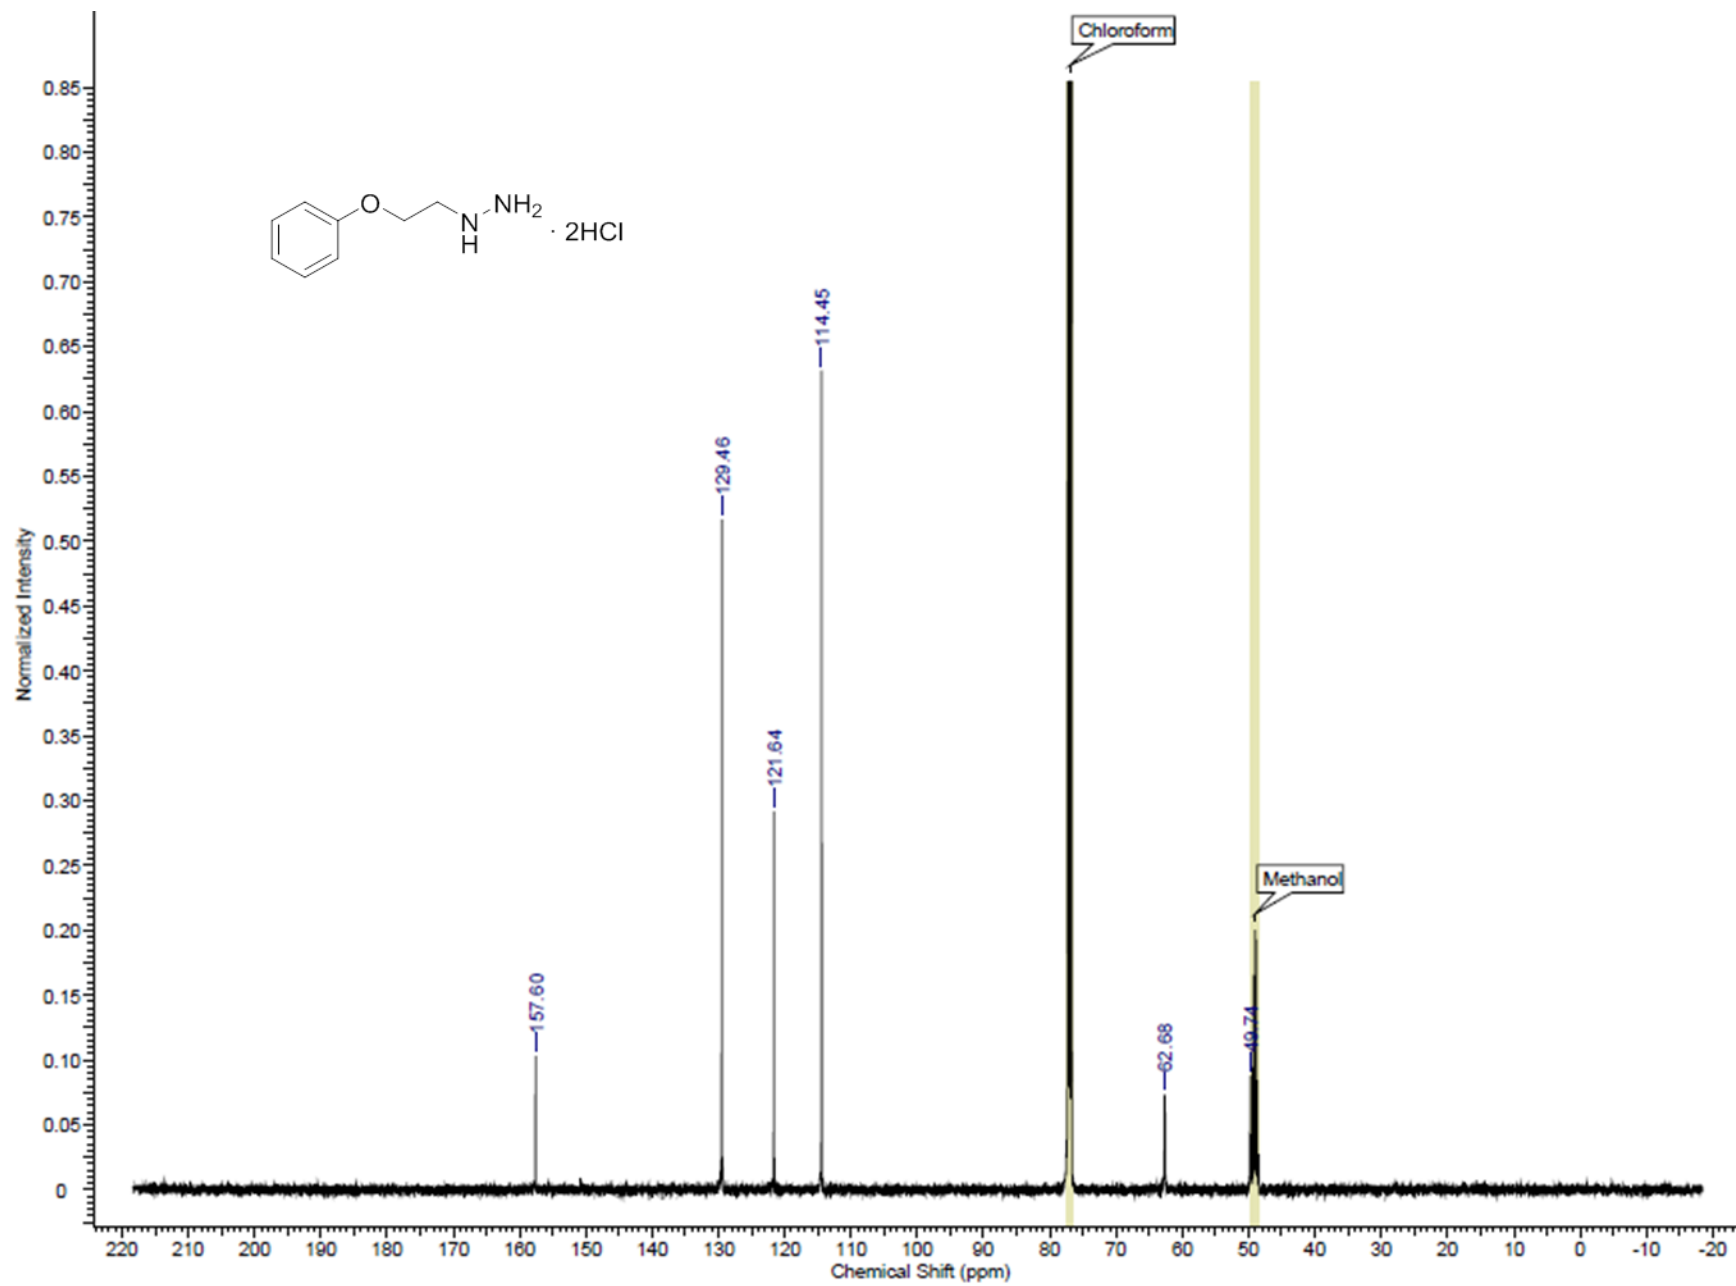



**10b** –  $^1\text{H}$  NMR

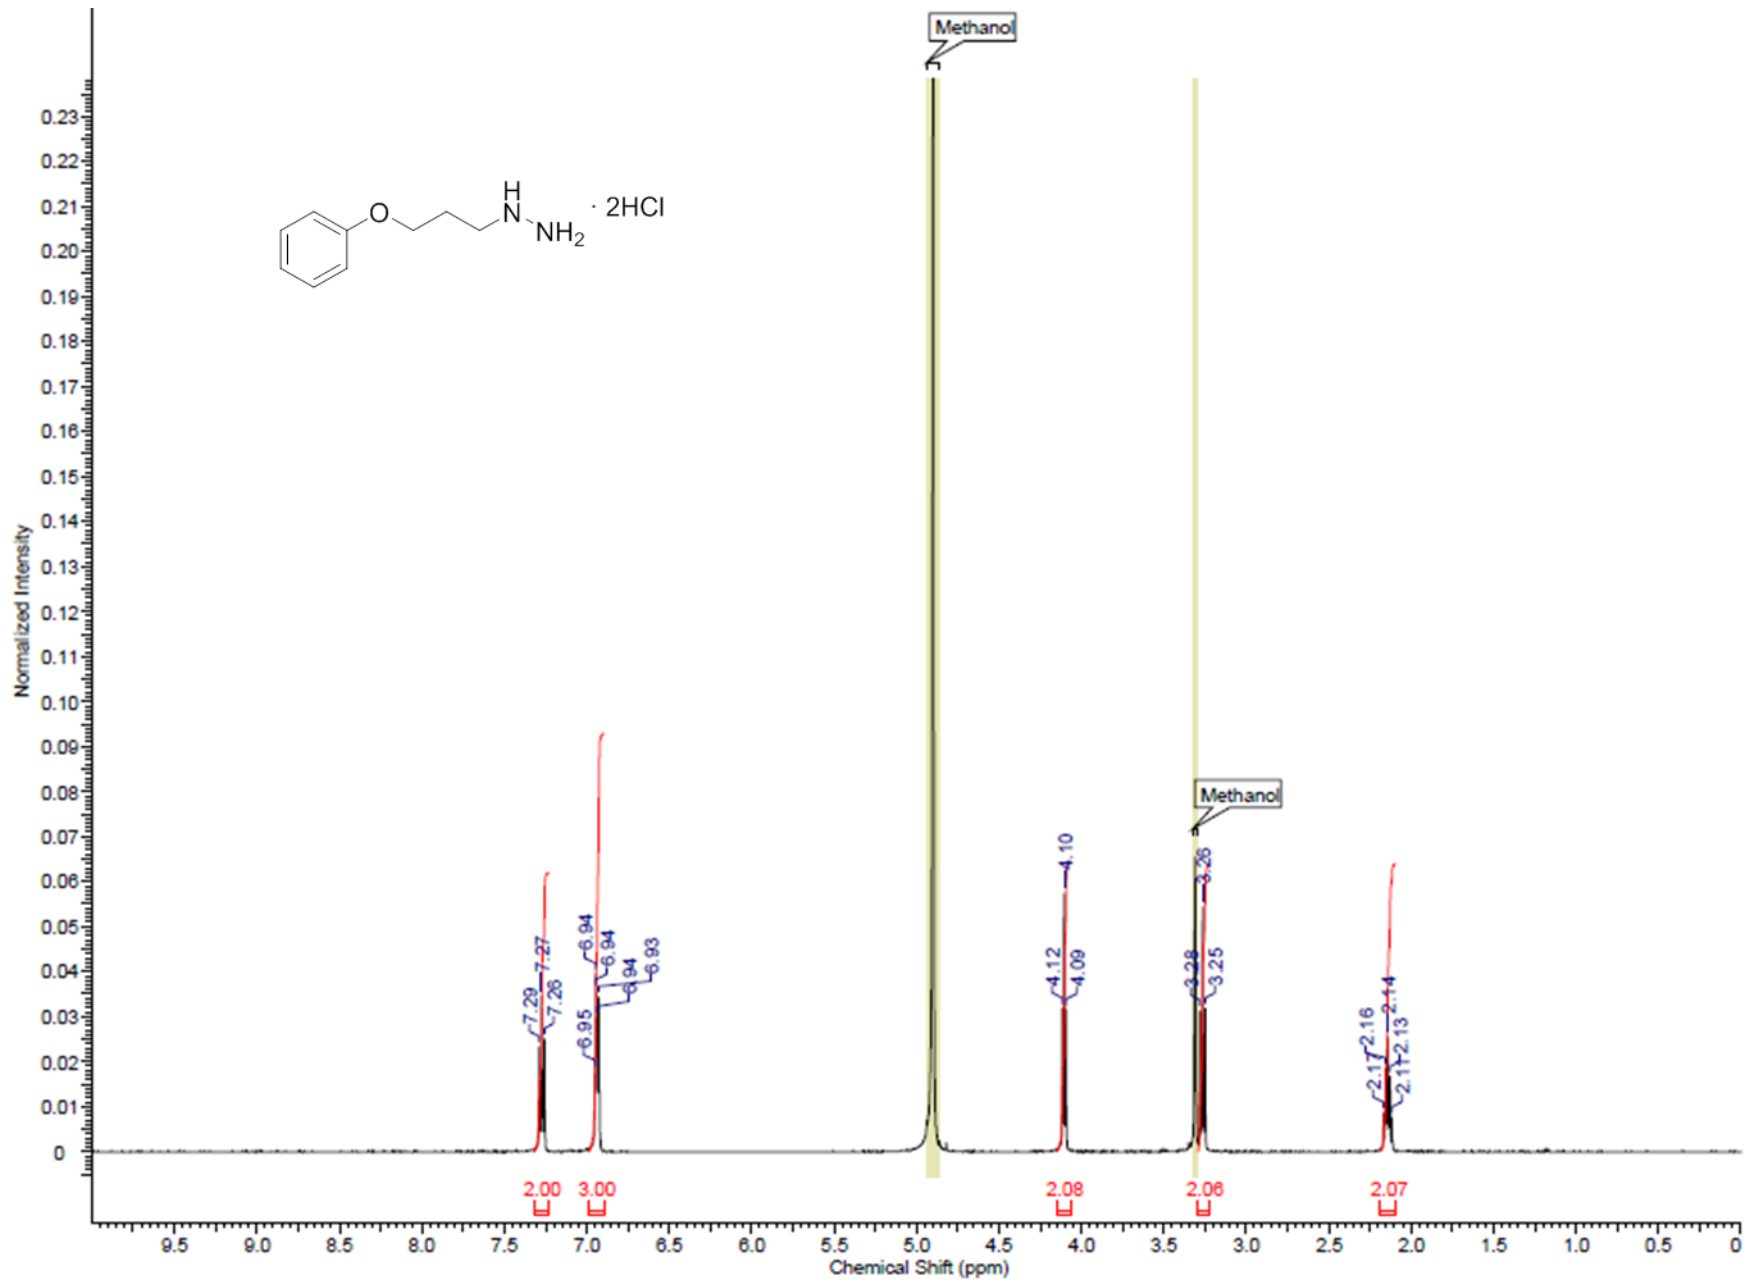

10b -  $^{13}\text{C}$  NMR

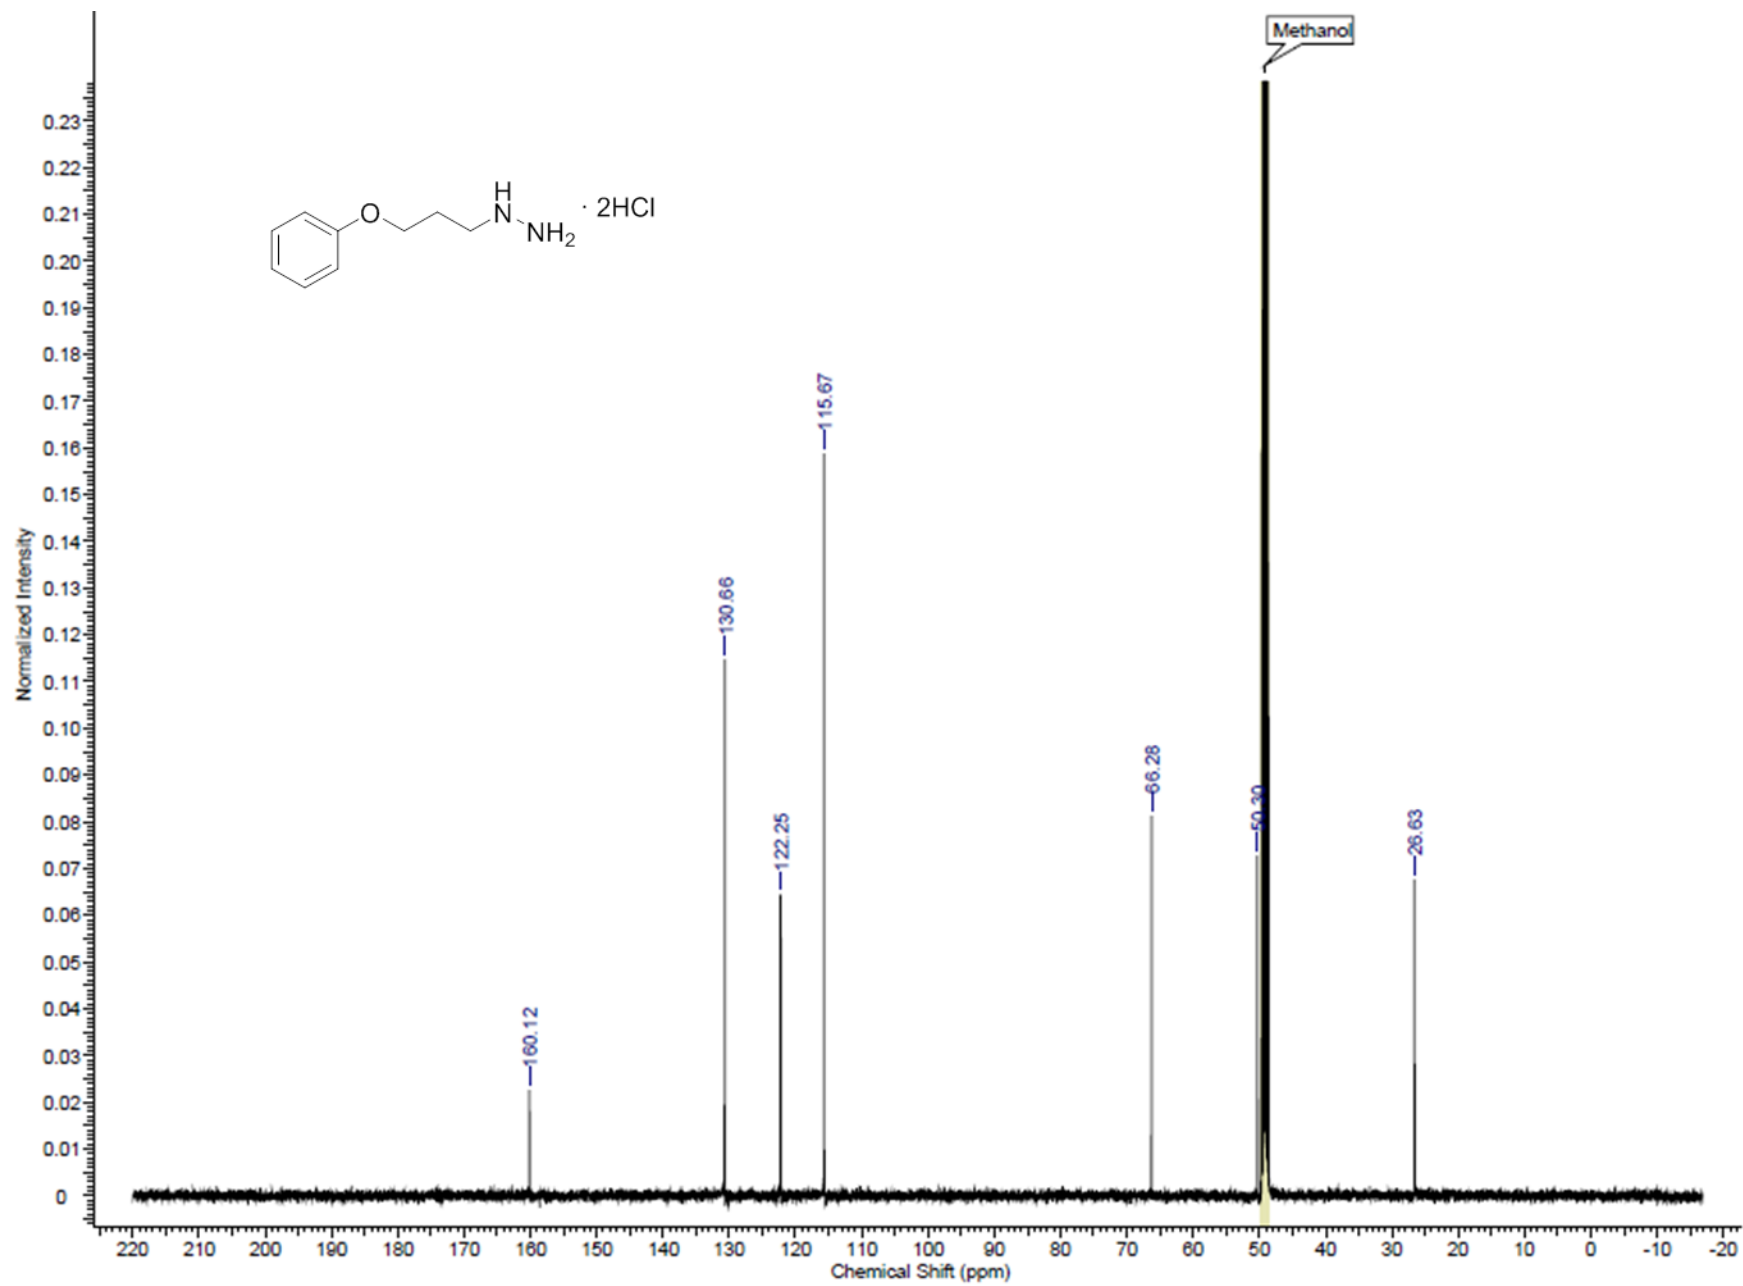

12a - <sup>1</sup>H NMR

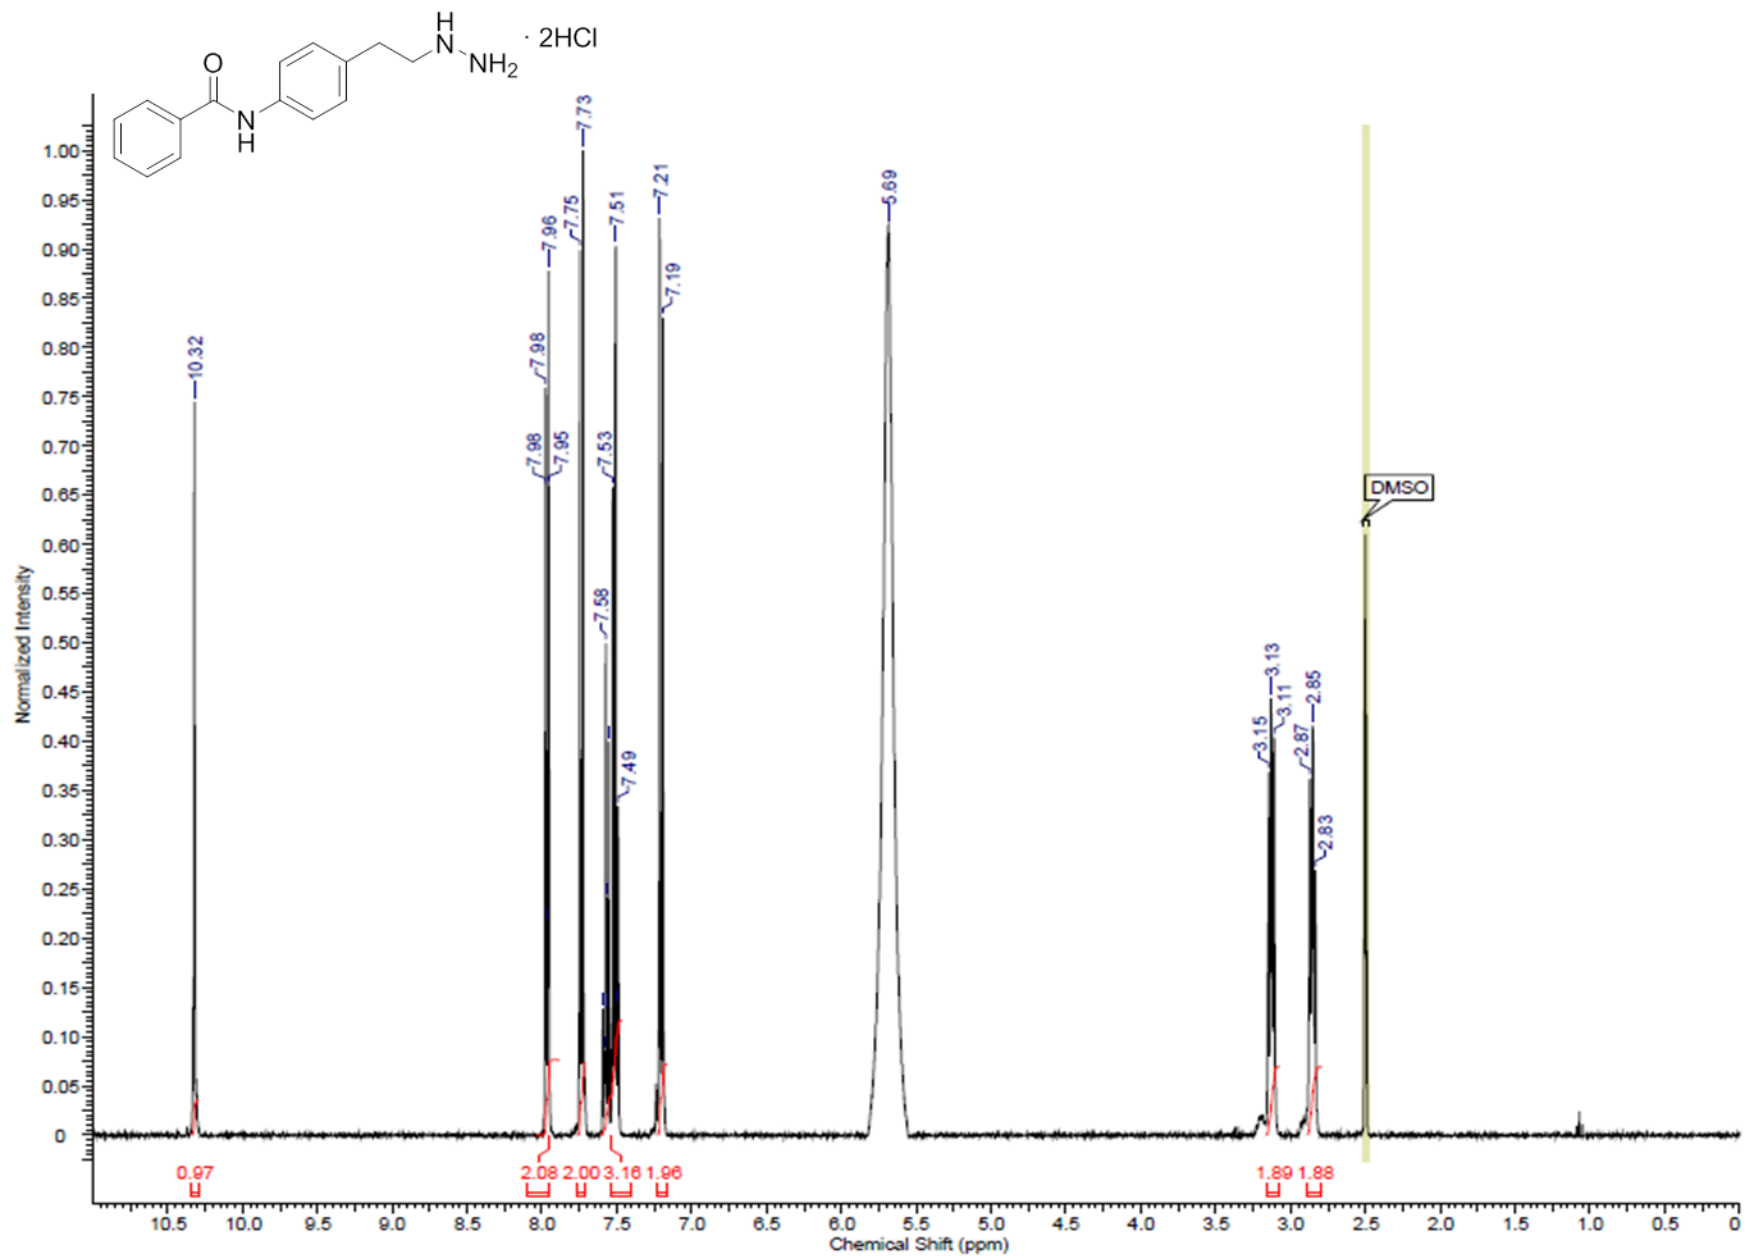

12a - <sup>13</sup>C NMR

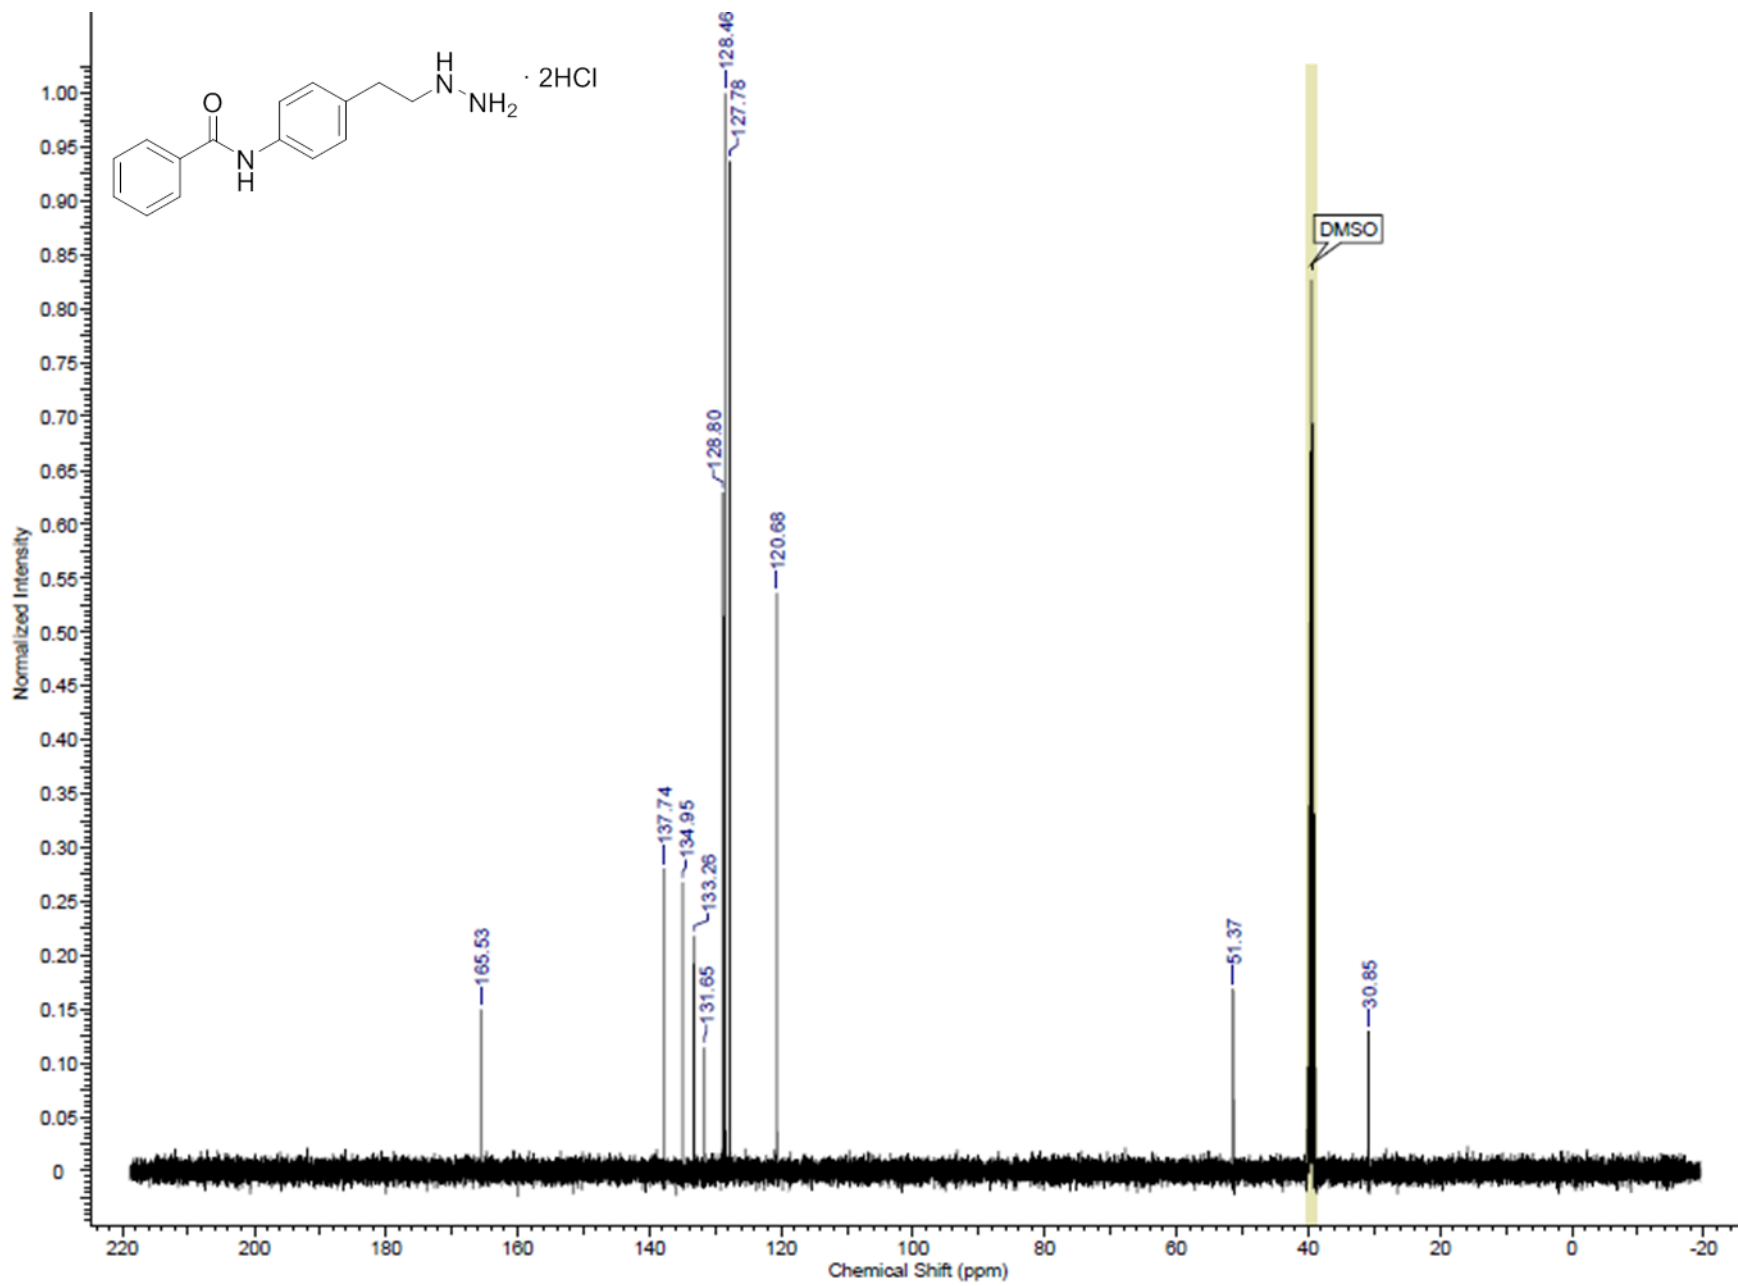

12b - <sup>1</sup>H NMR

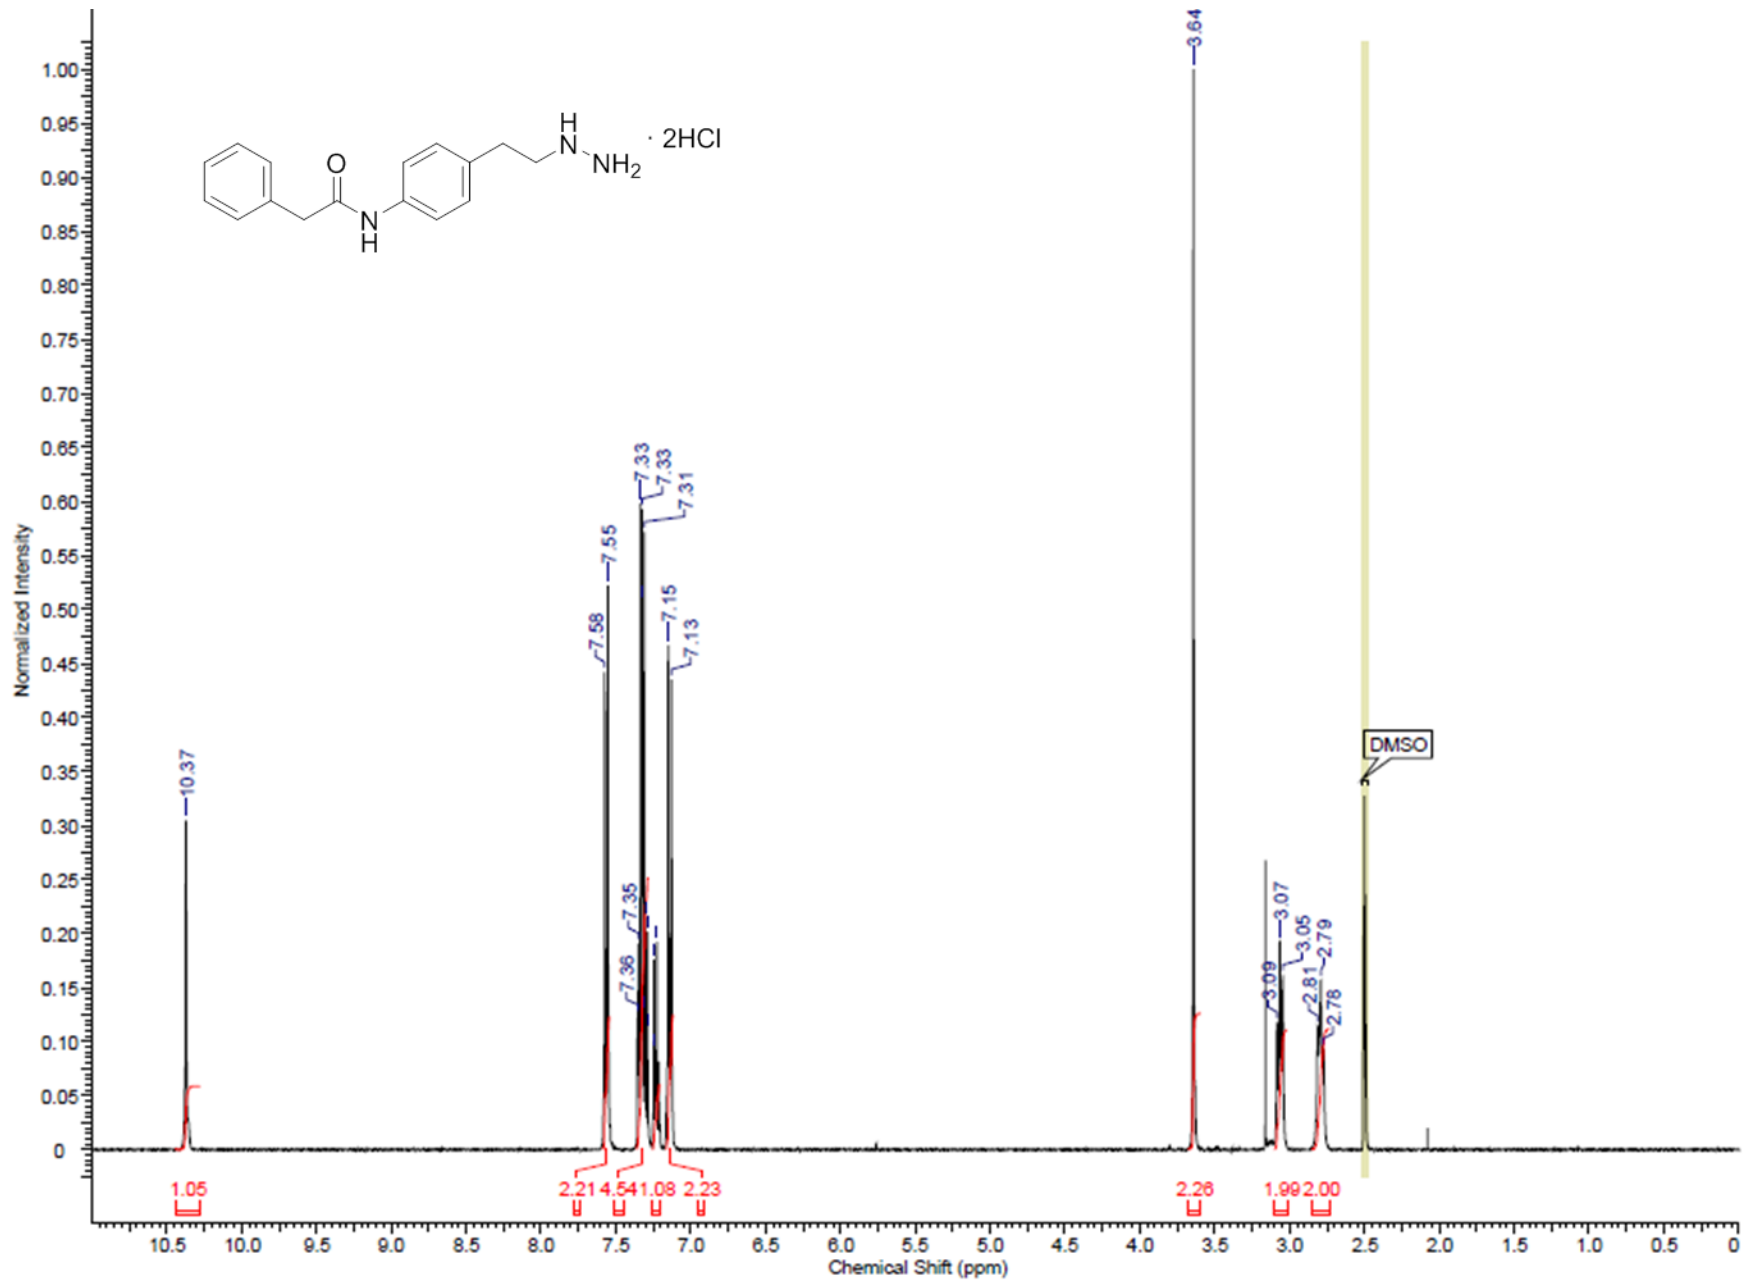

12b - <sup>13</sup>C NMR

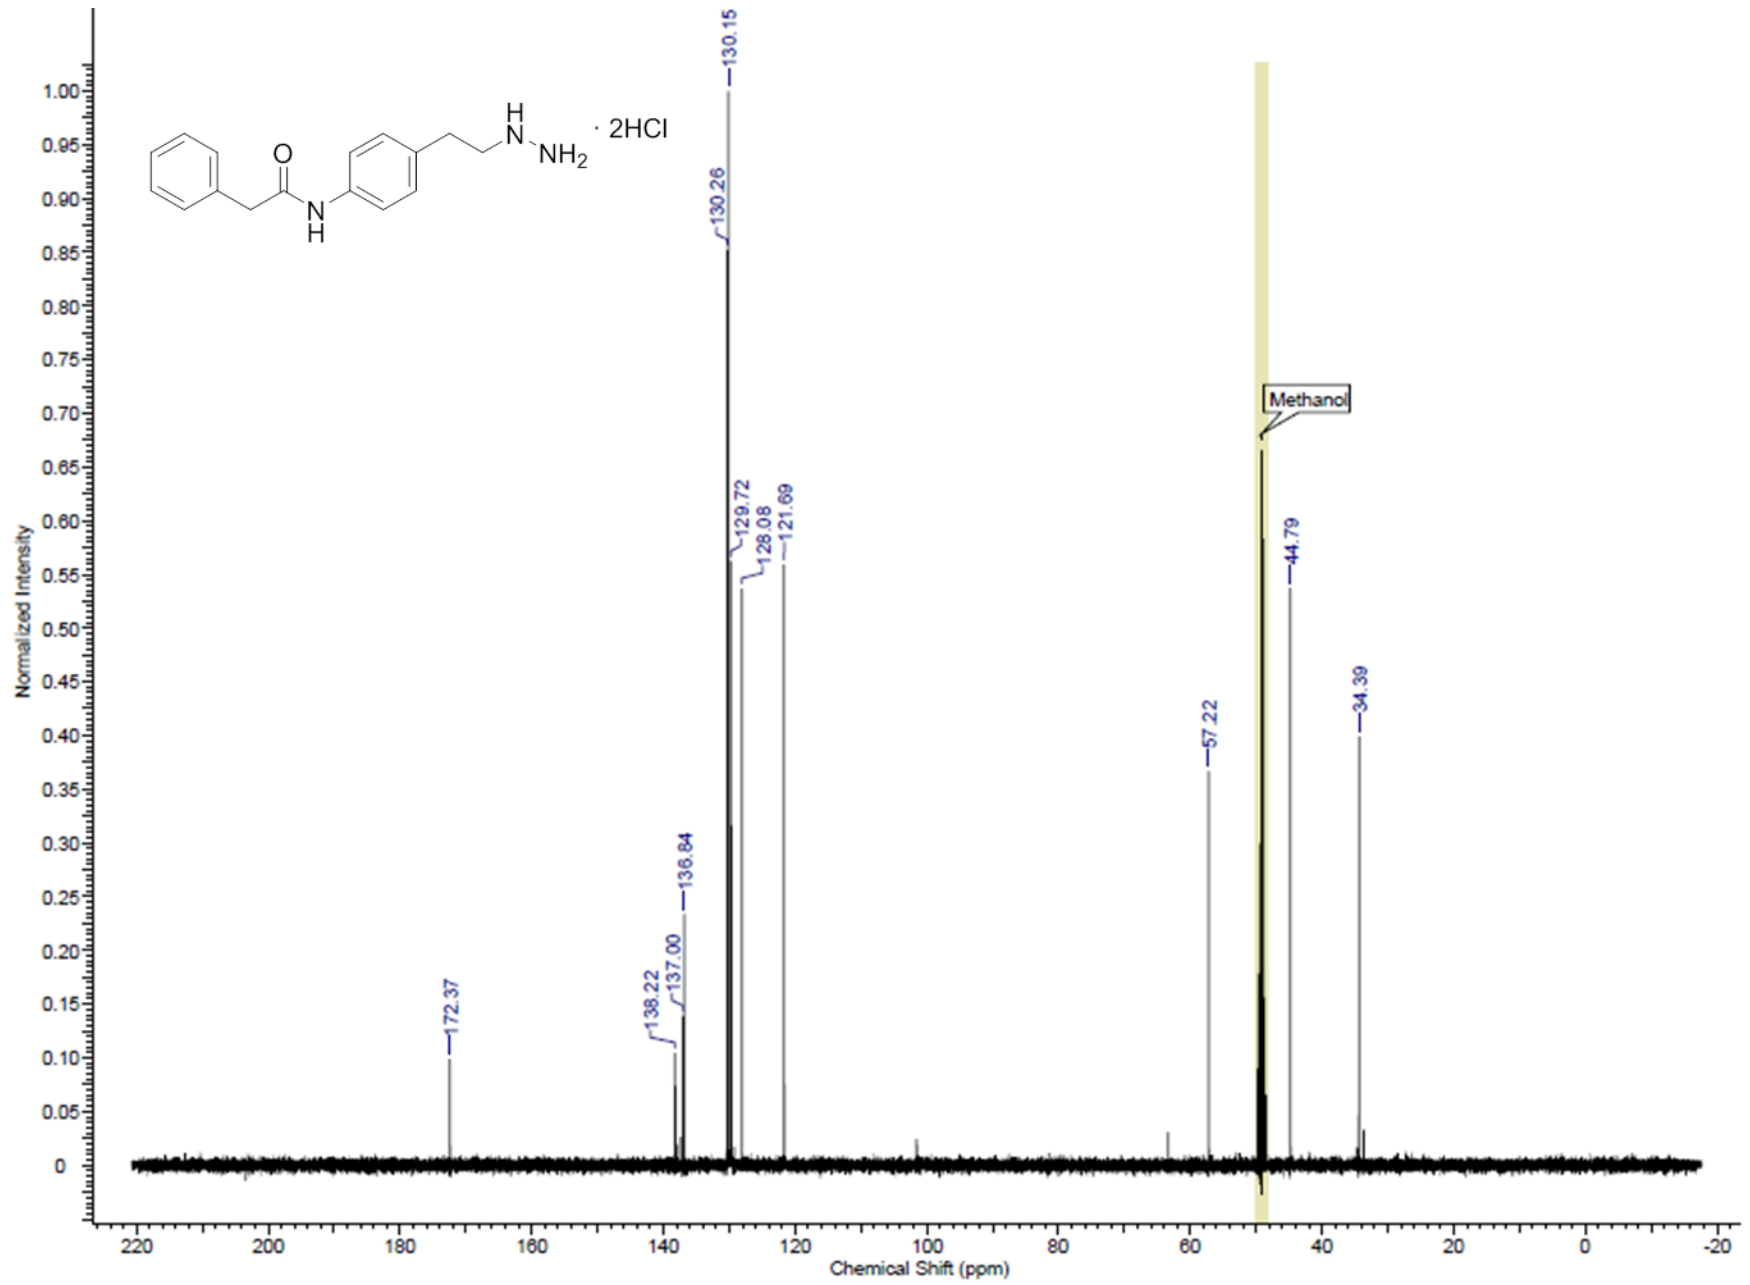

12c - <sup>1</sup>H NMR

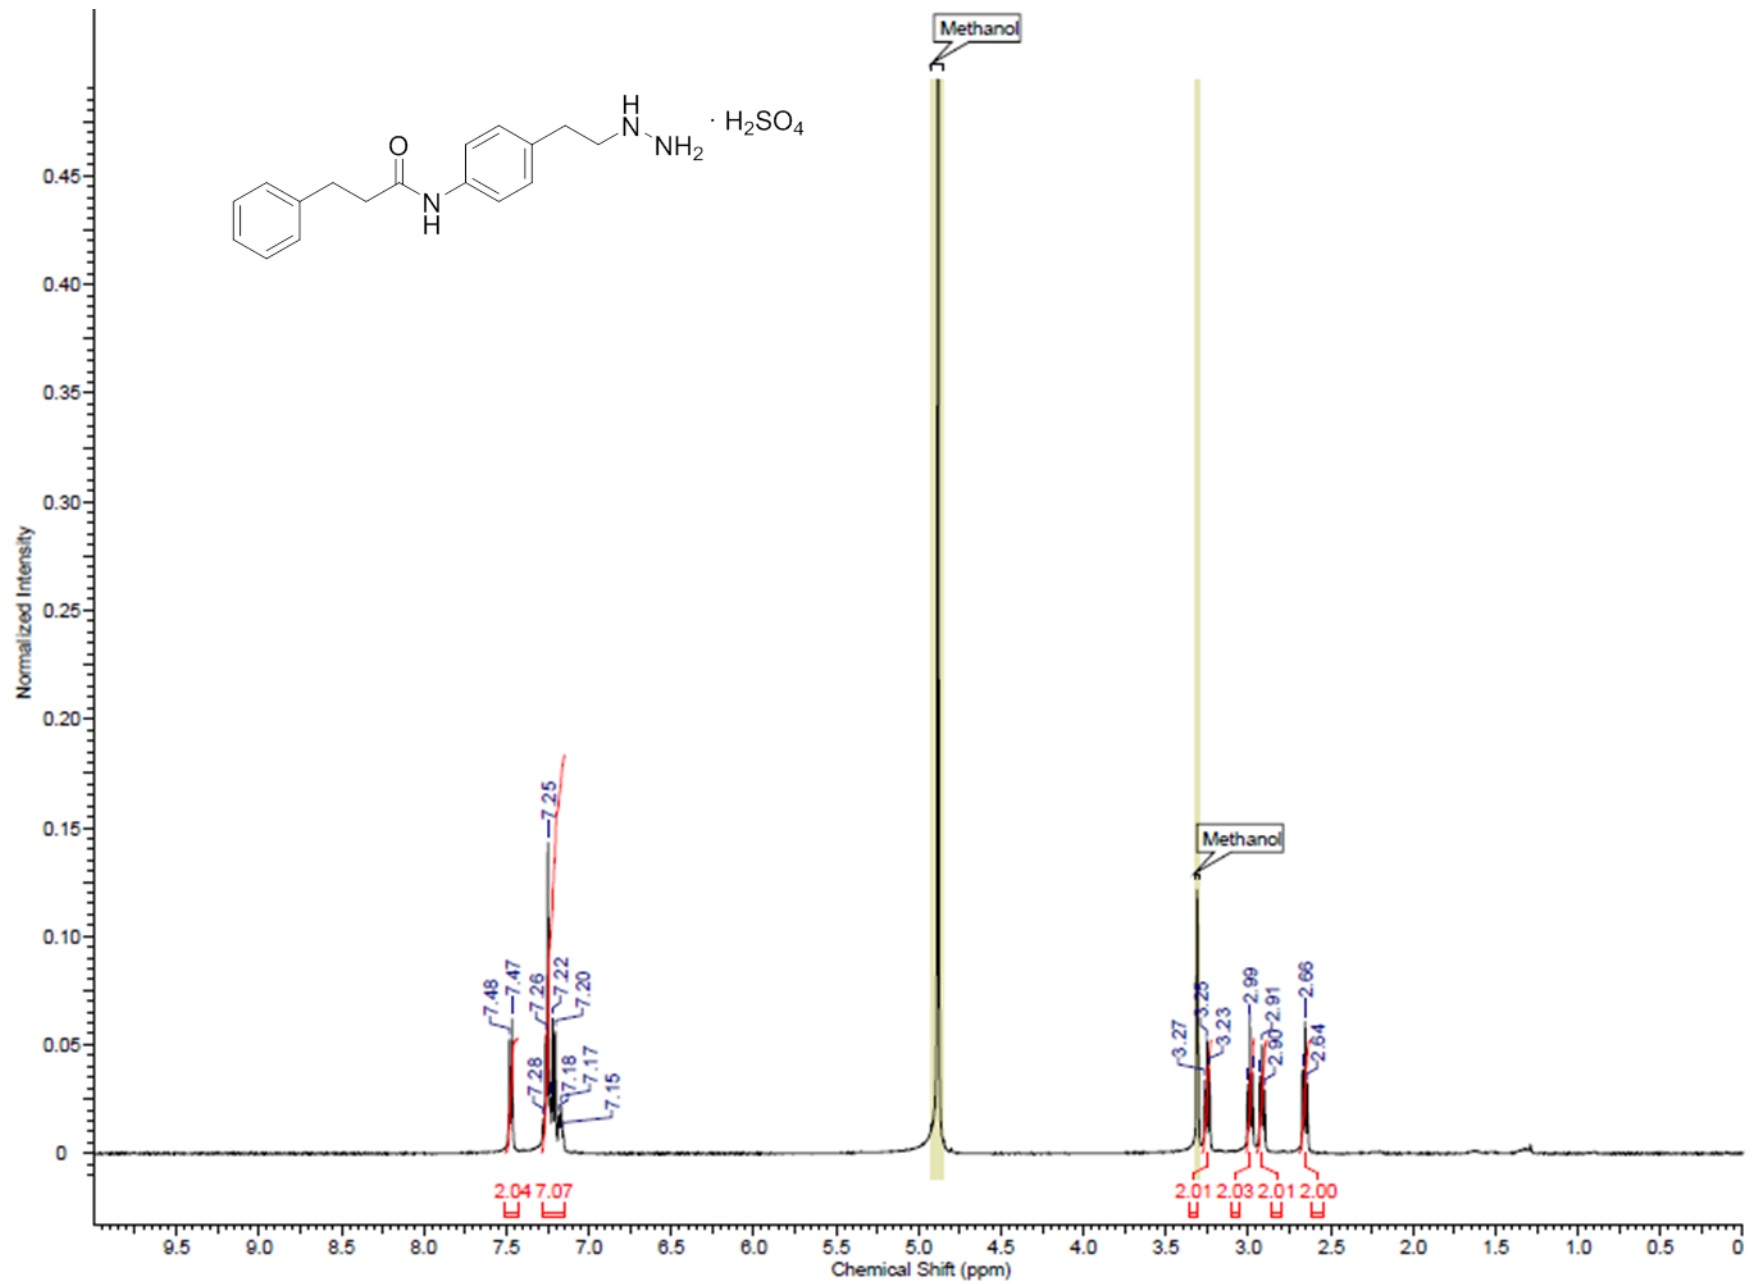

12c -  $^{13}\text{C}$  NMR

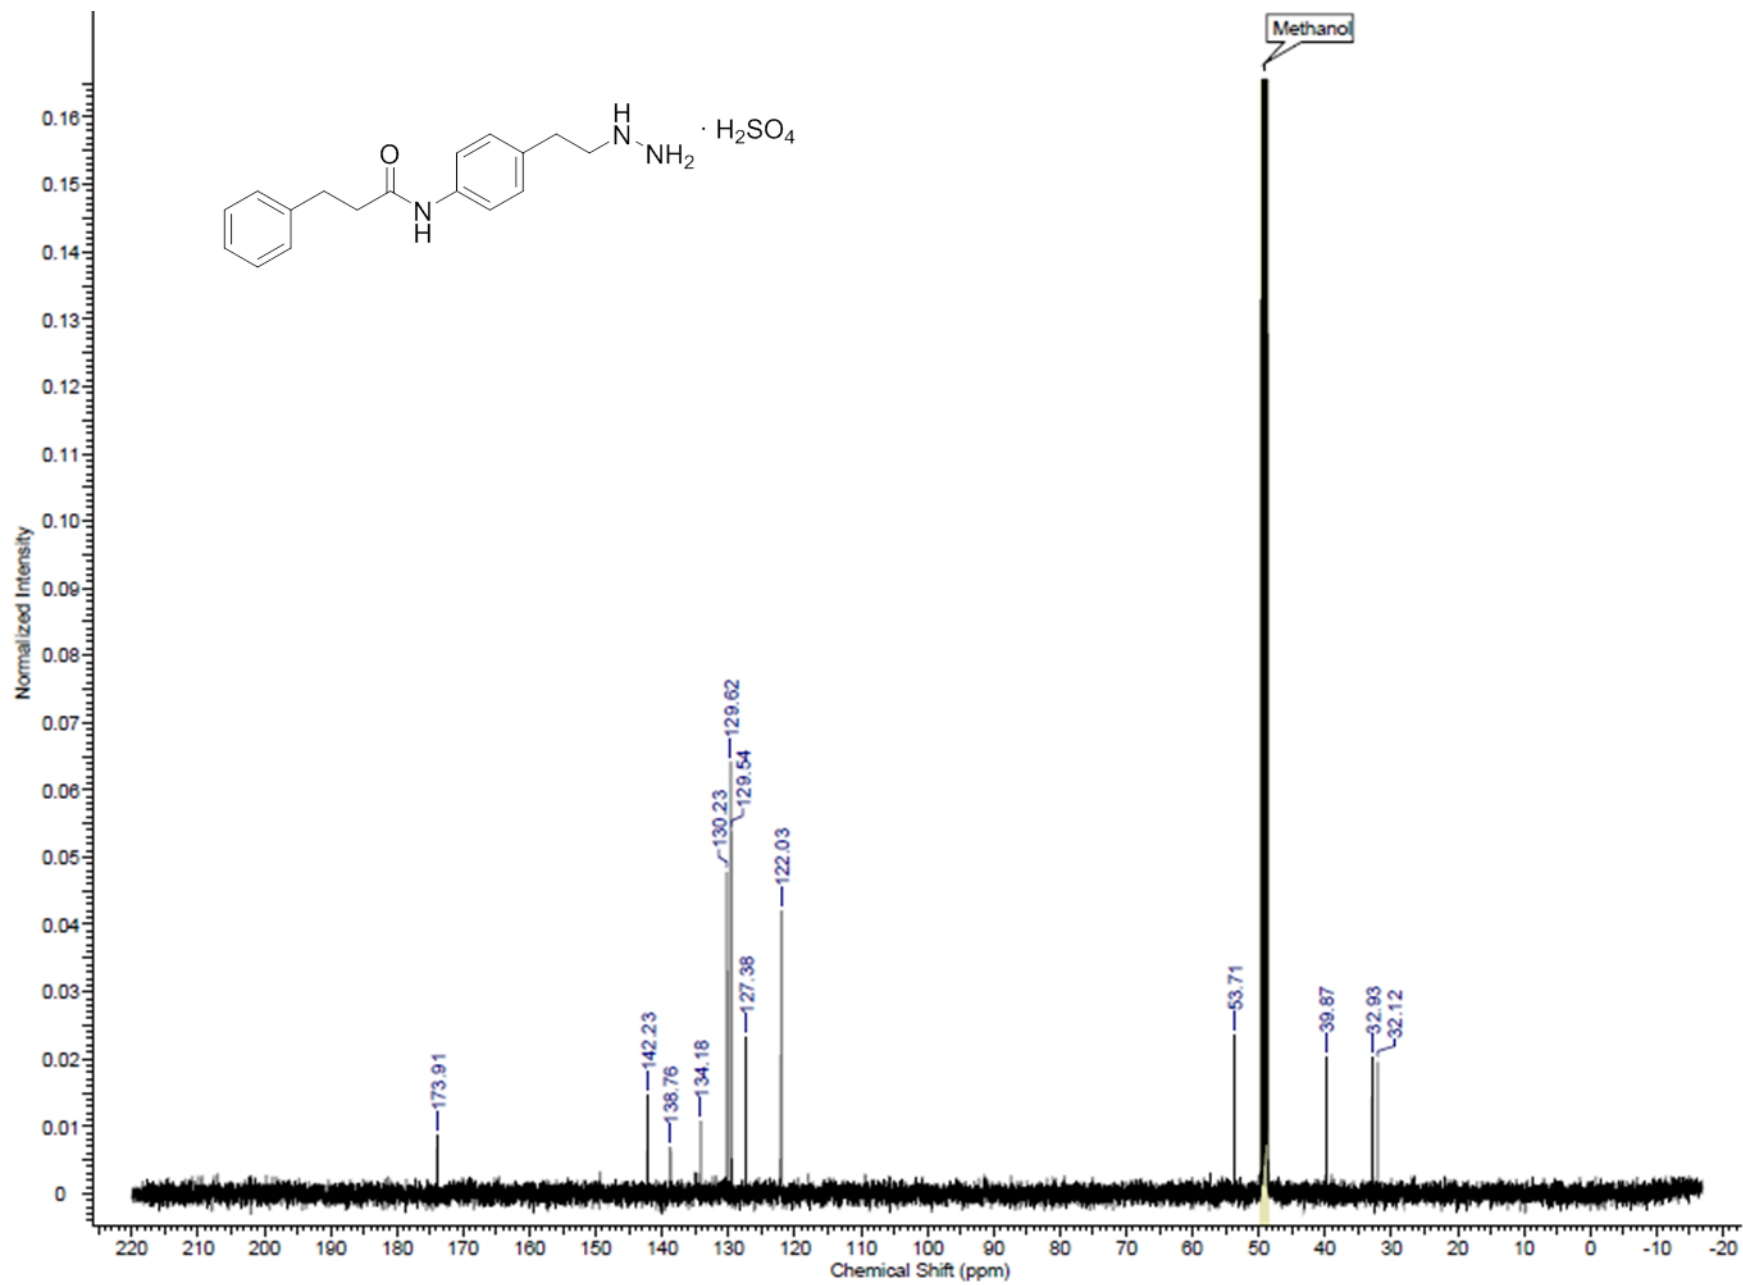



12d - <sup>1</sup>H NMR

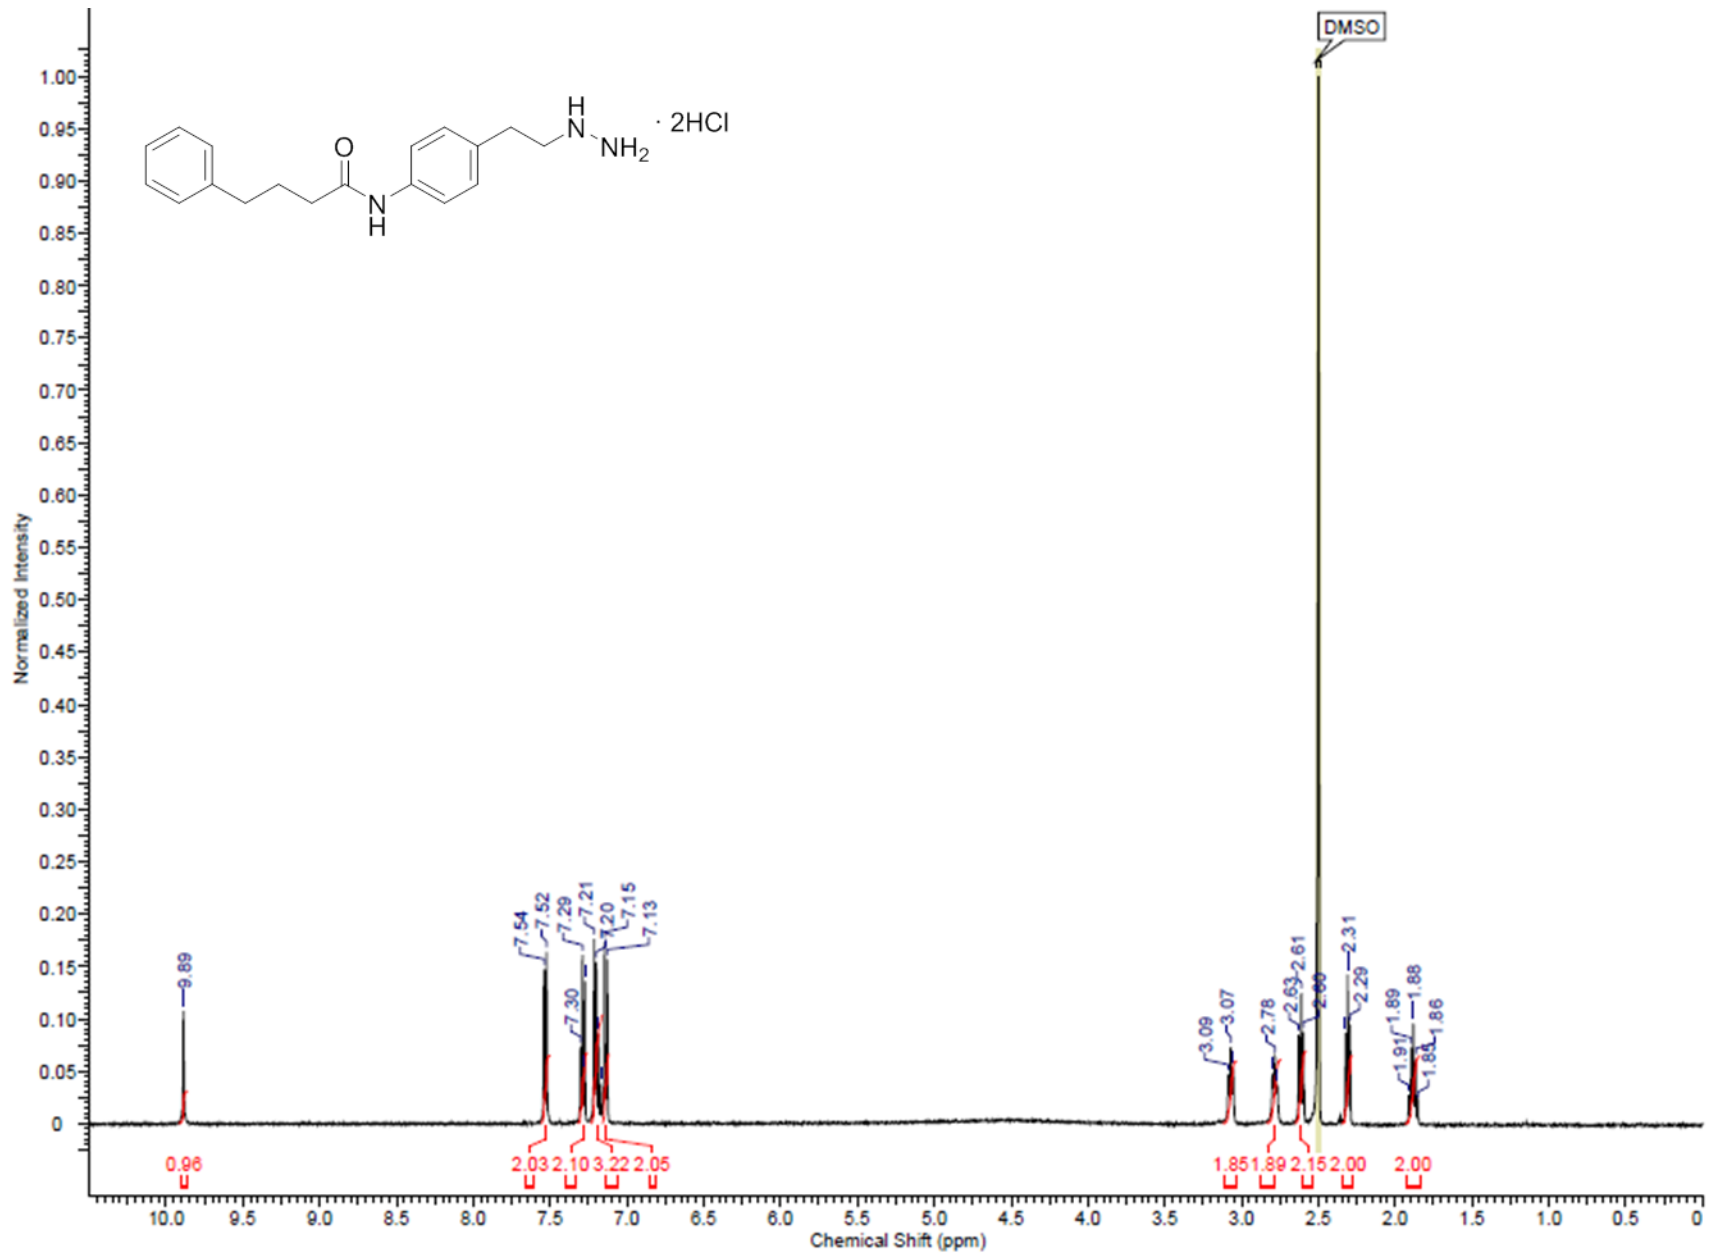

12d - <sup>13</sup>C NMR

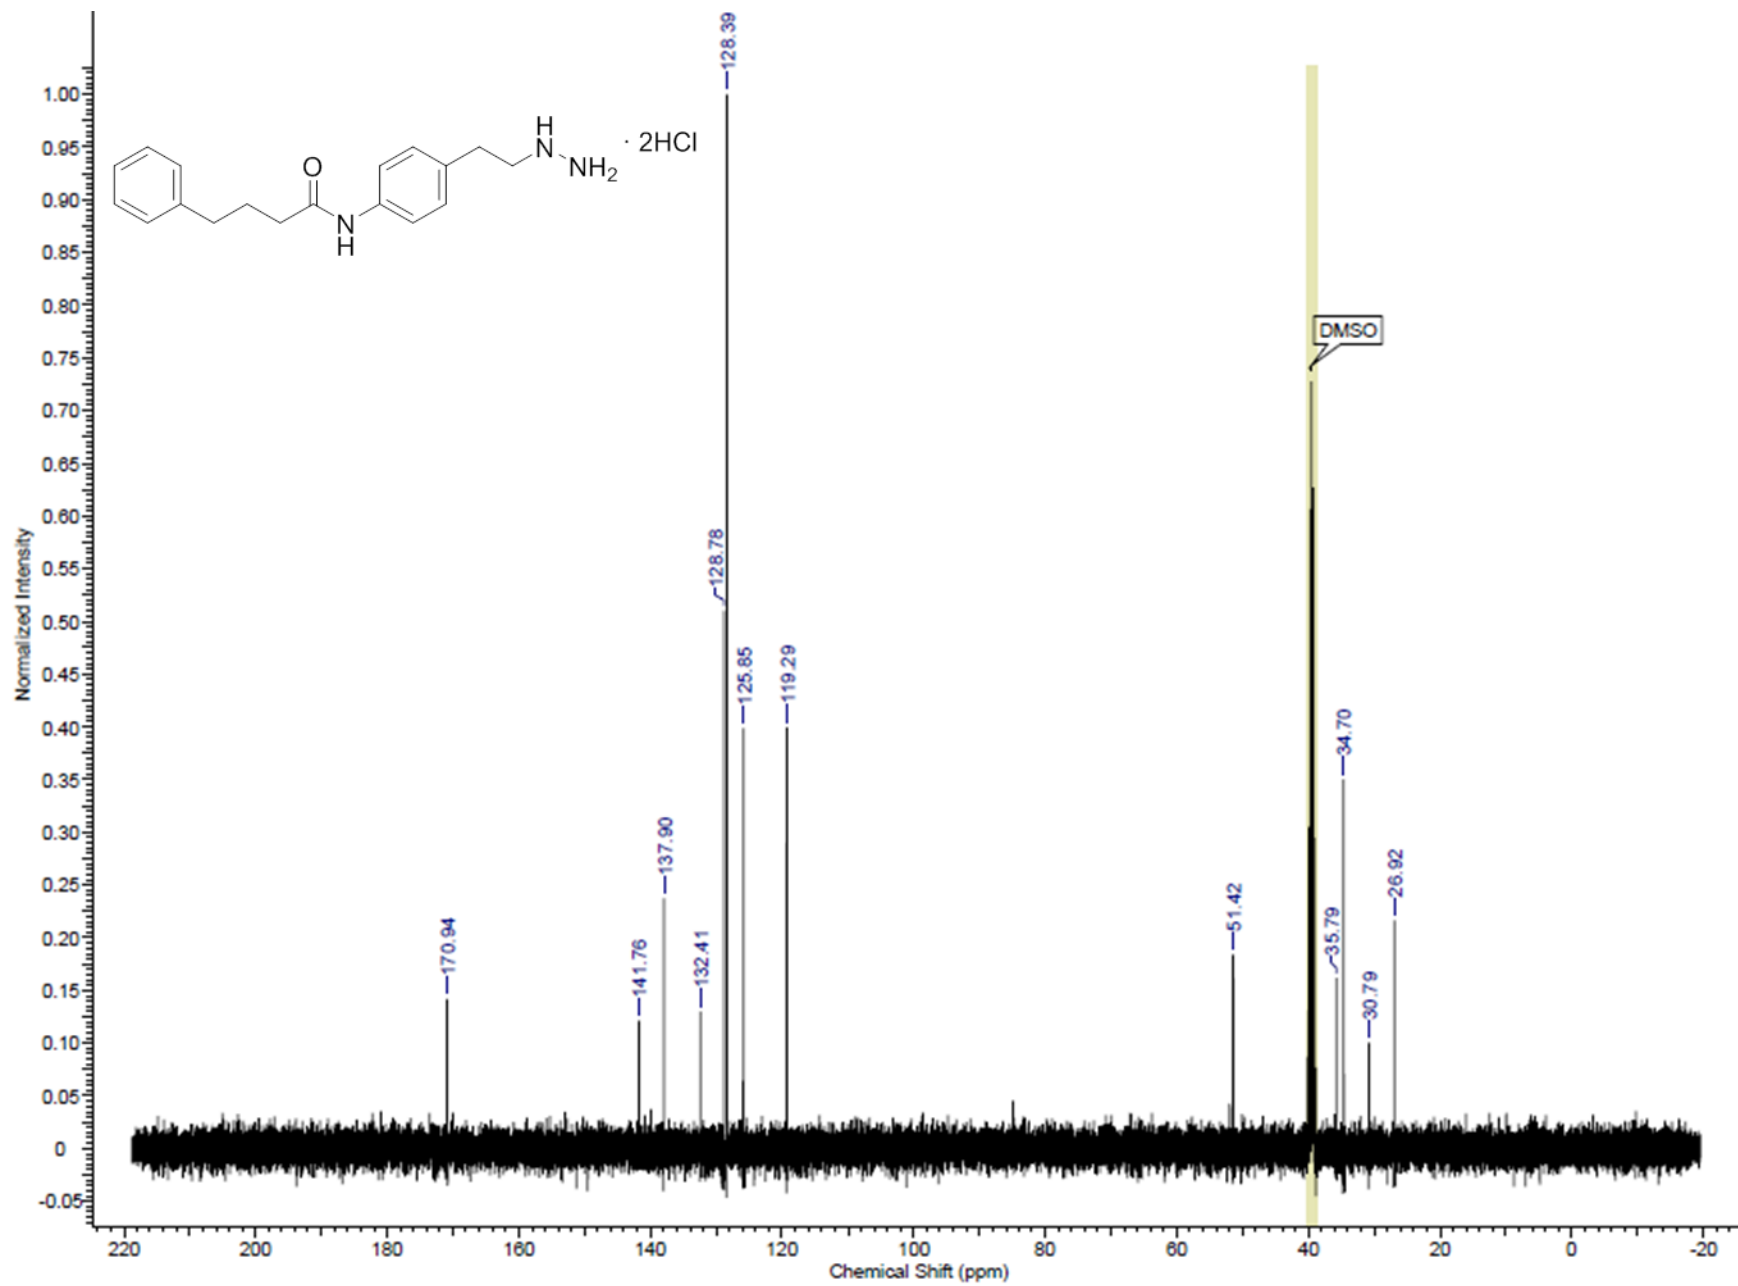

12e -  $^1\text{H}$  NMR

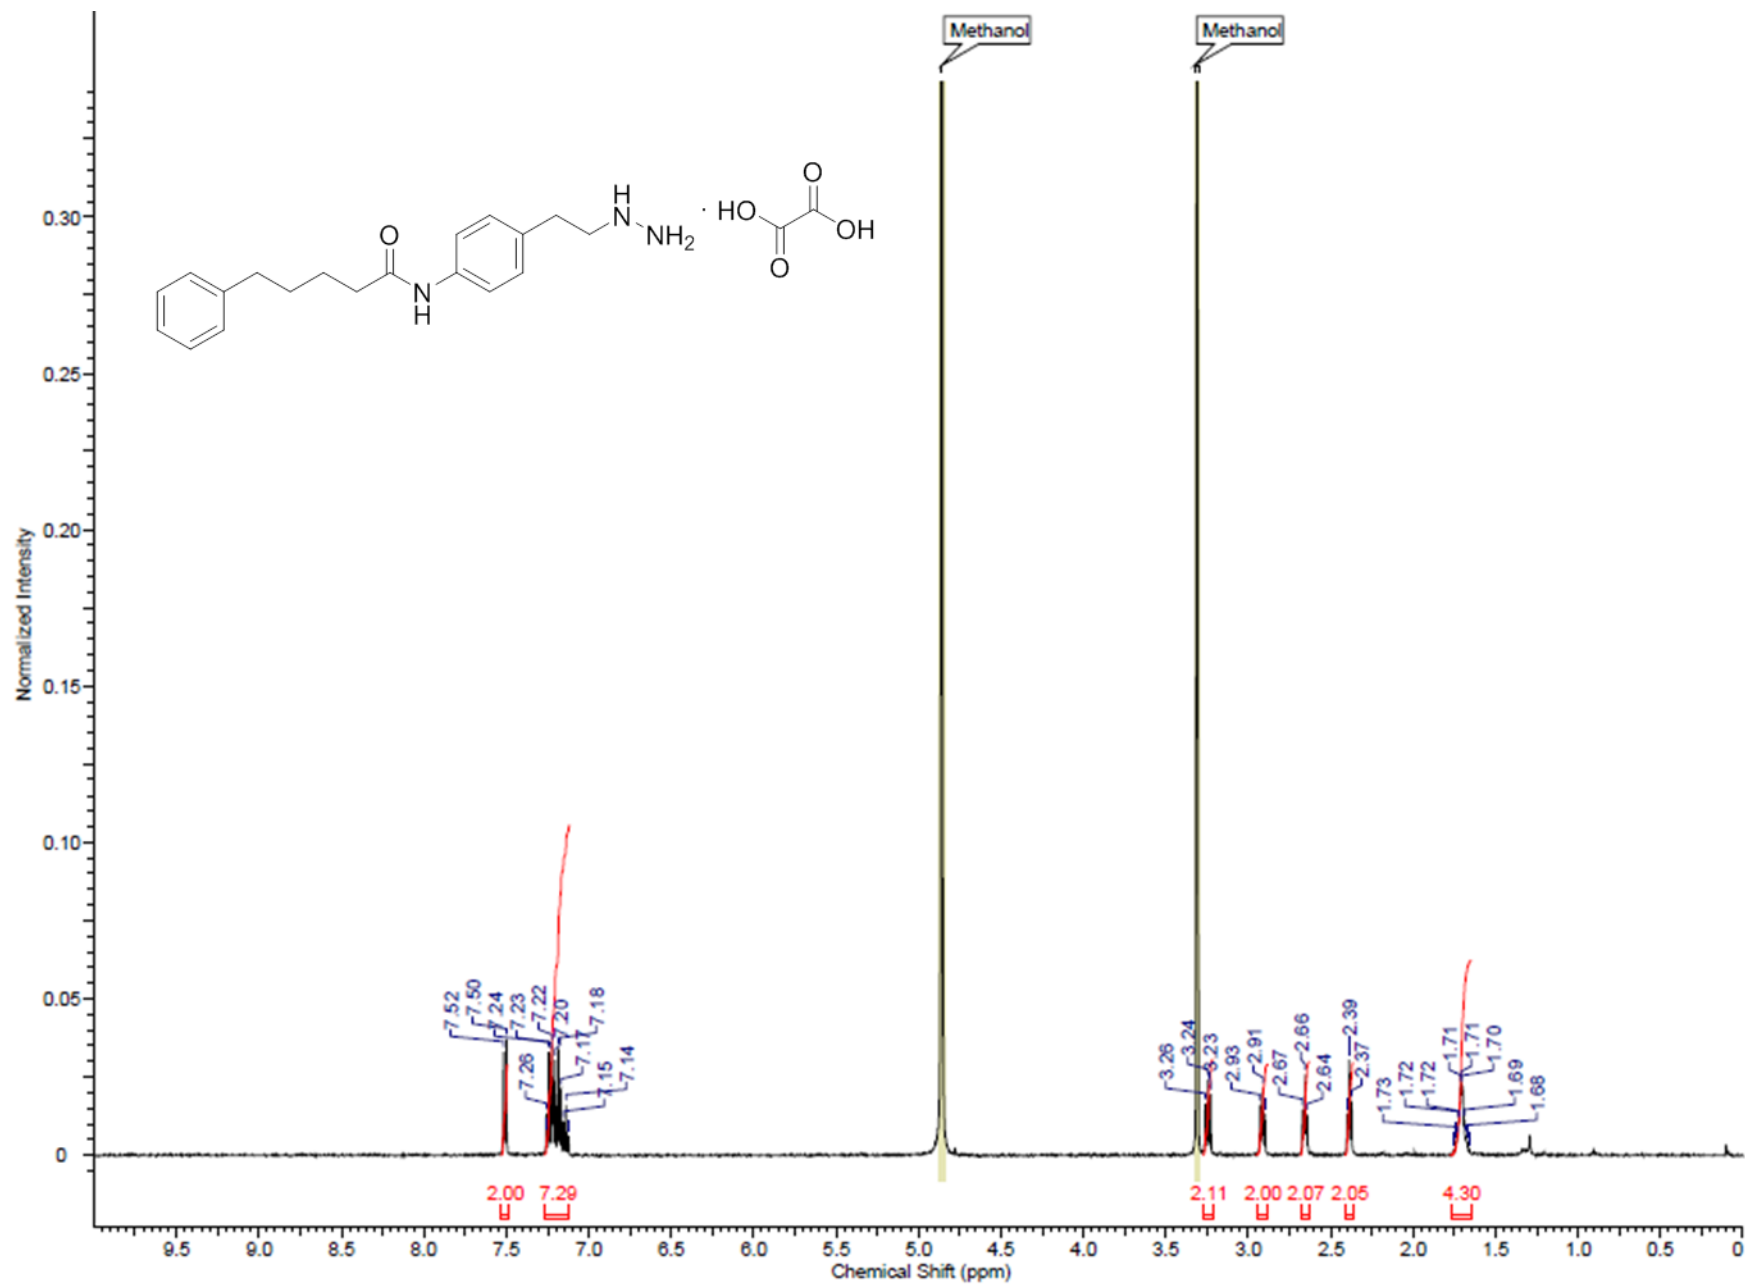

12e -  $^{13}\text{C}$  NMR

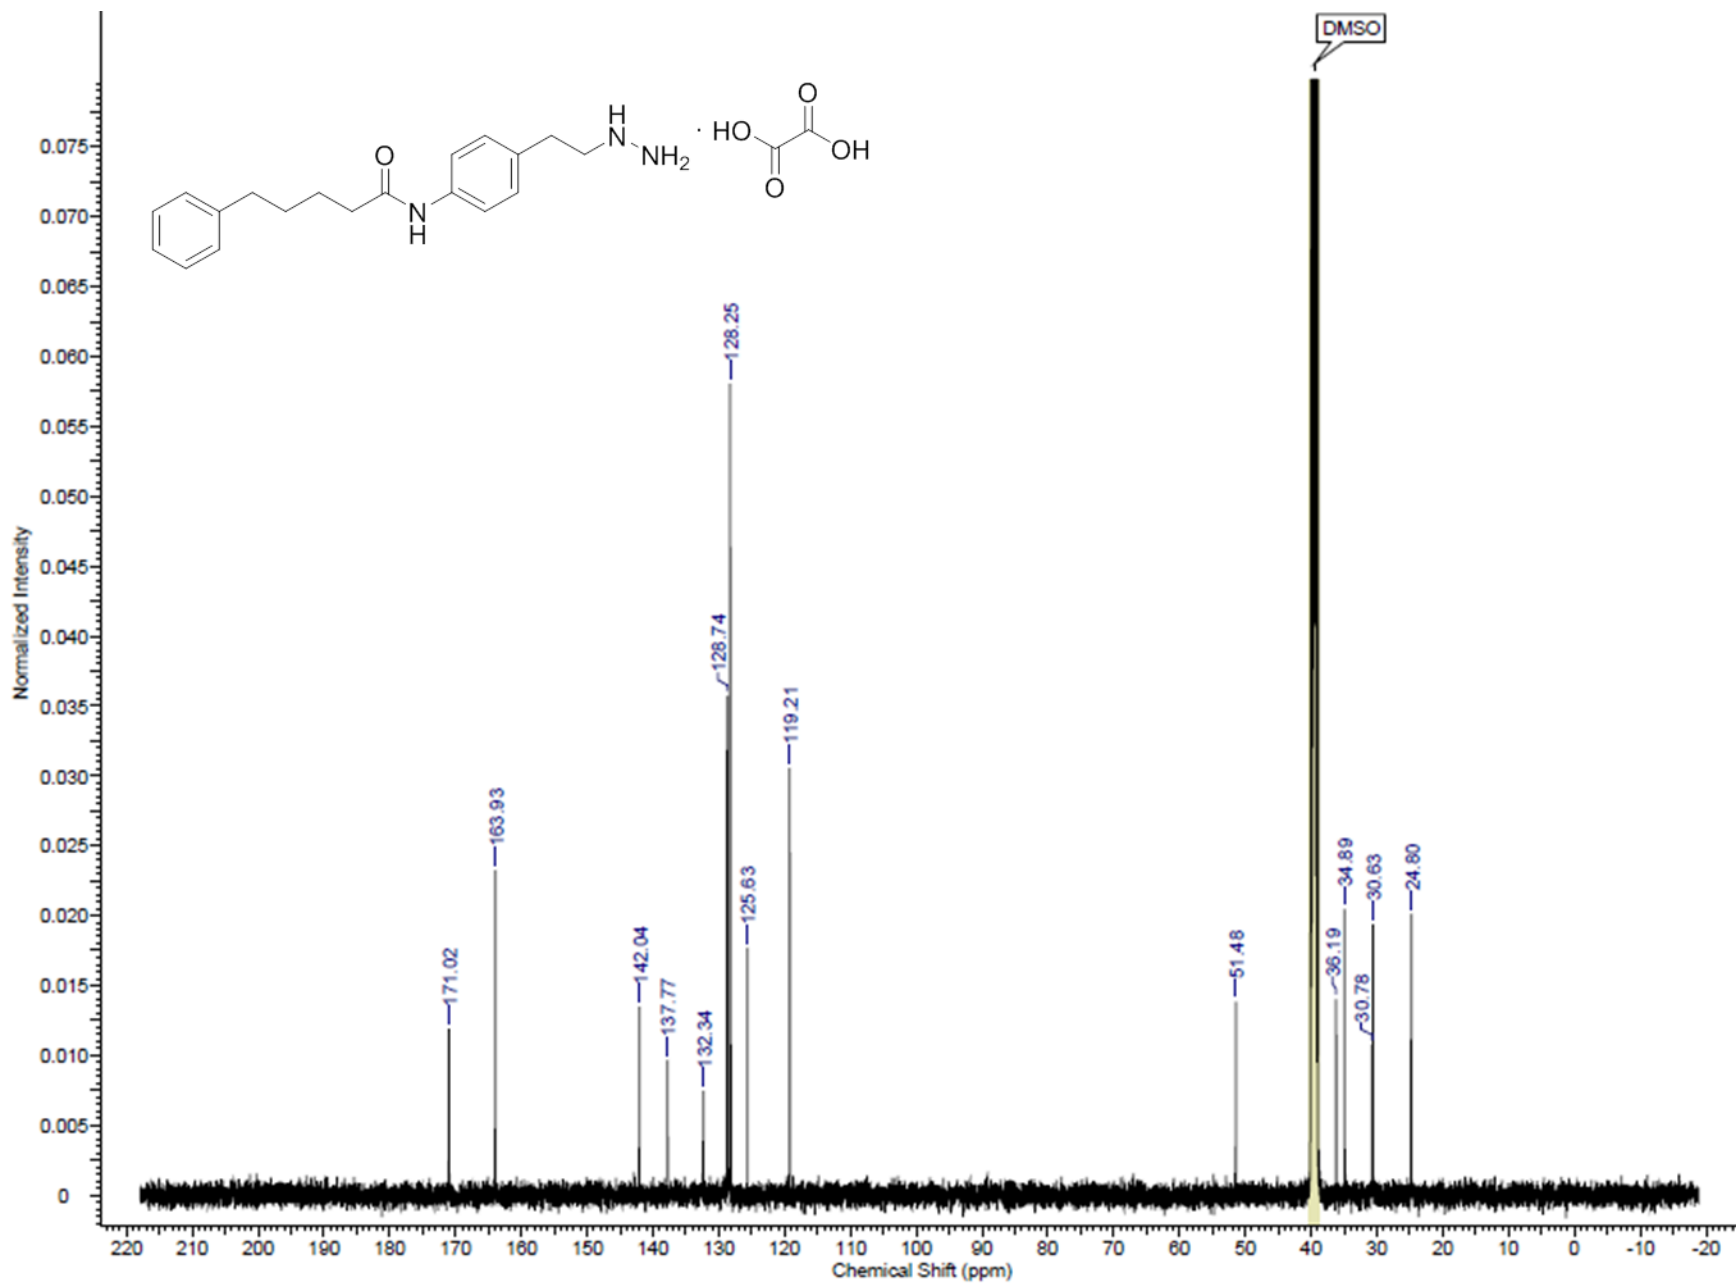

12f - <sup>1</sup>H NMR

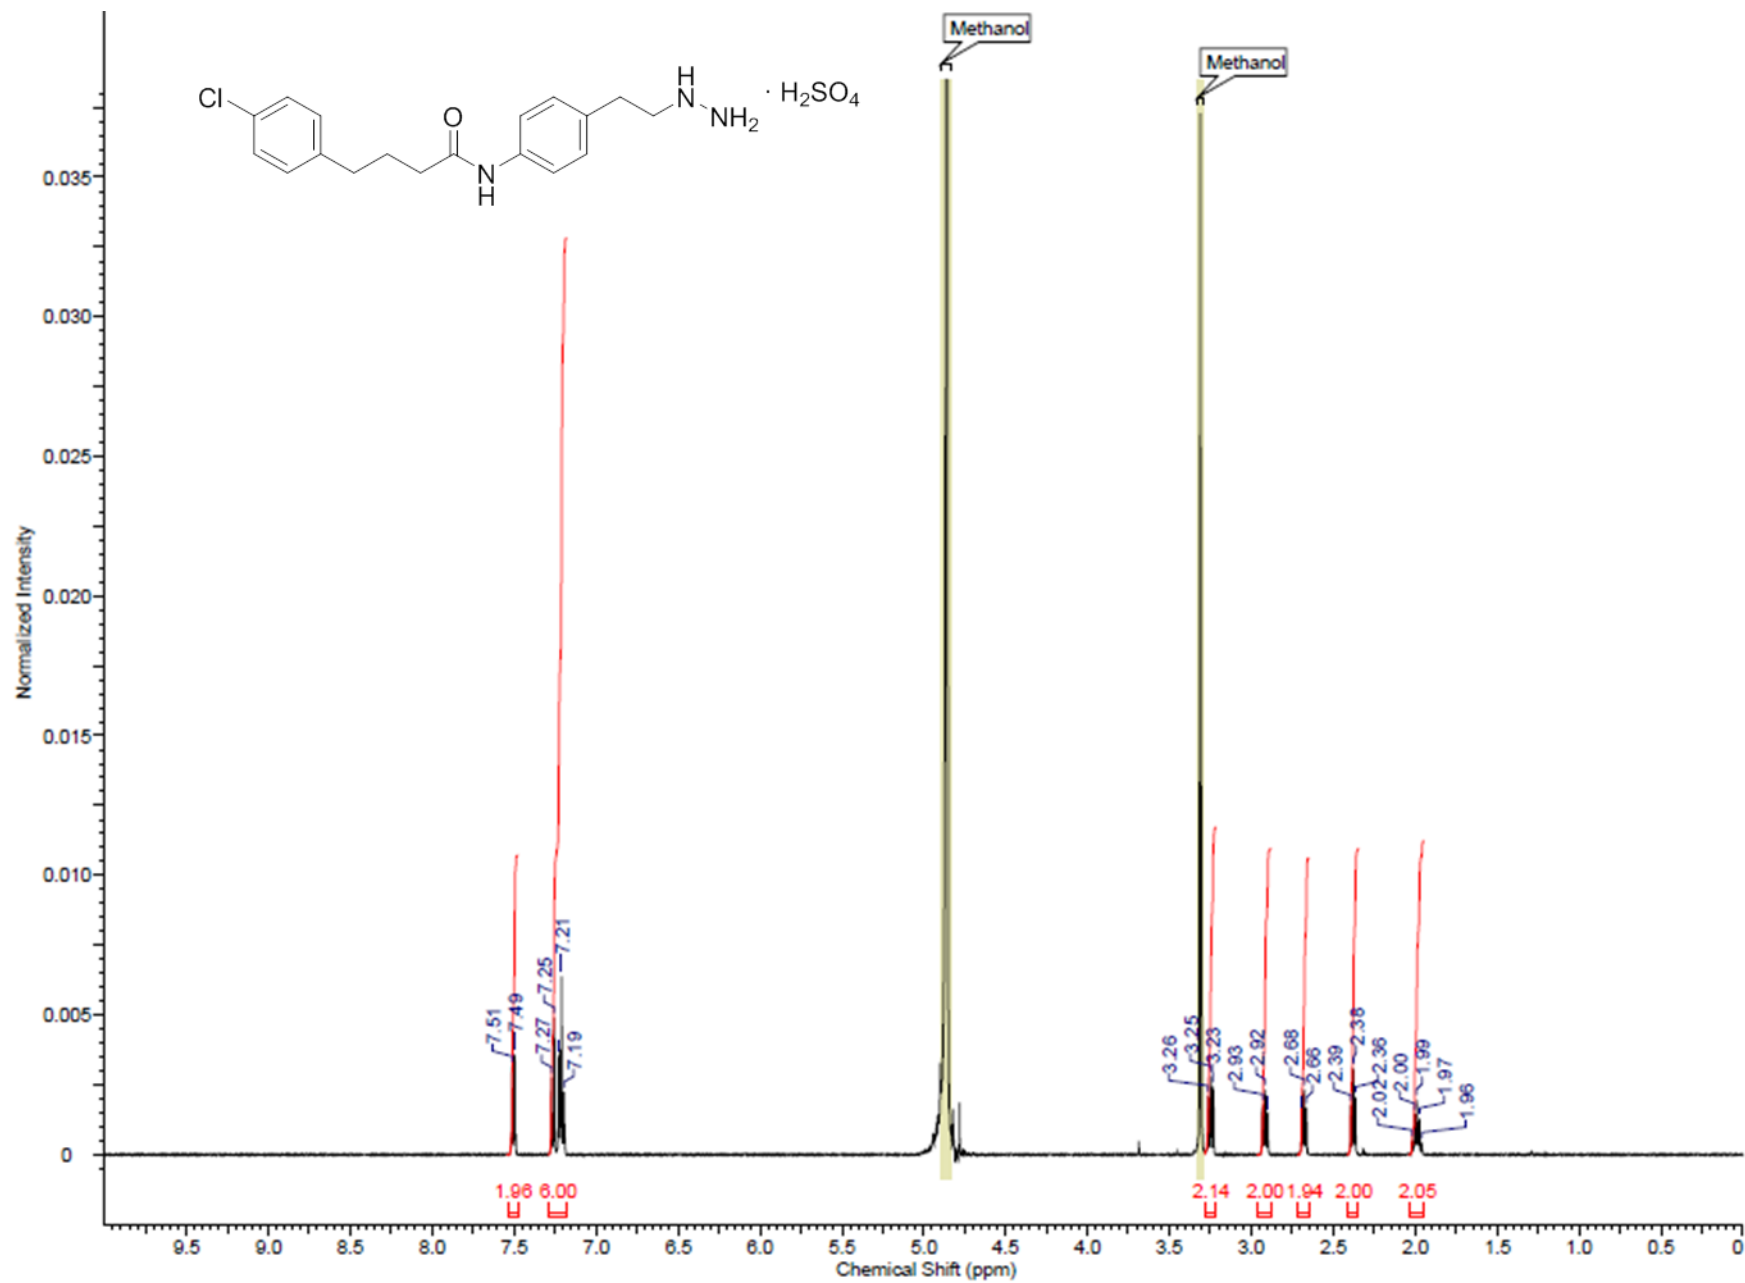

12f - <sup>13</sup>C NMR

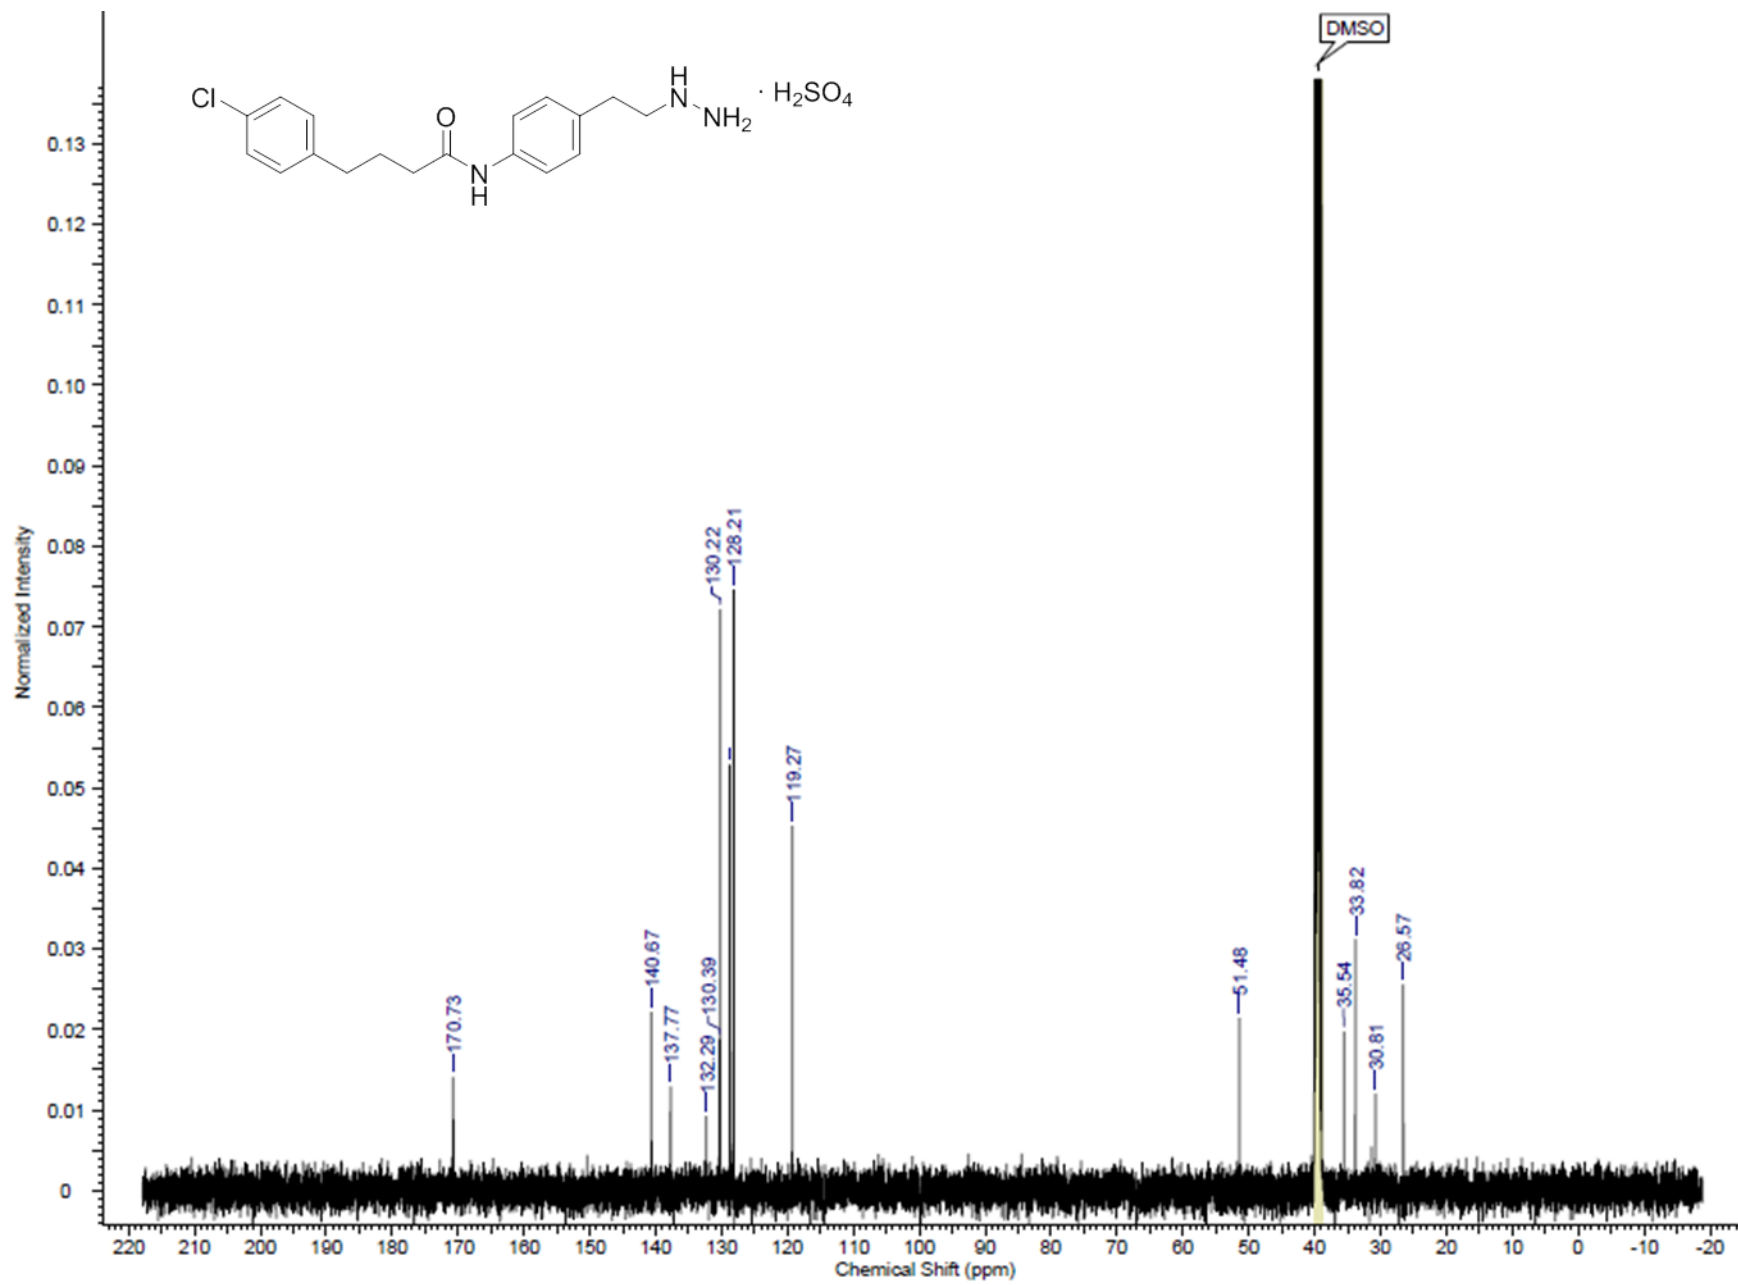

12g - <sup>1</sup>H NMR

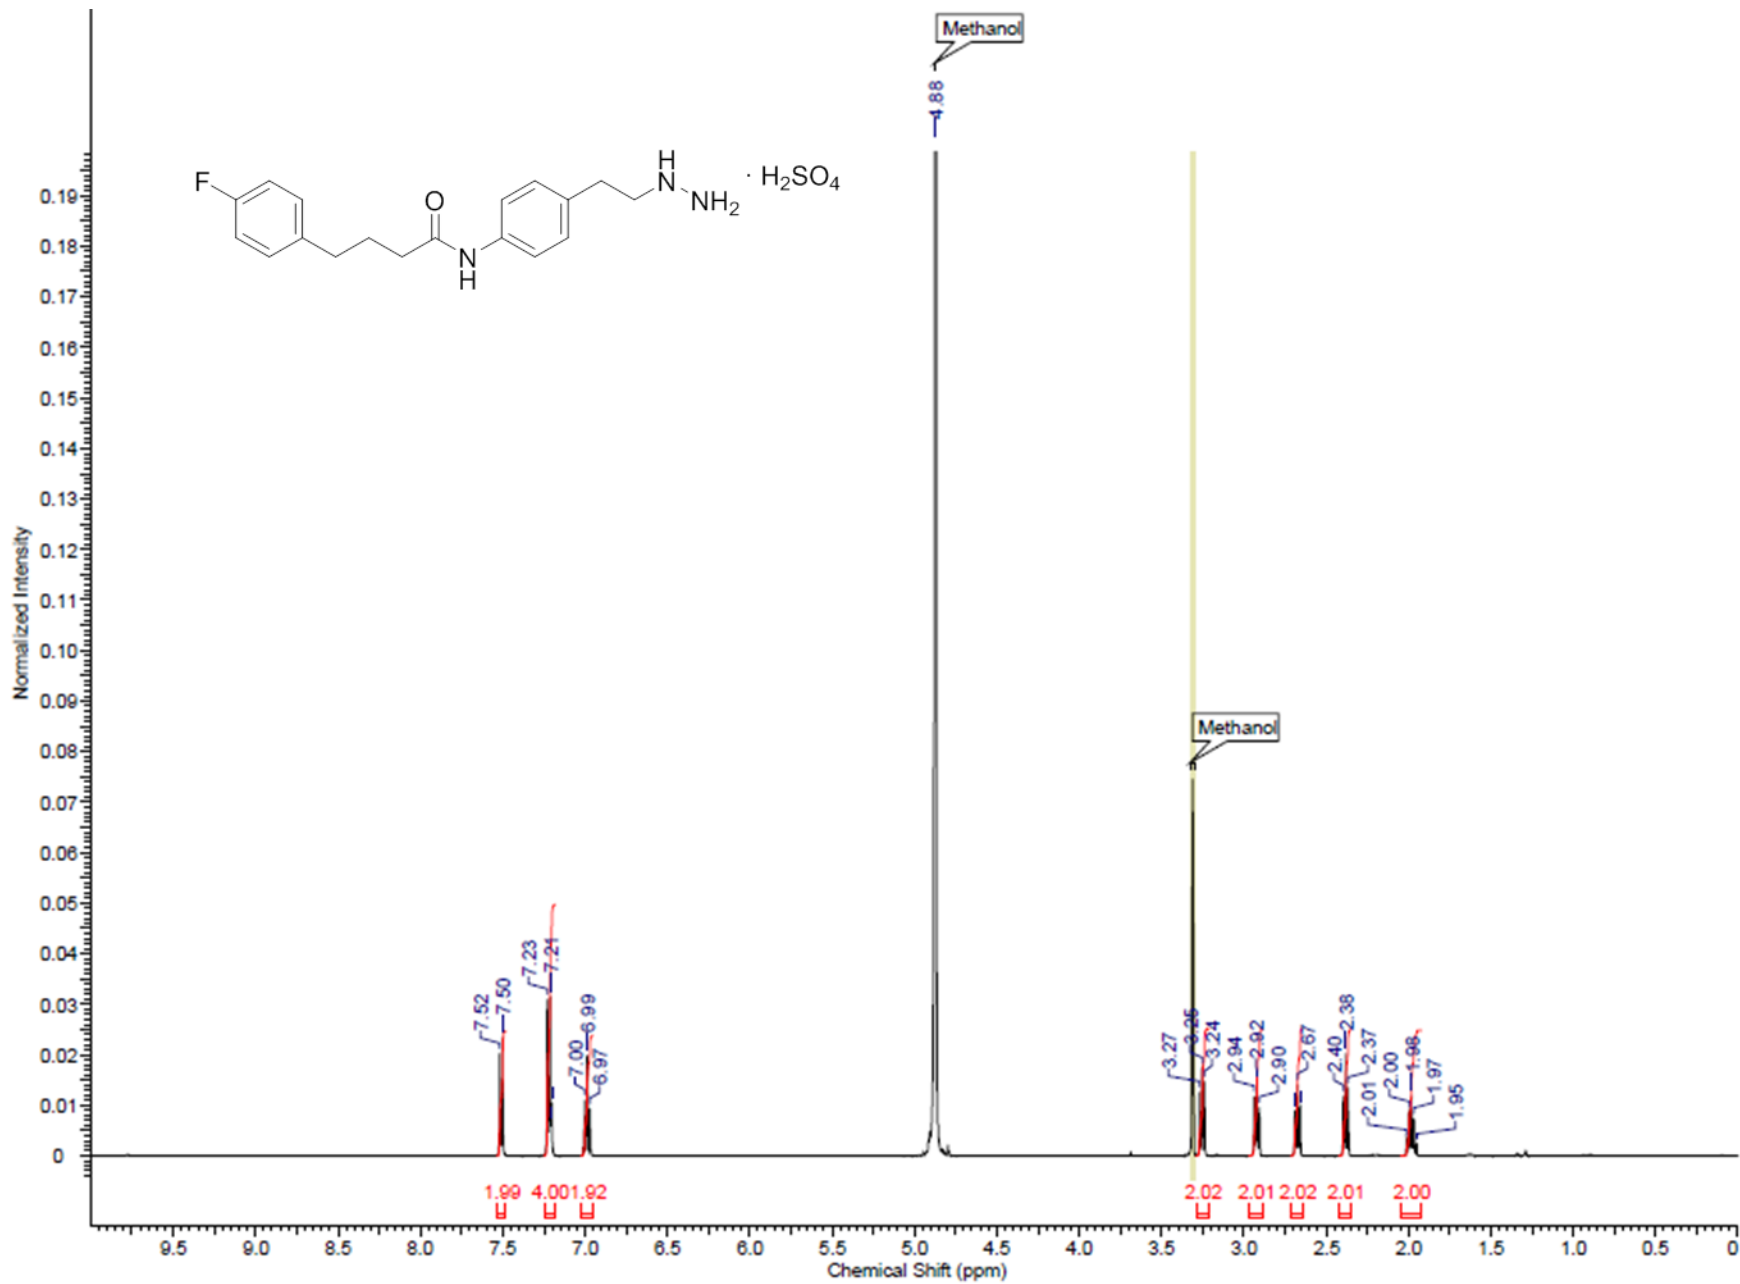

12g -  $^{13}\text{C}$  NMR

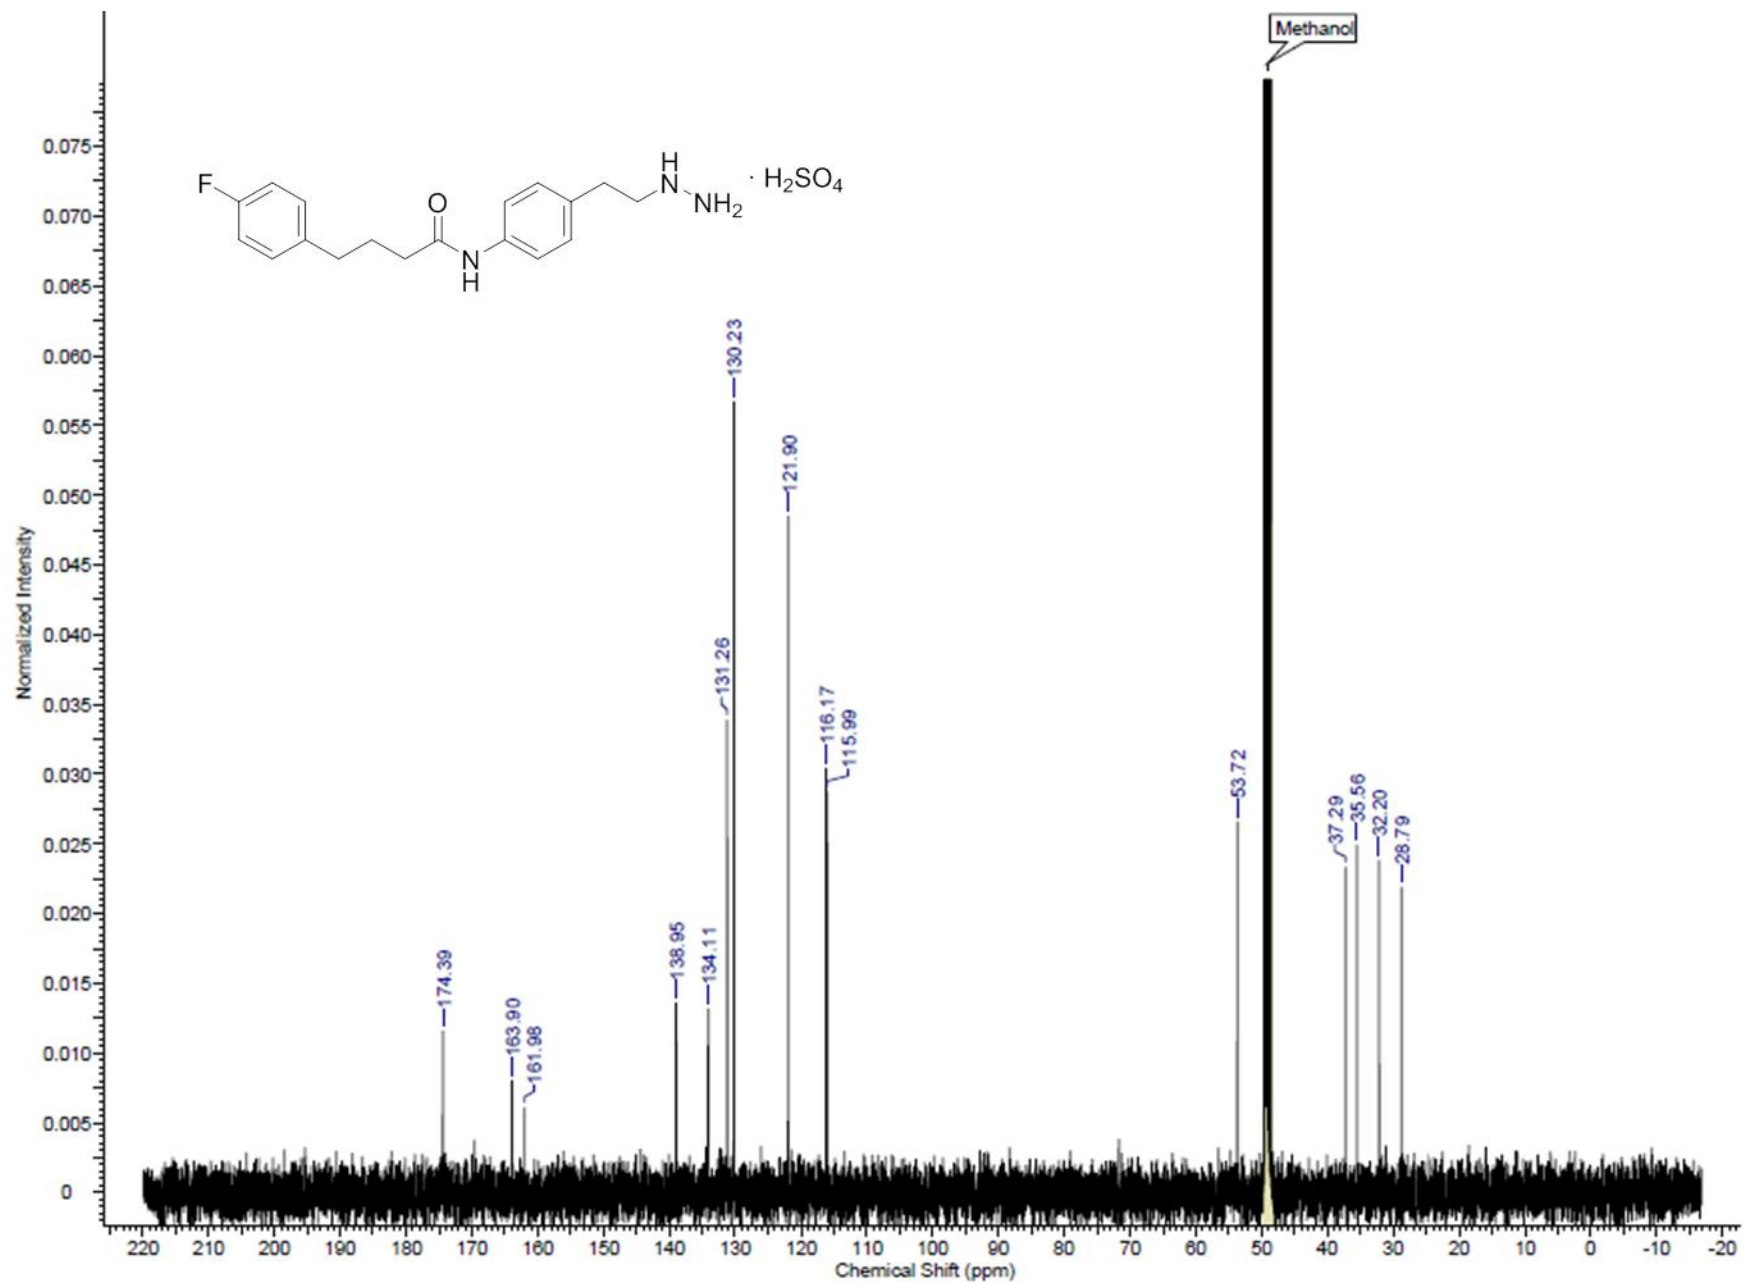



12h - <sup>1</sup>H NMR

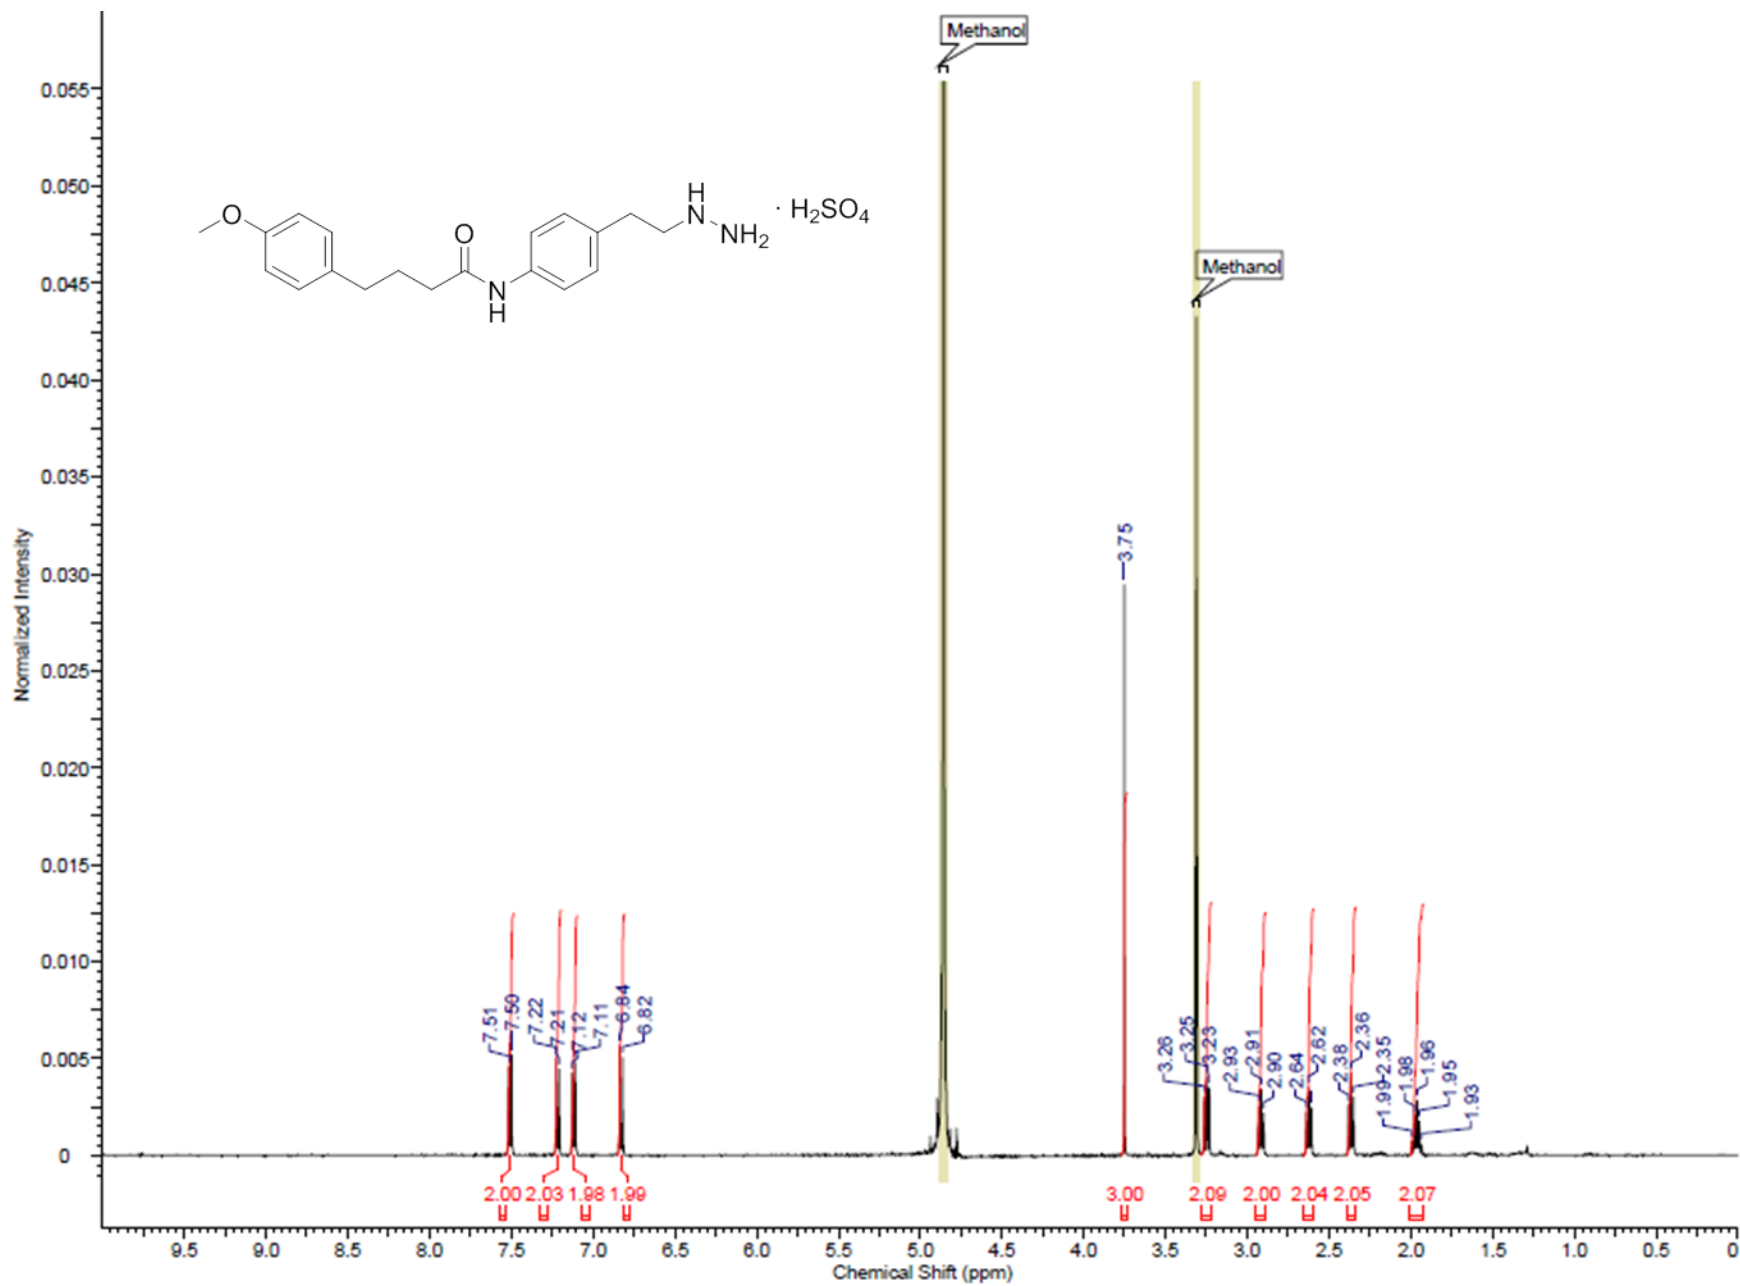

12h - <sup>13</sup>C NMR

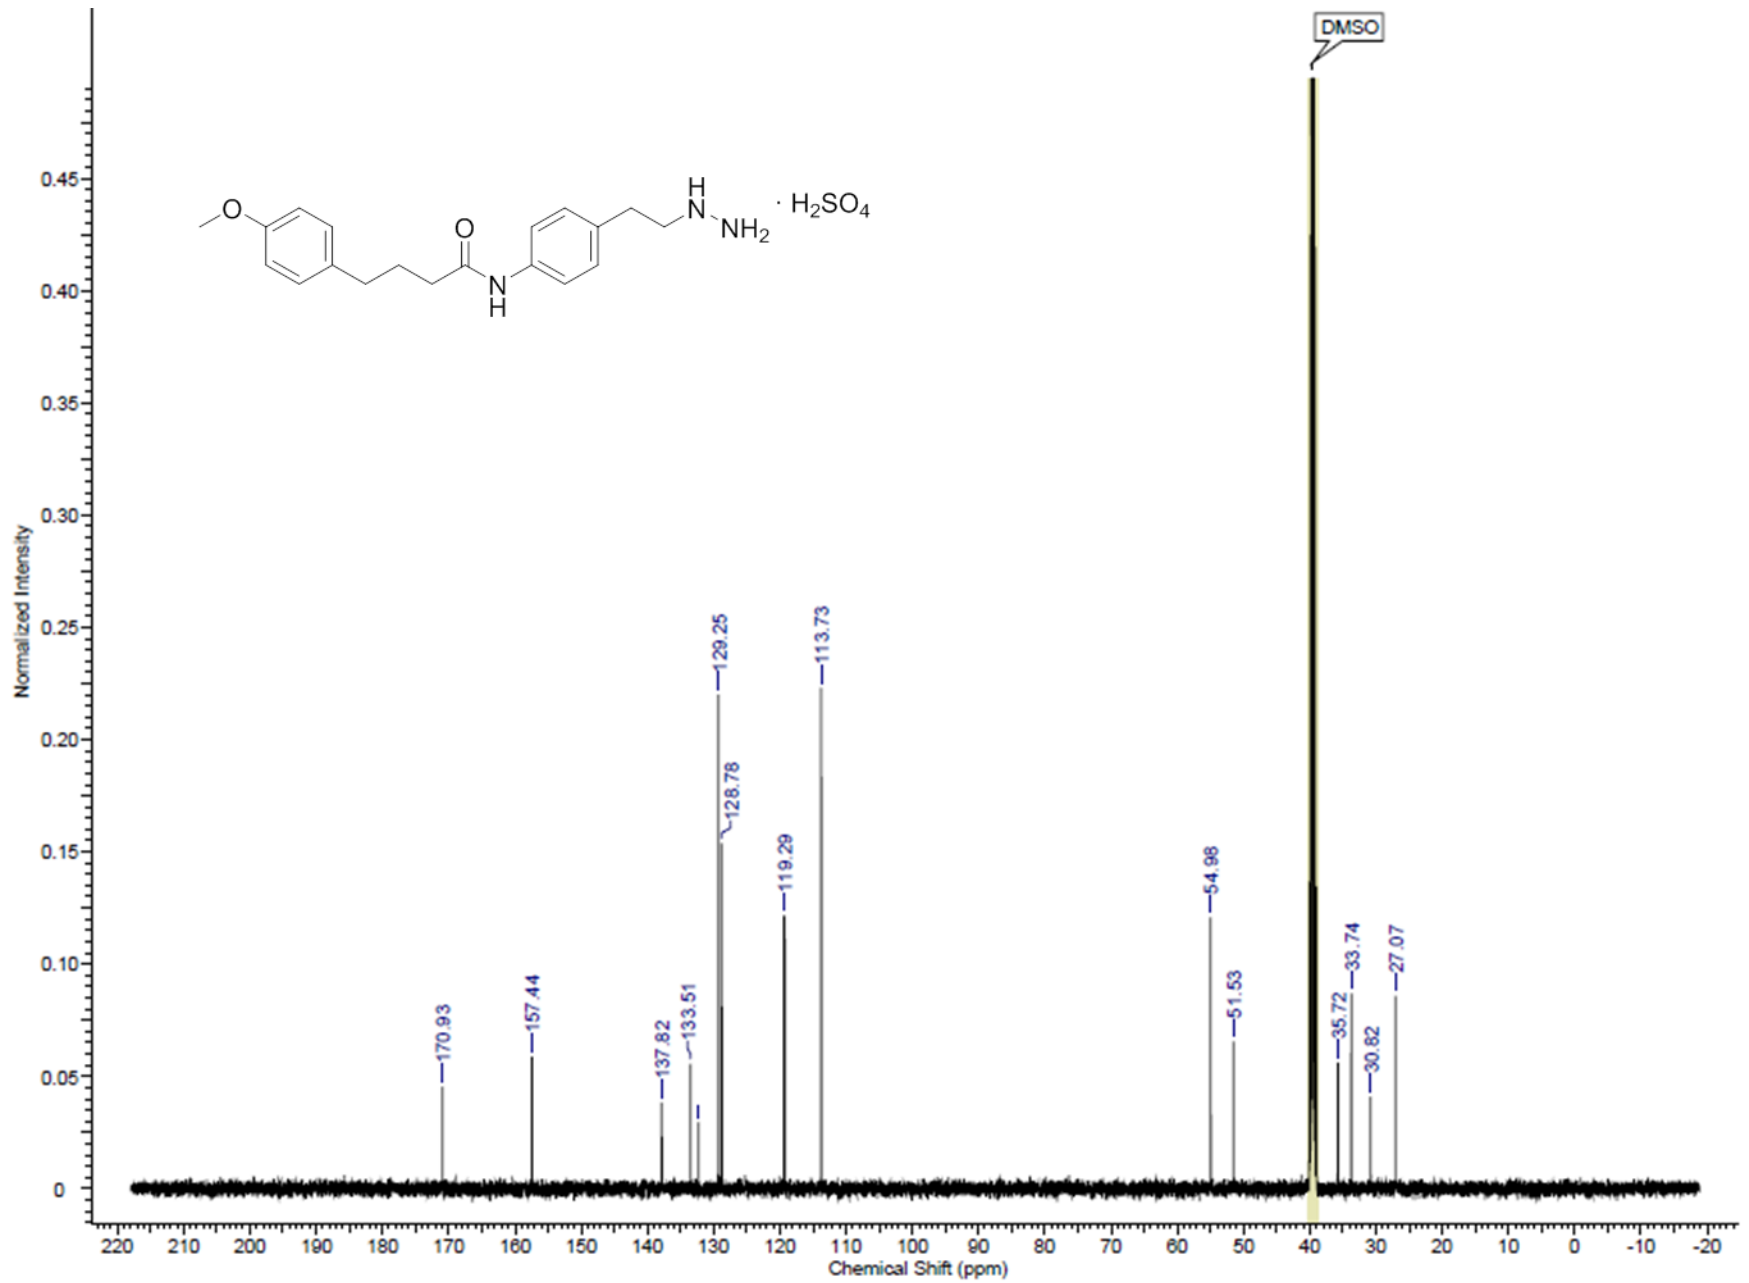

12i - <sup>1</sup>H NMR

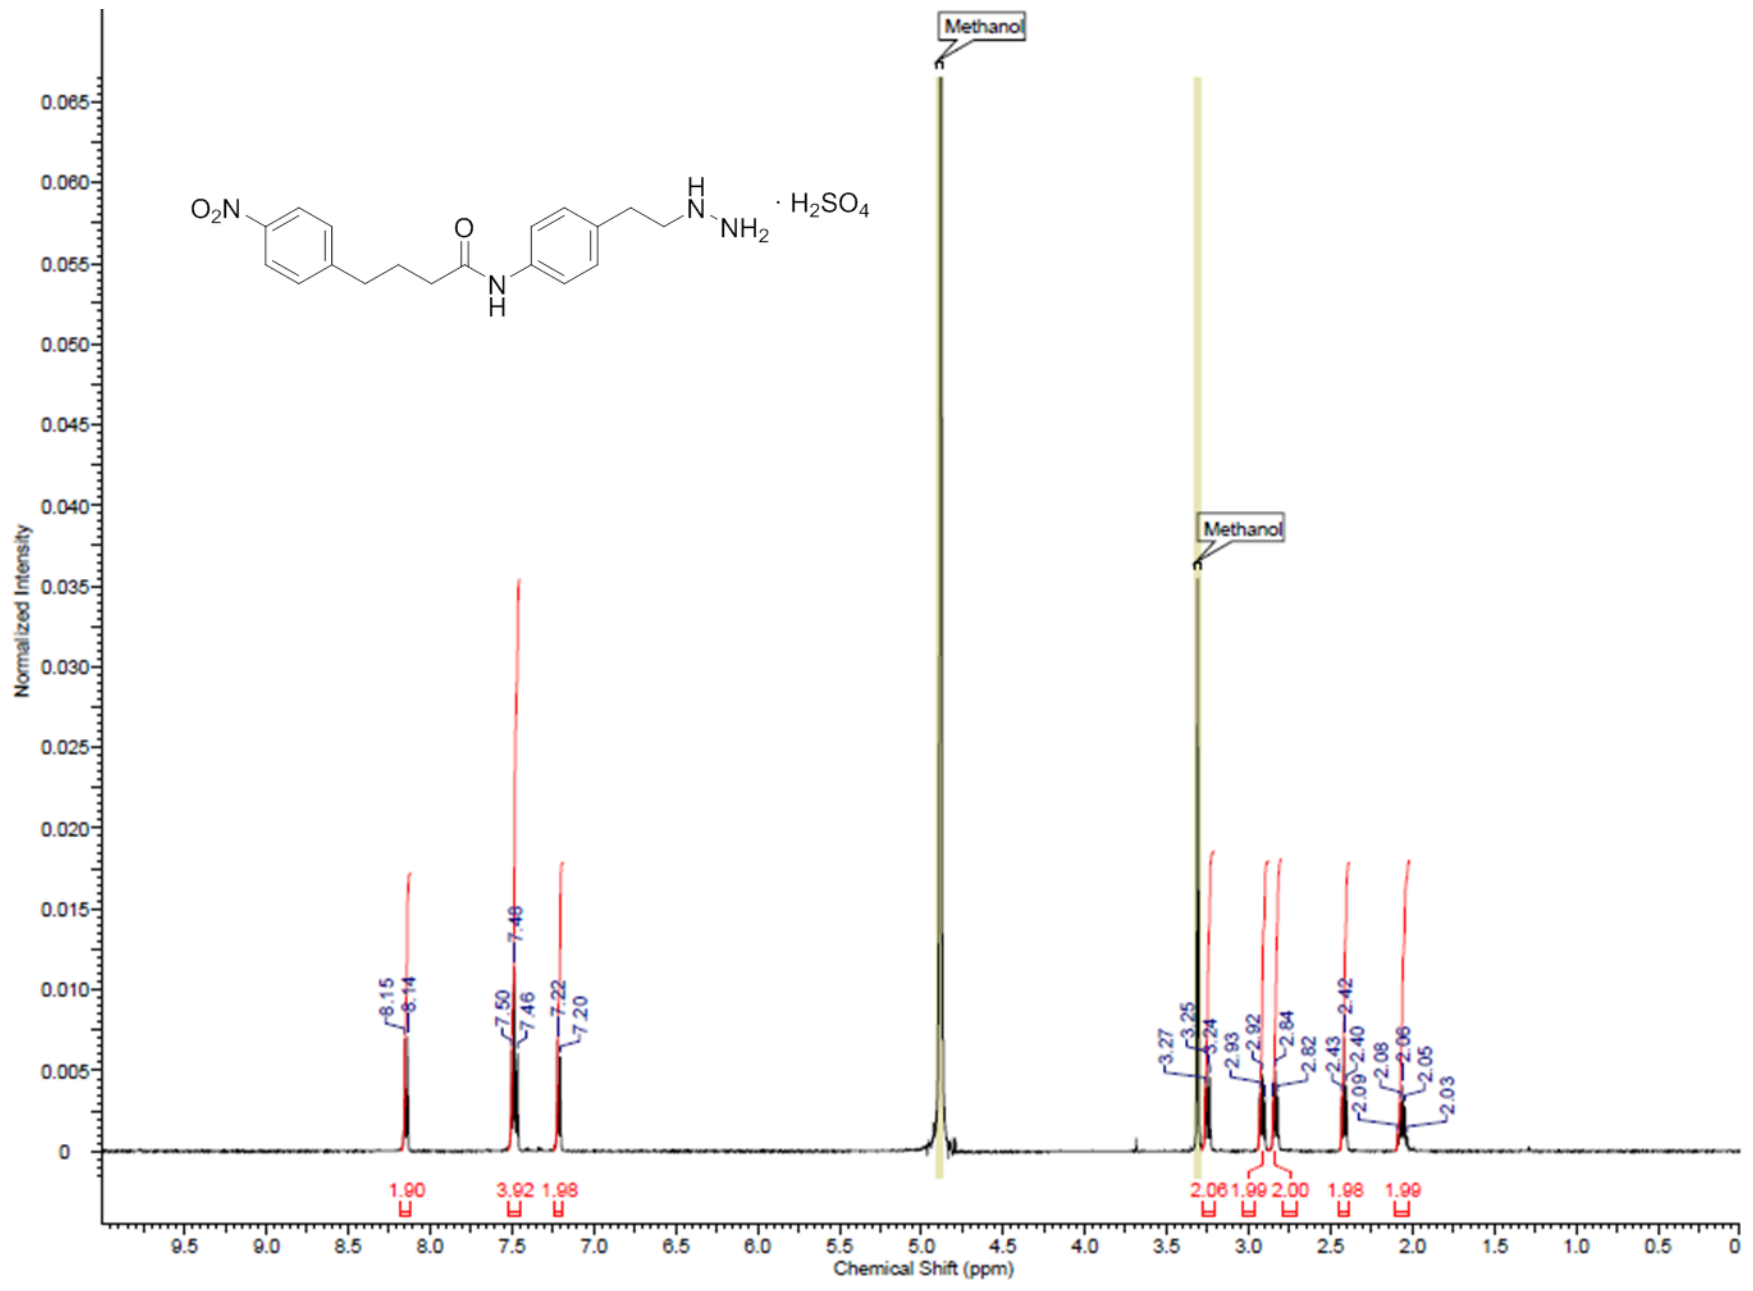

12i - <sup>13</sup>C NMR

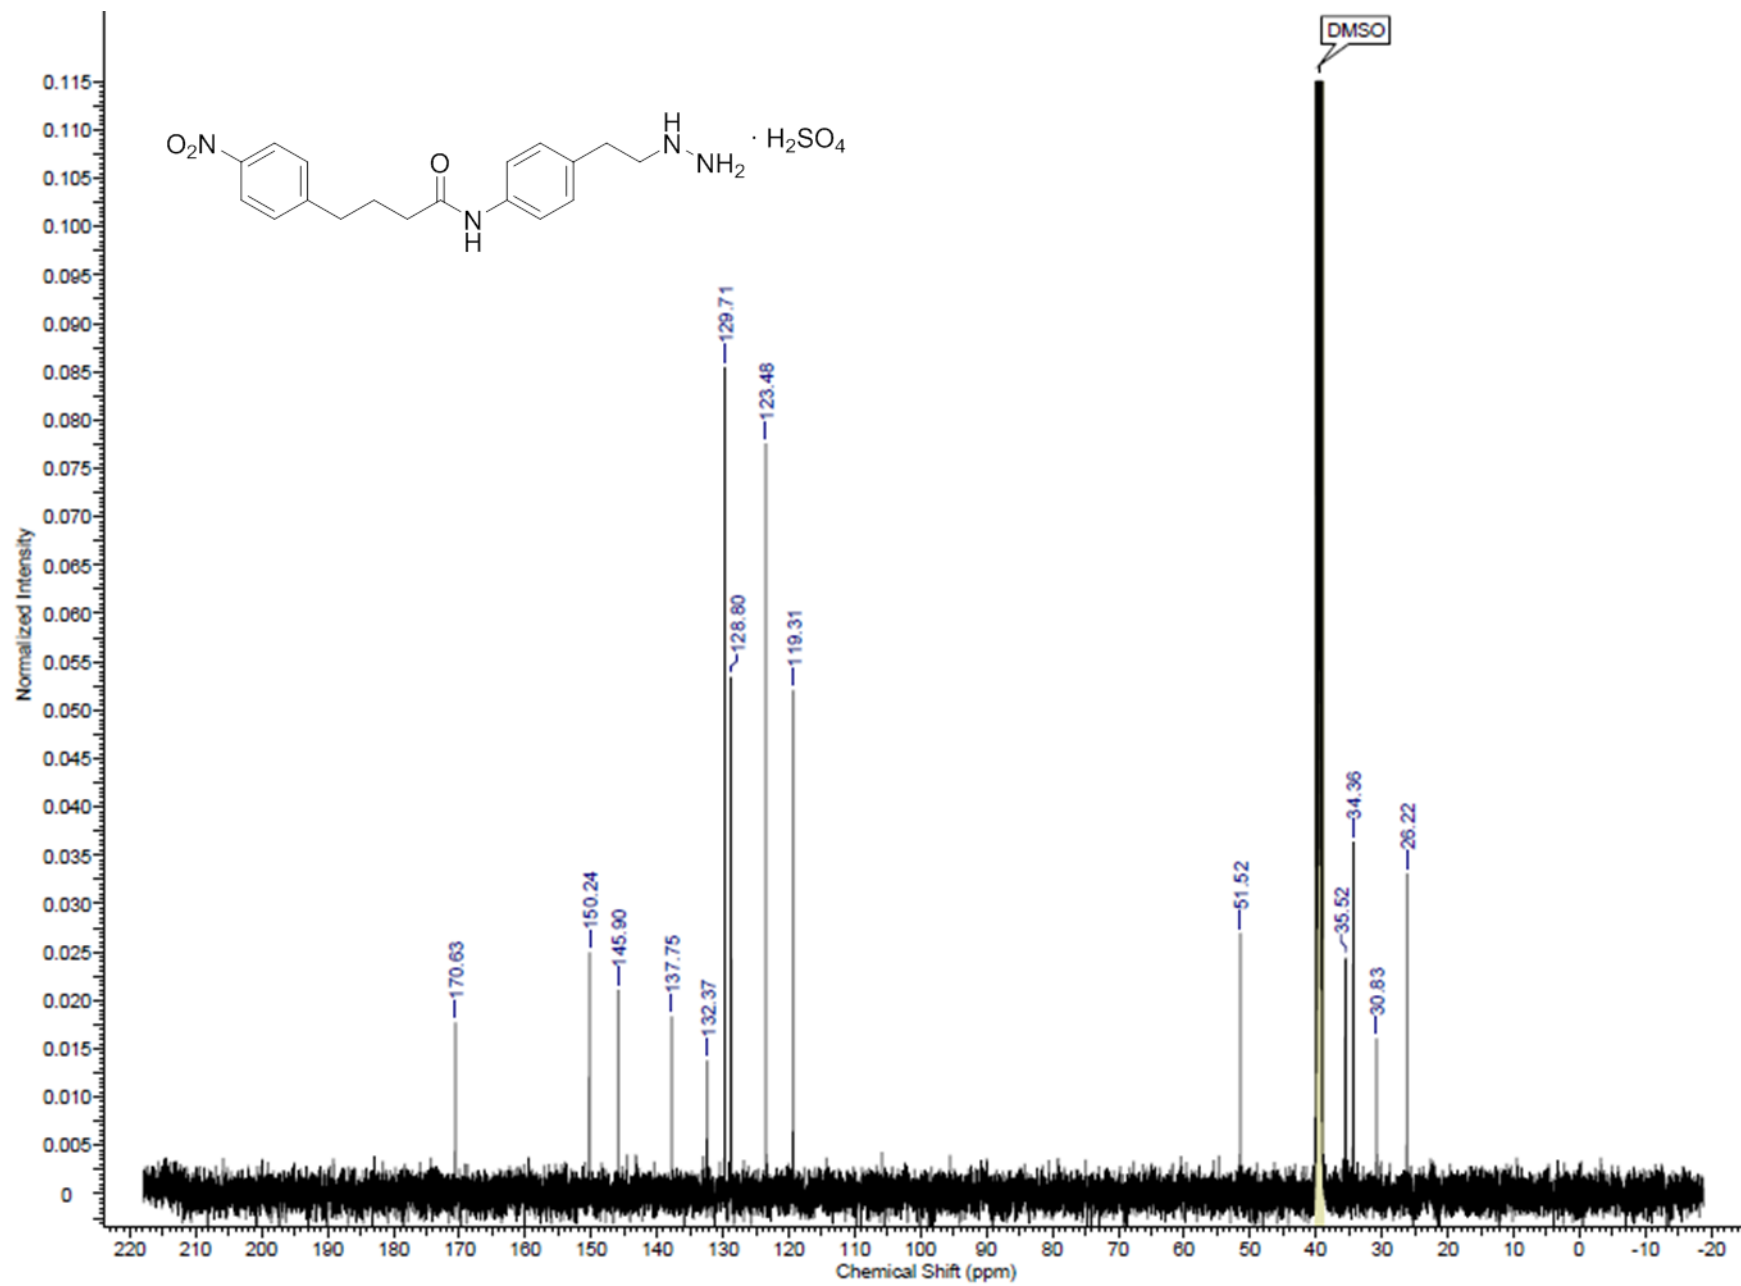

12j - <sup>1</sup>H NMR

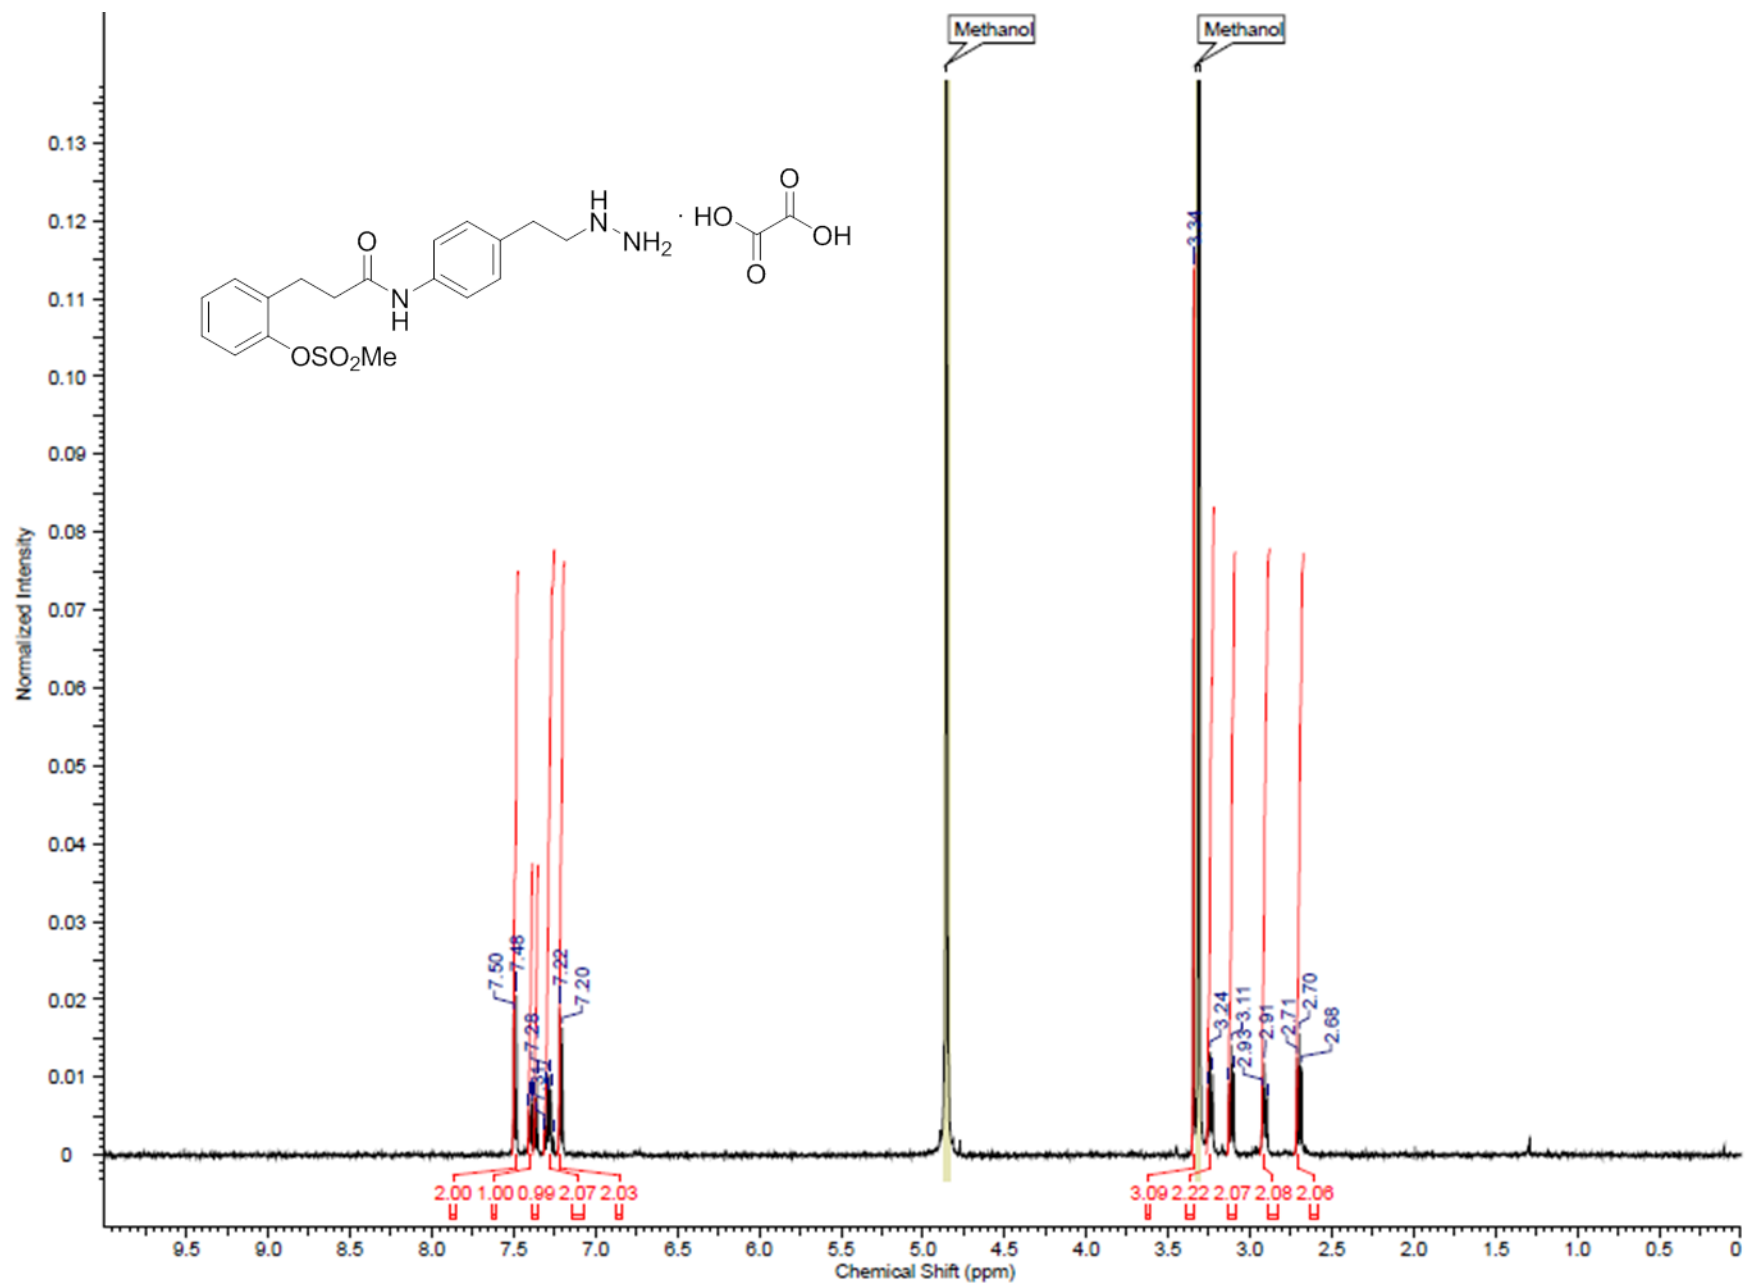

12j - <sup>13</sup>C NMR

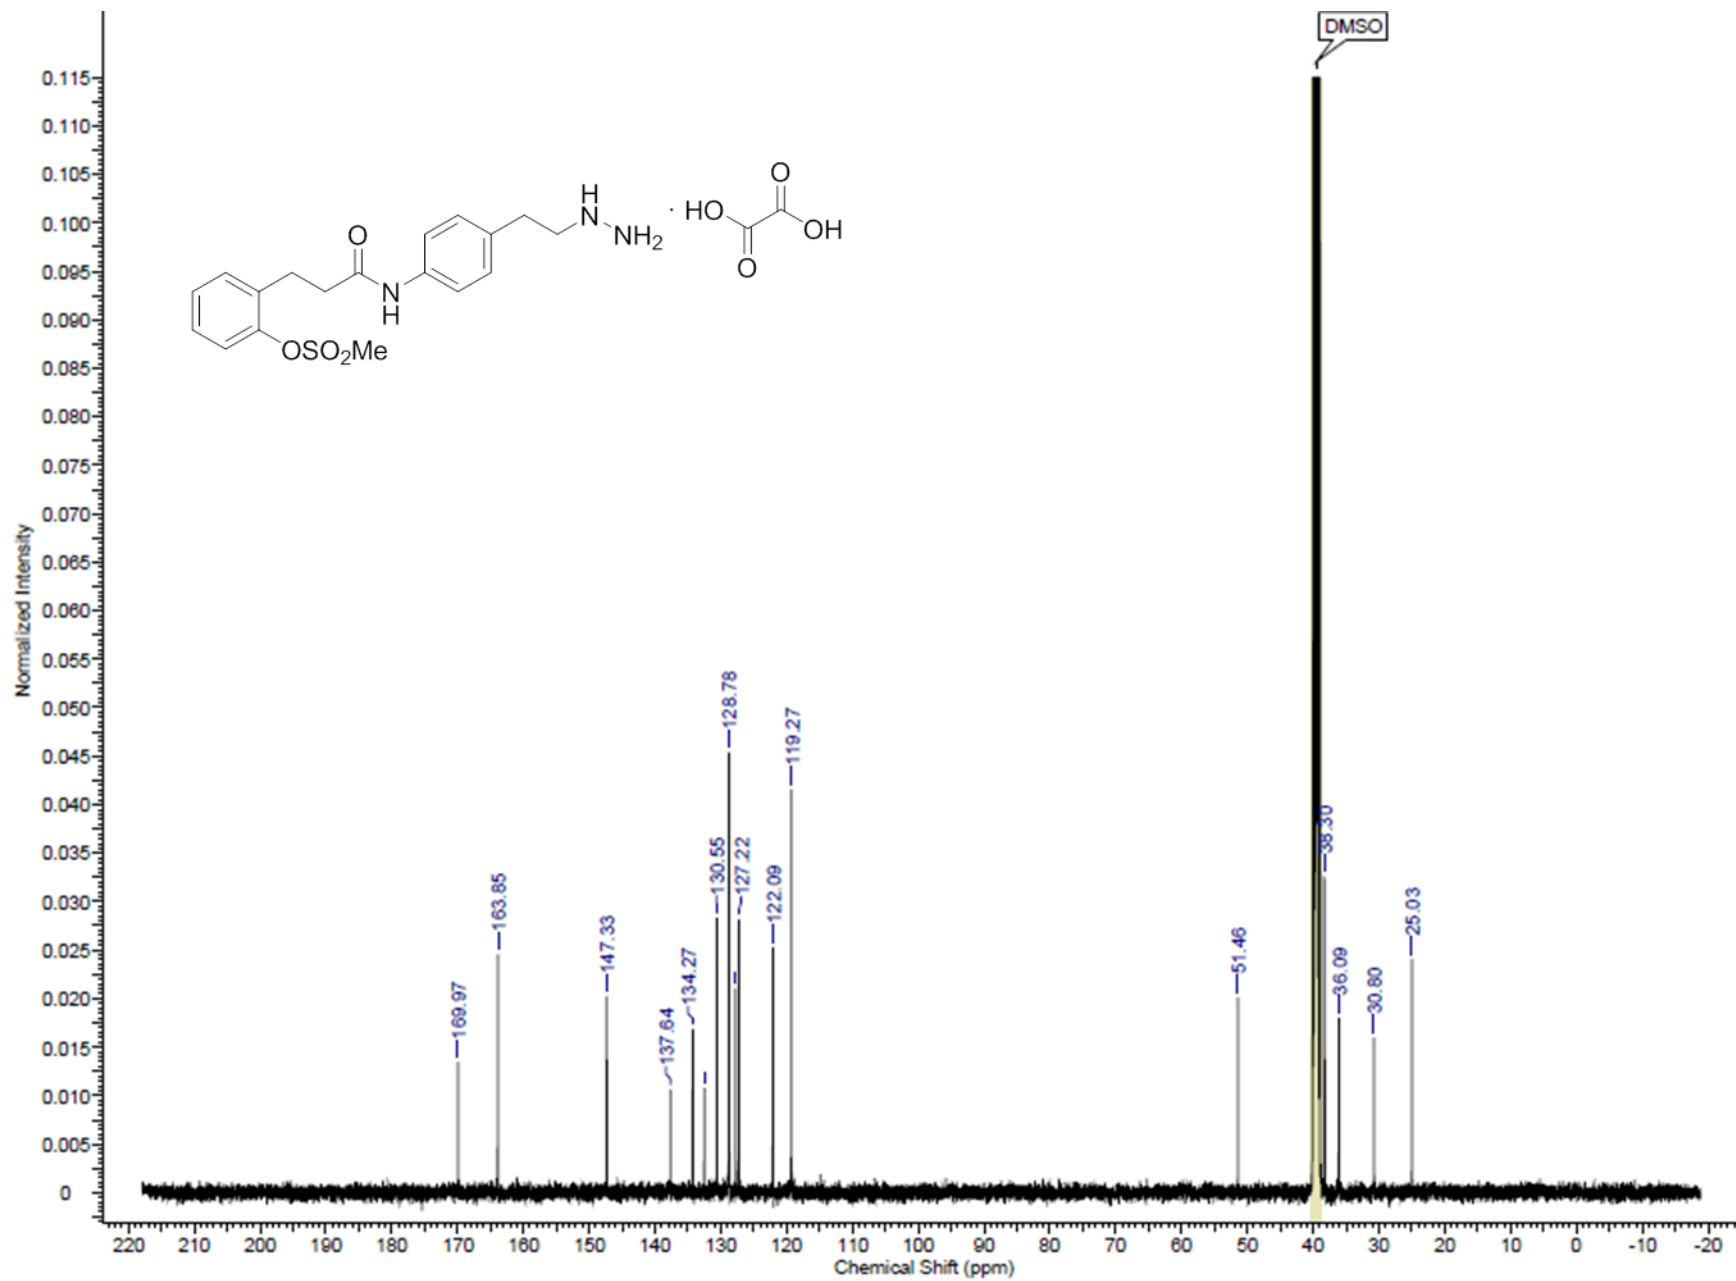

12k - <sup>1</sup>H NMR

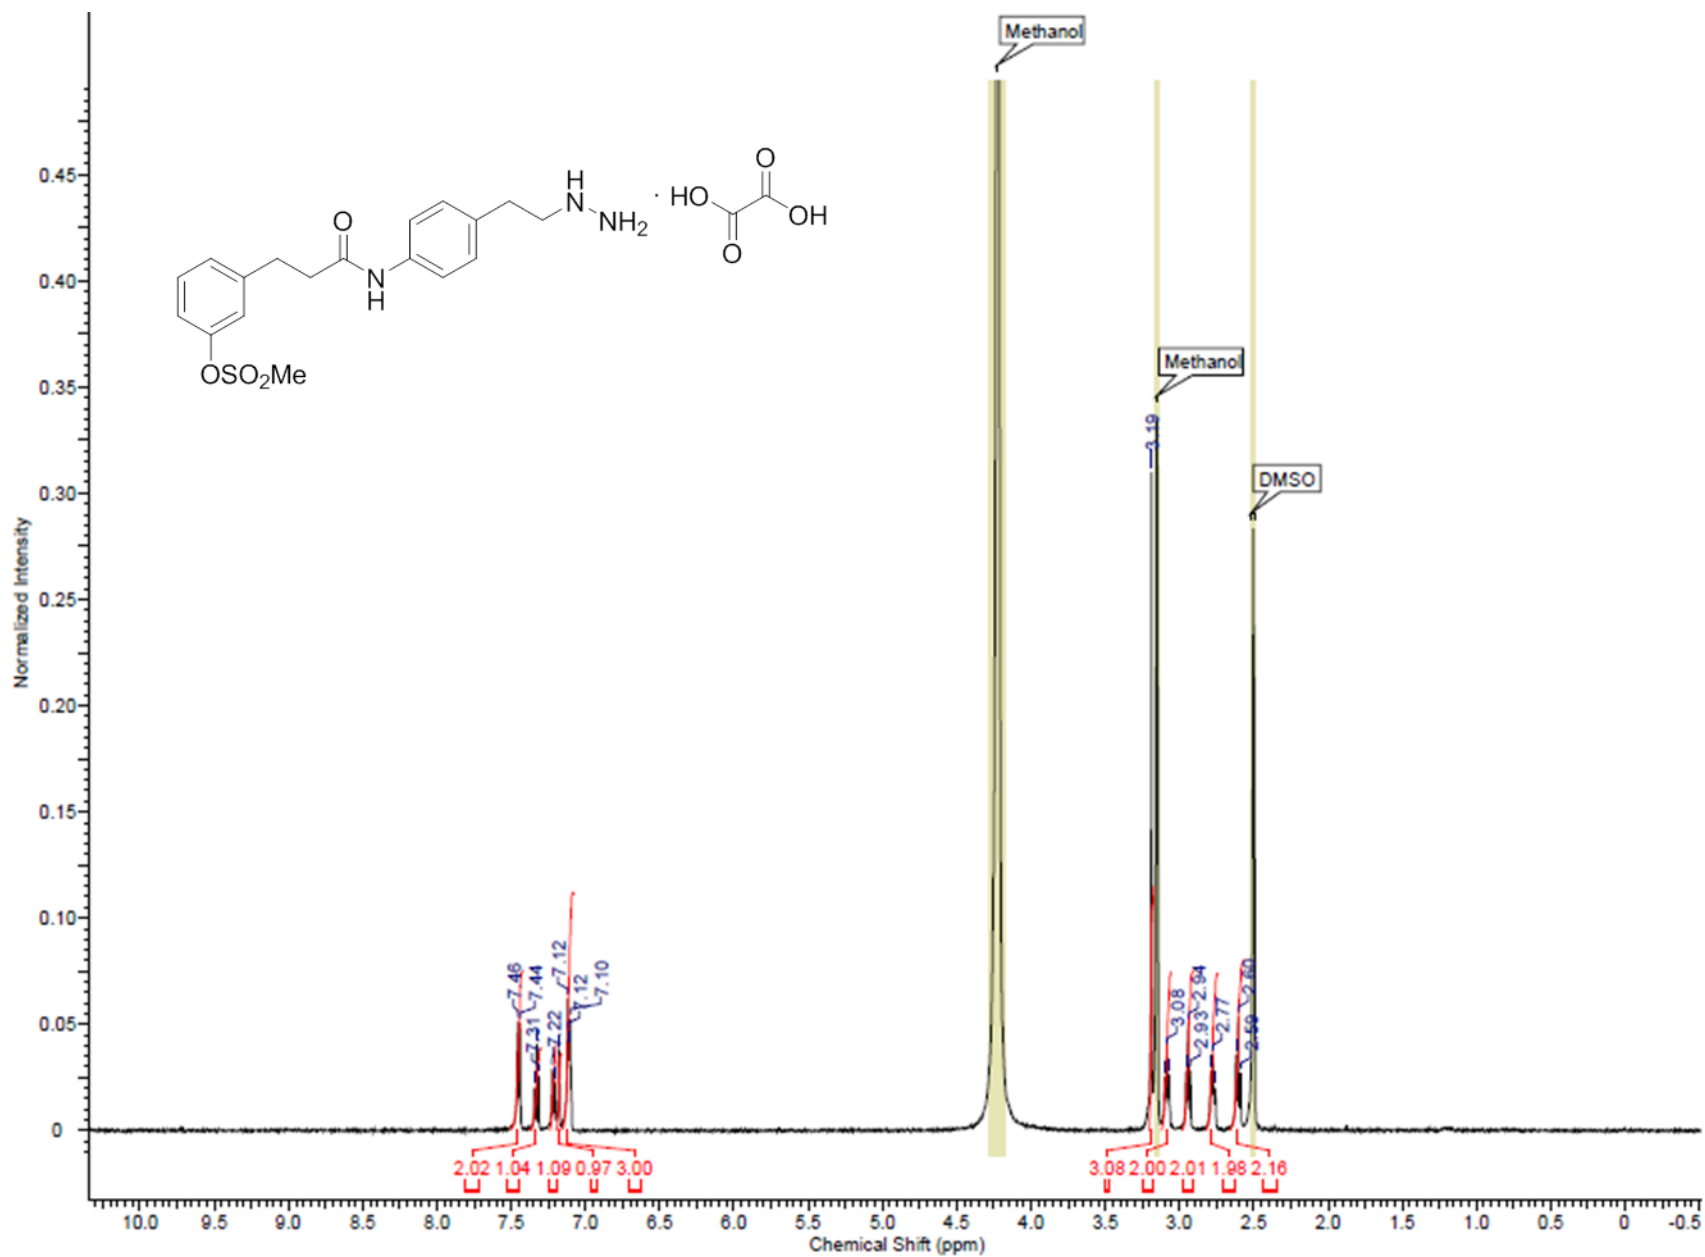

12k - <sup>13</sup>C NMR

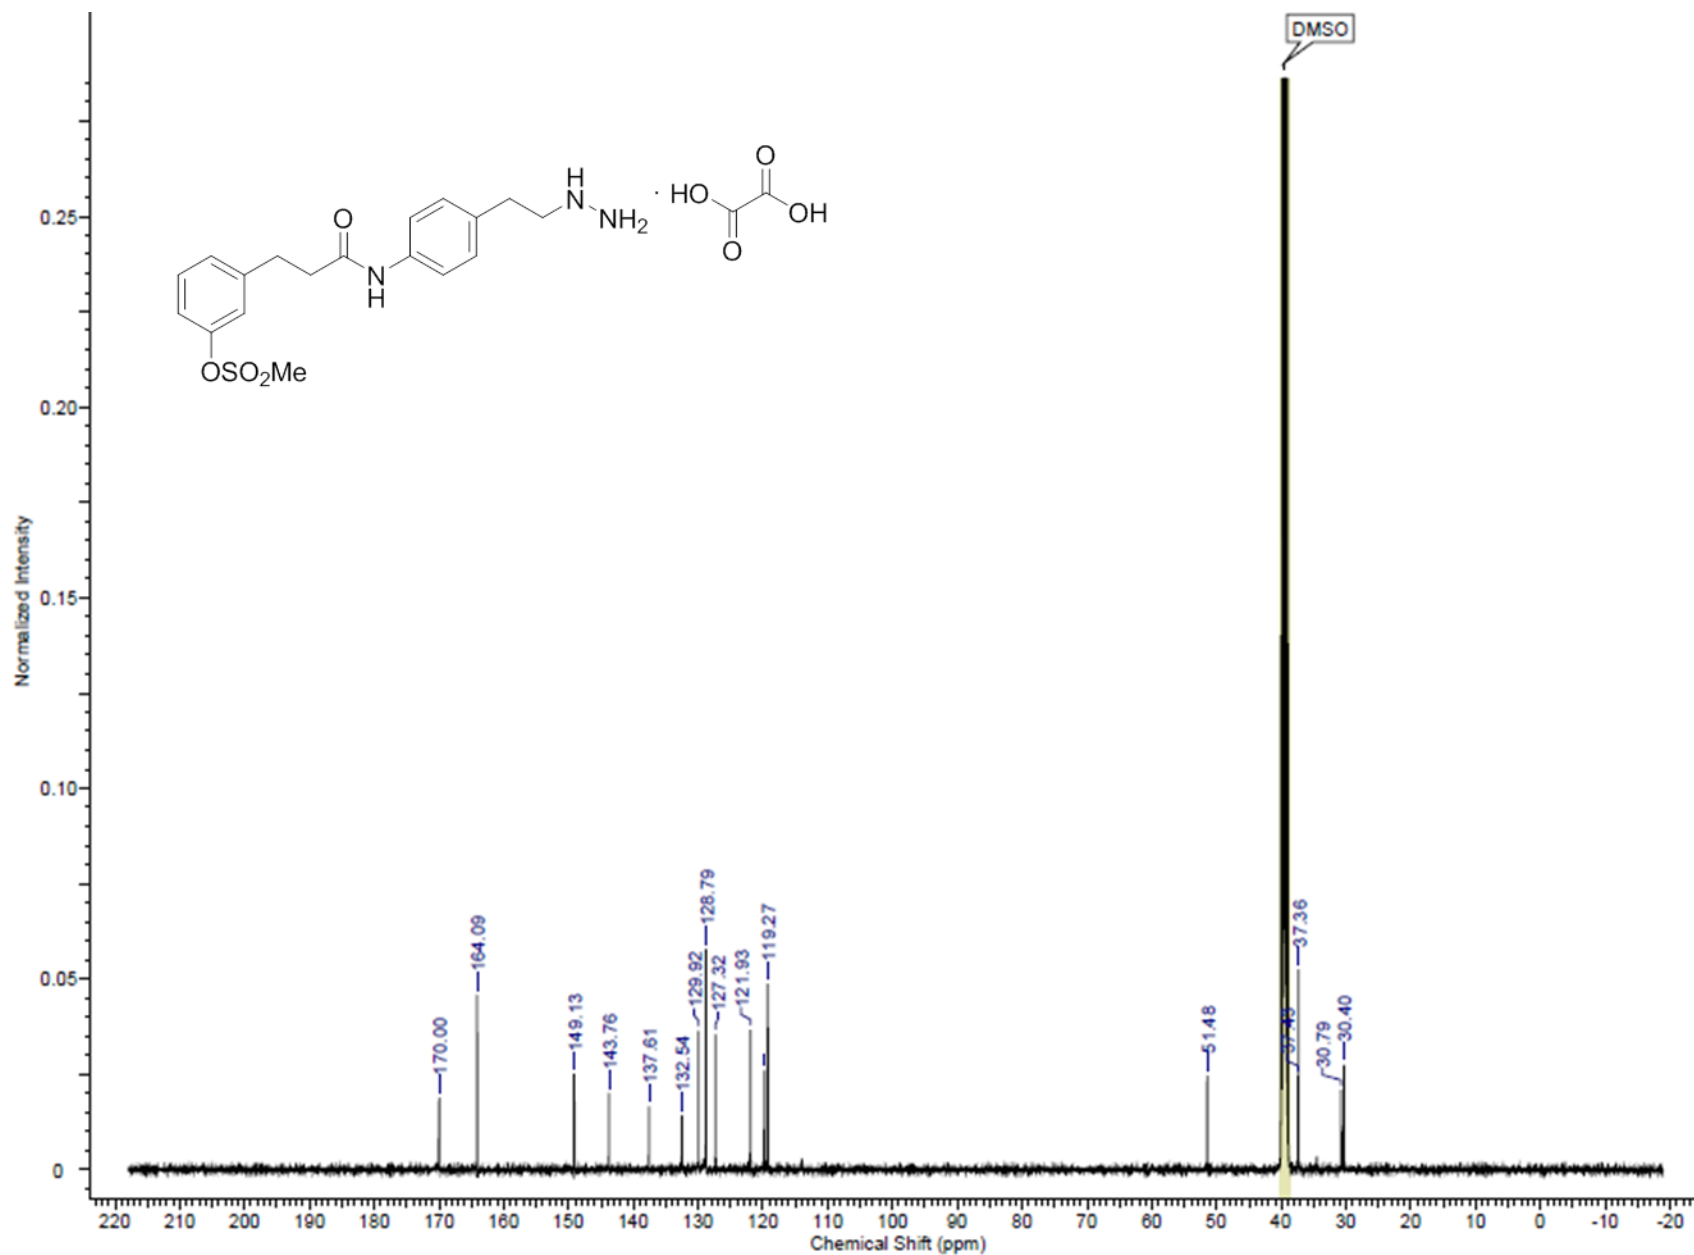



12I - <sup>1</sup>H NMR

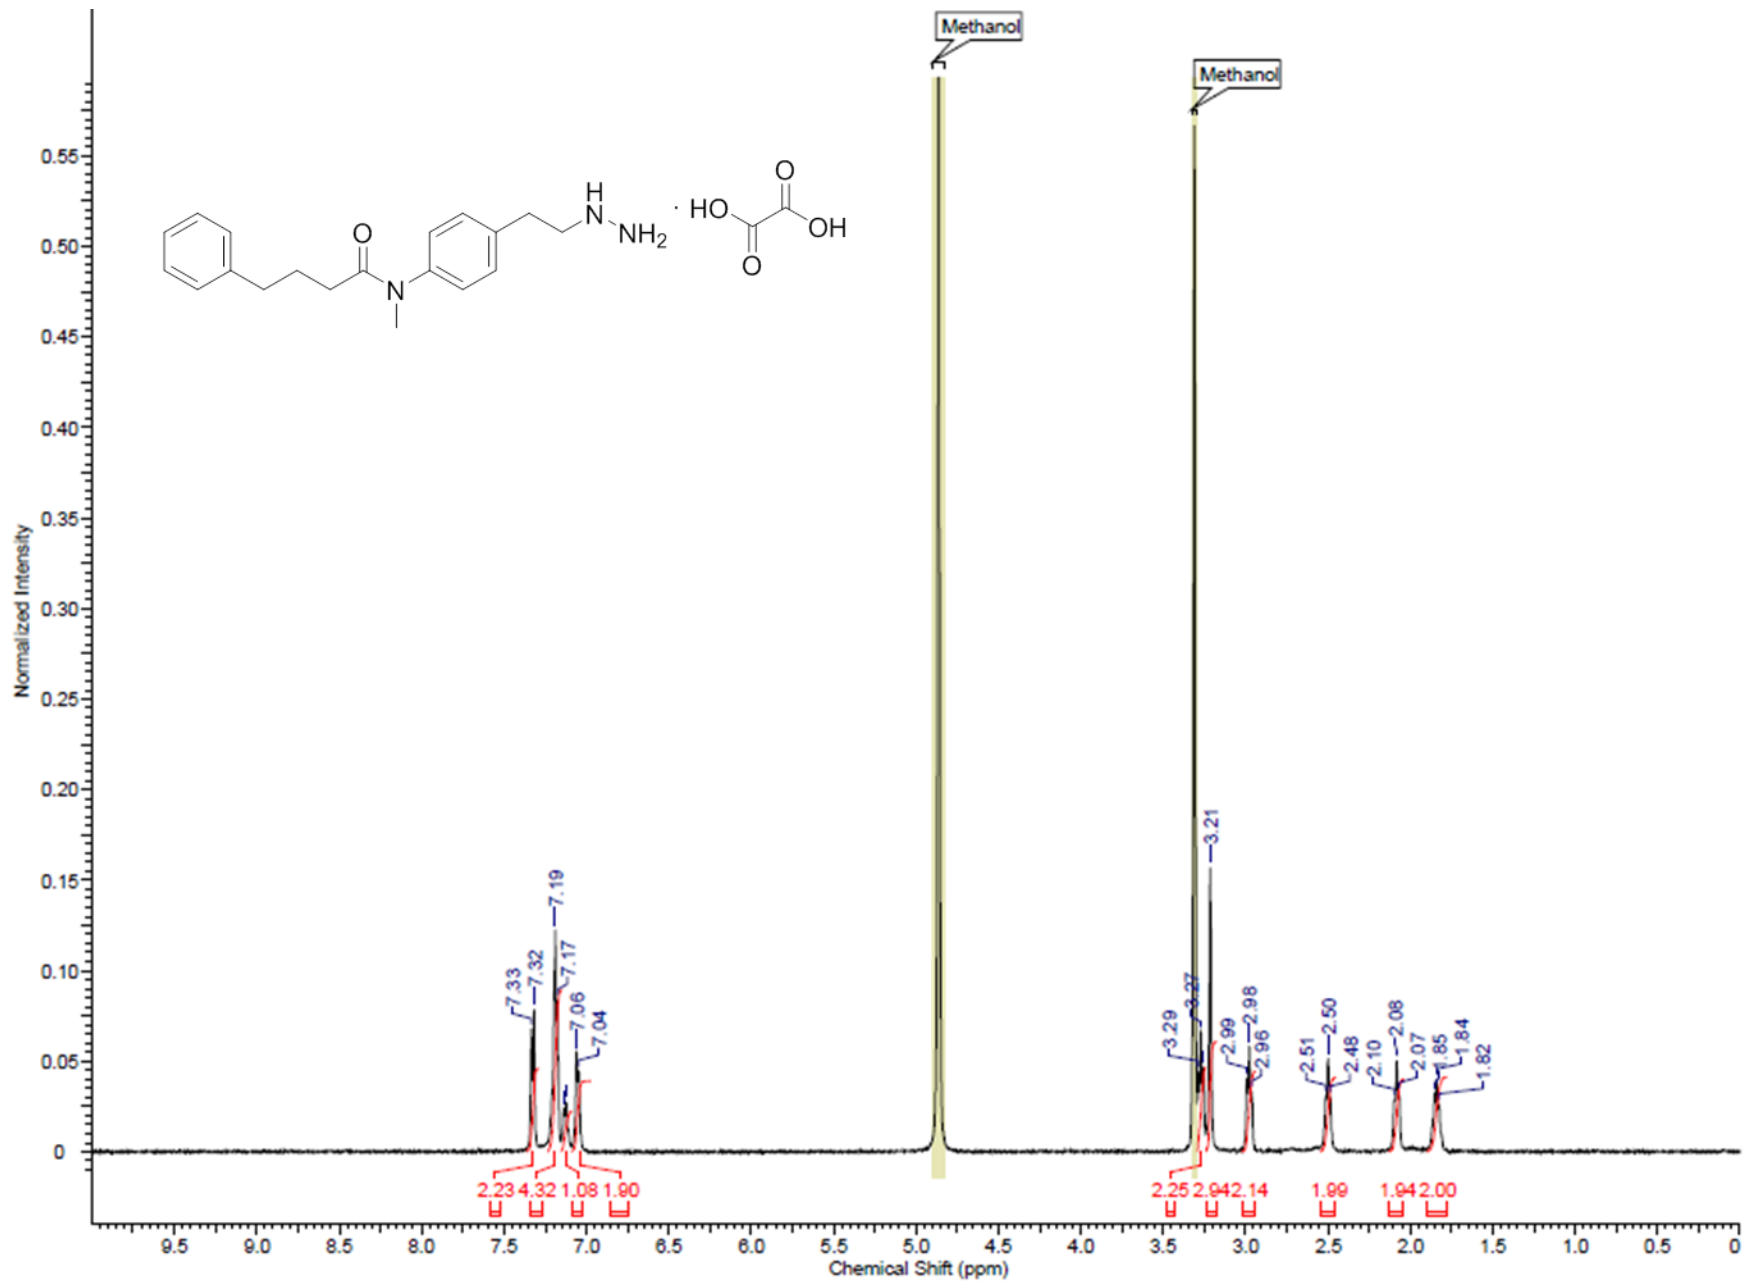

12I - <sup>13</sup>C NMR

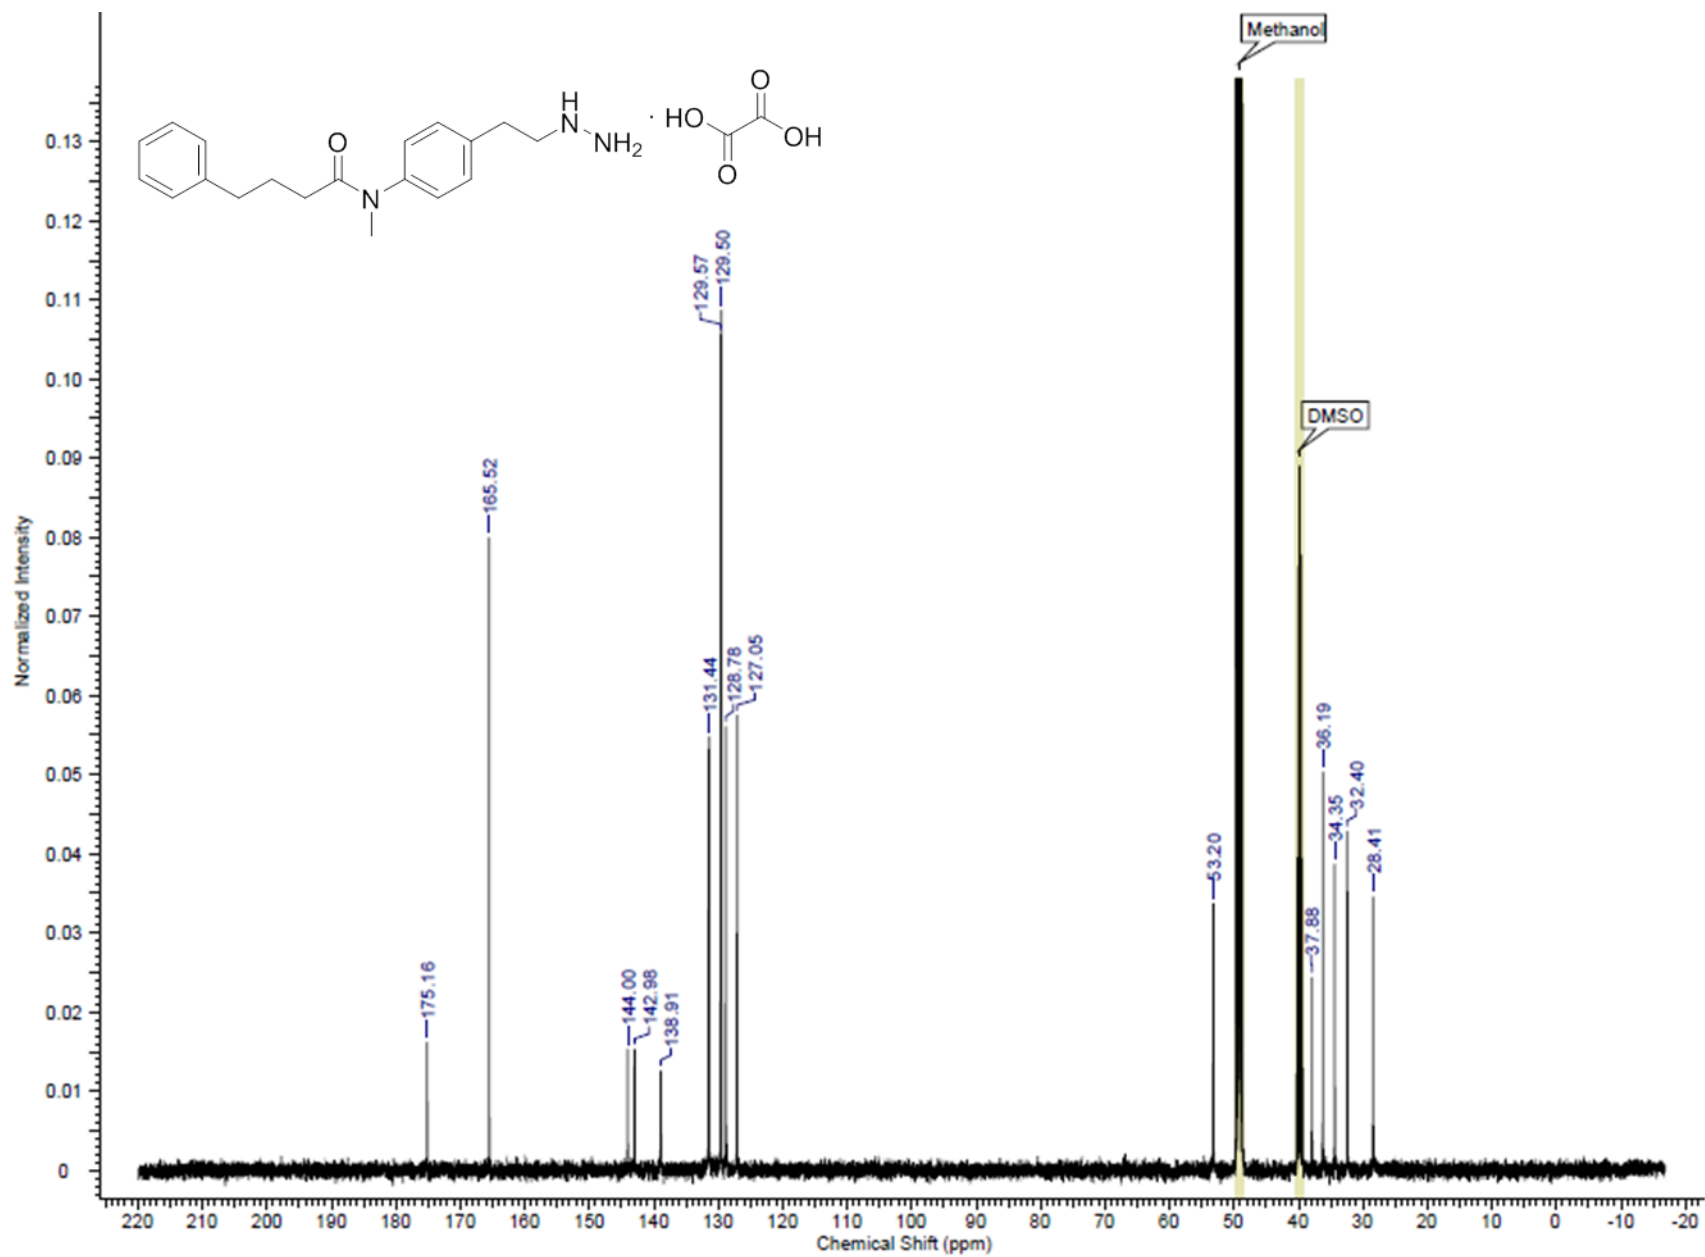

12m - <sup>1</sup>H NMR

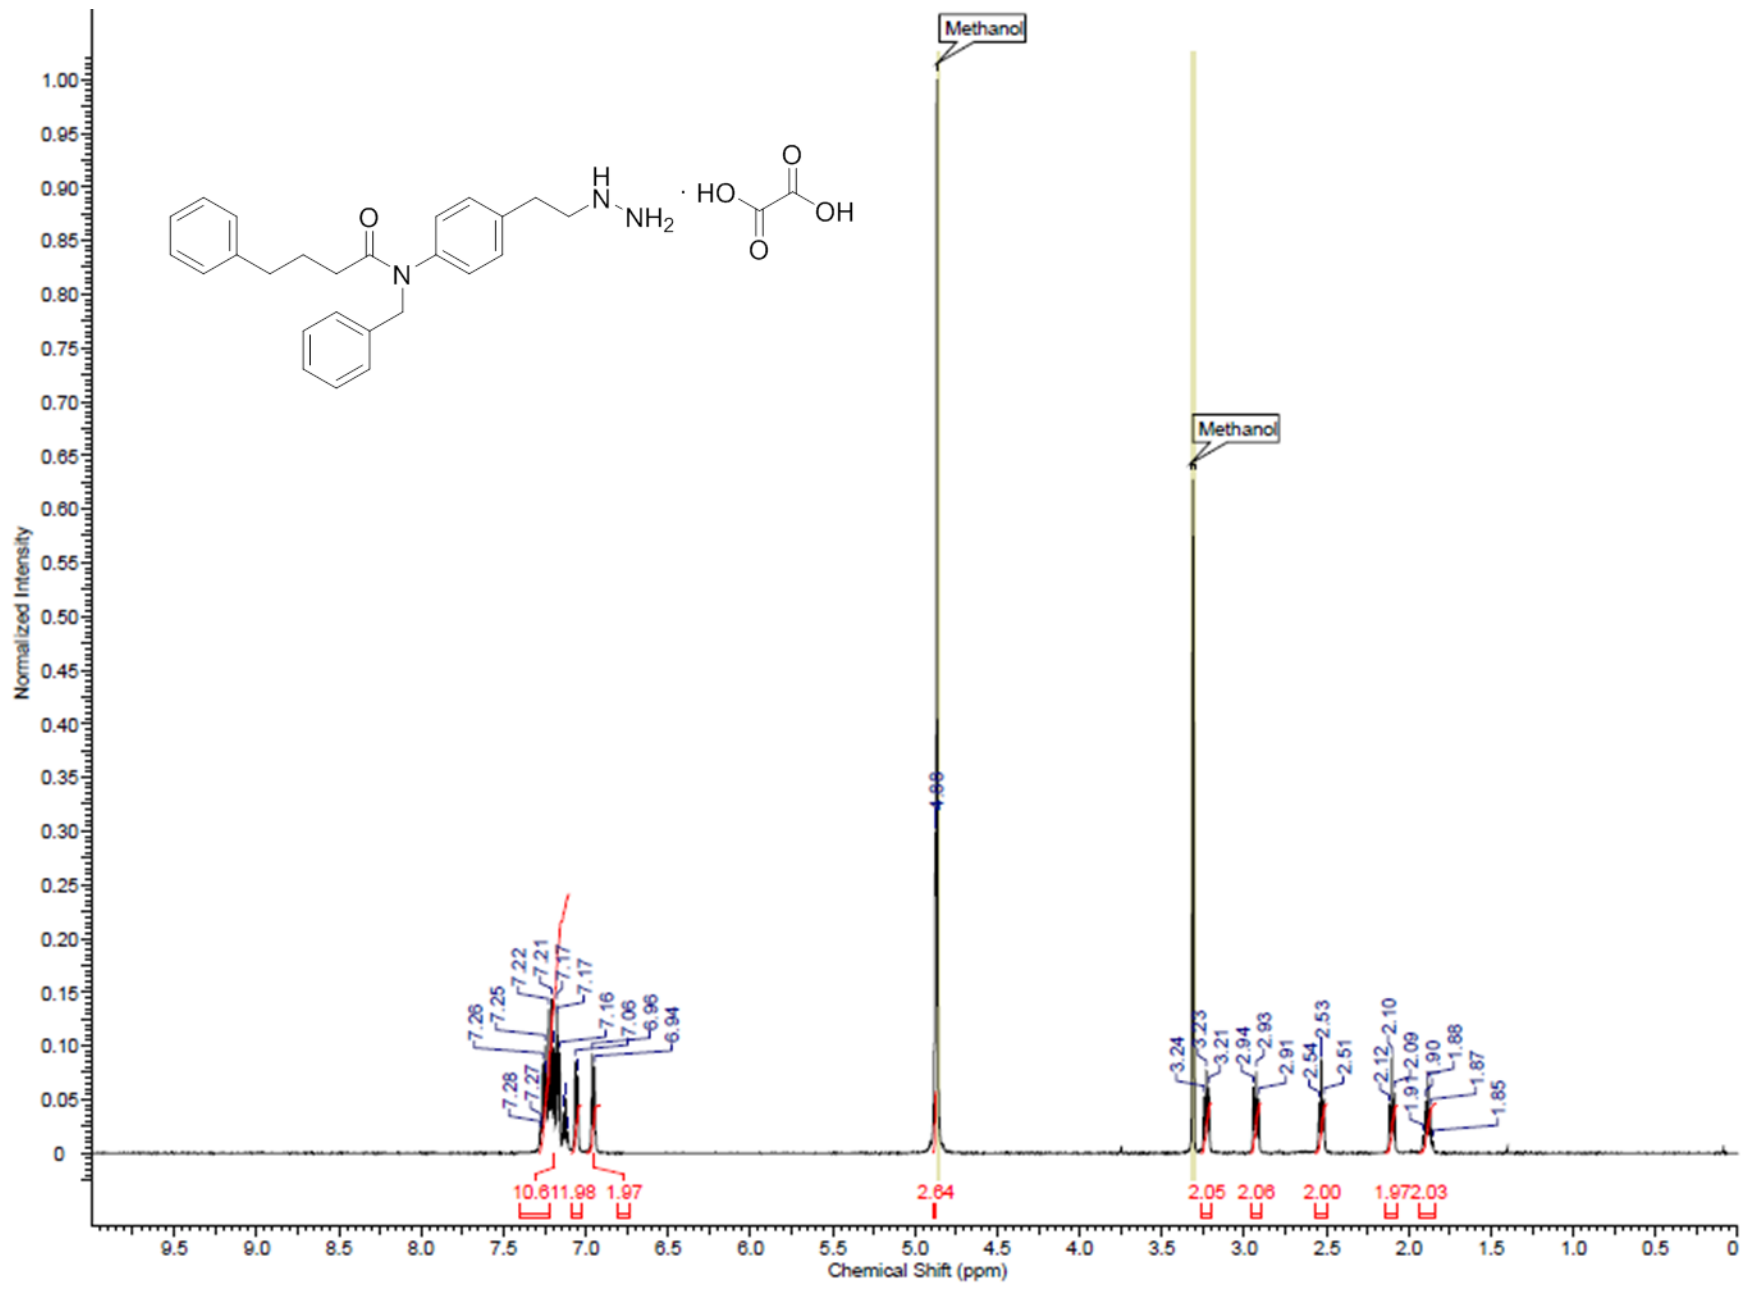

12m - <sup>13</sup>C NMR

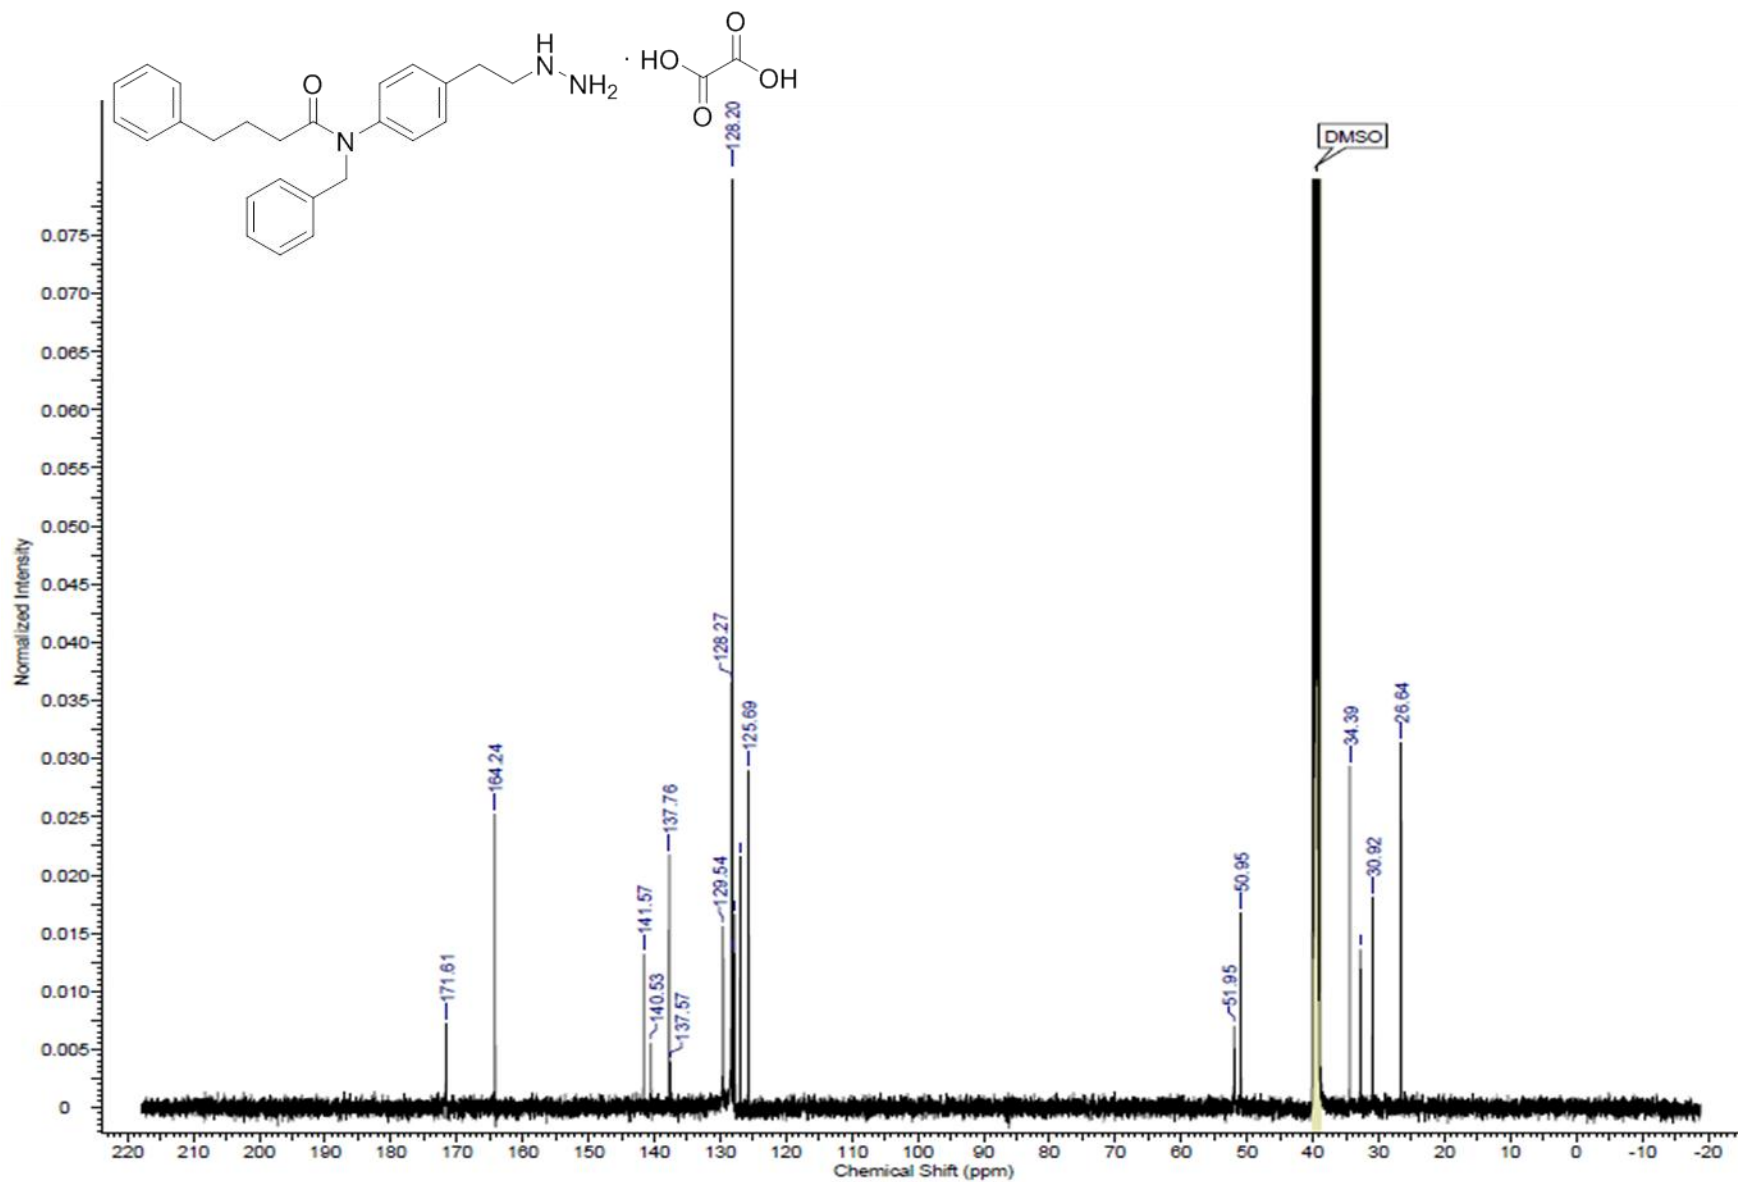

13 - <sup>1</sup>H NMR

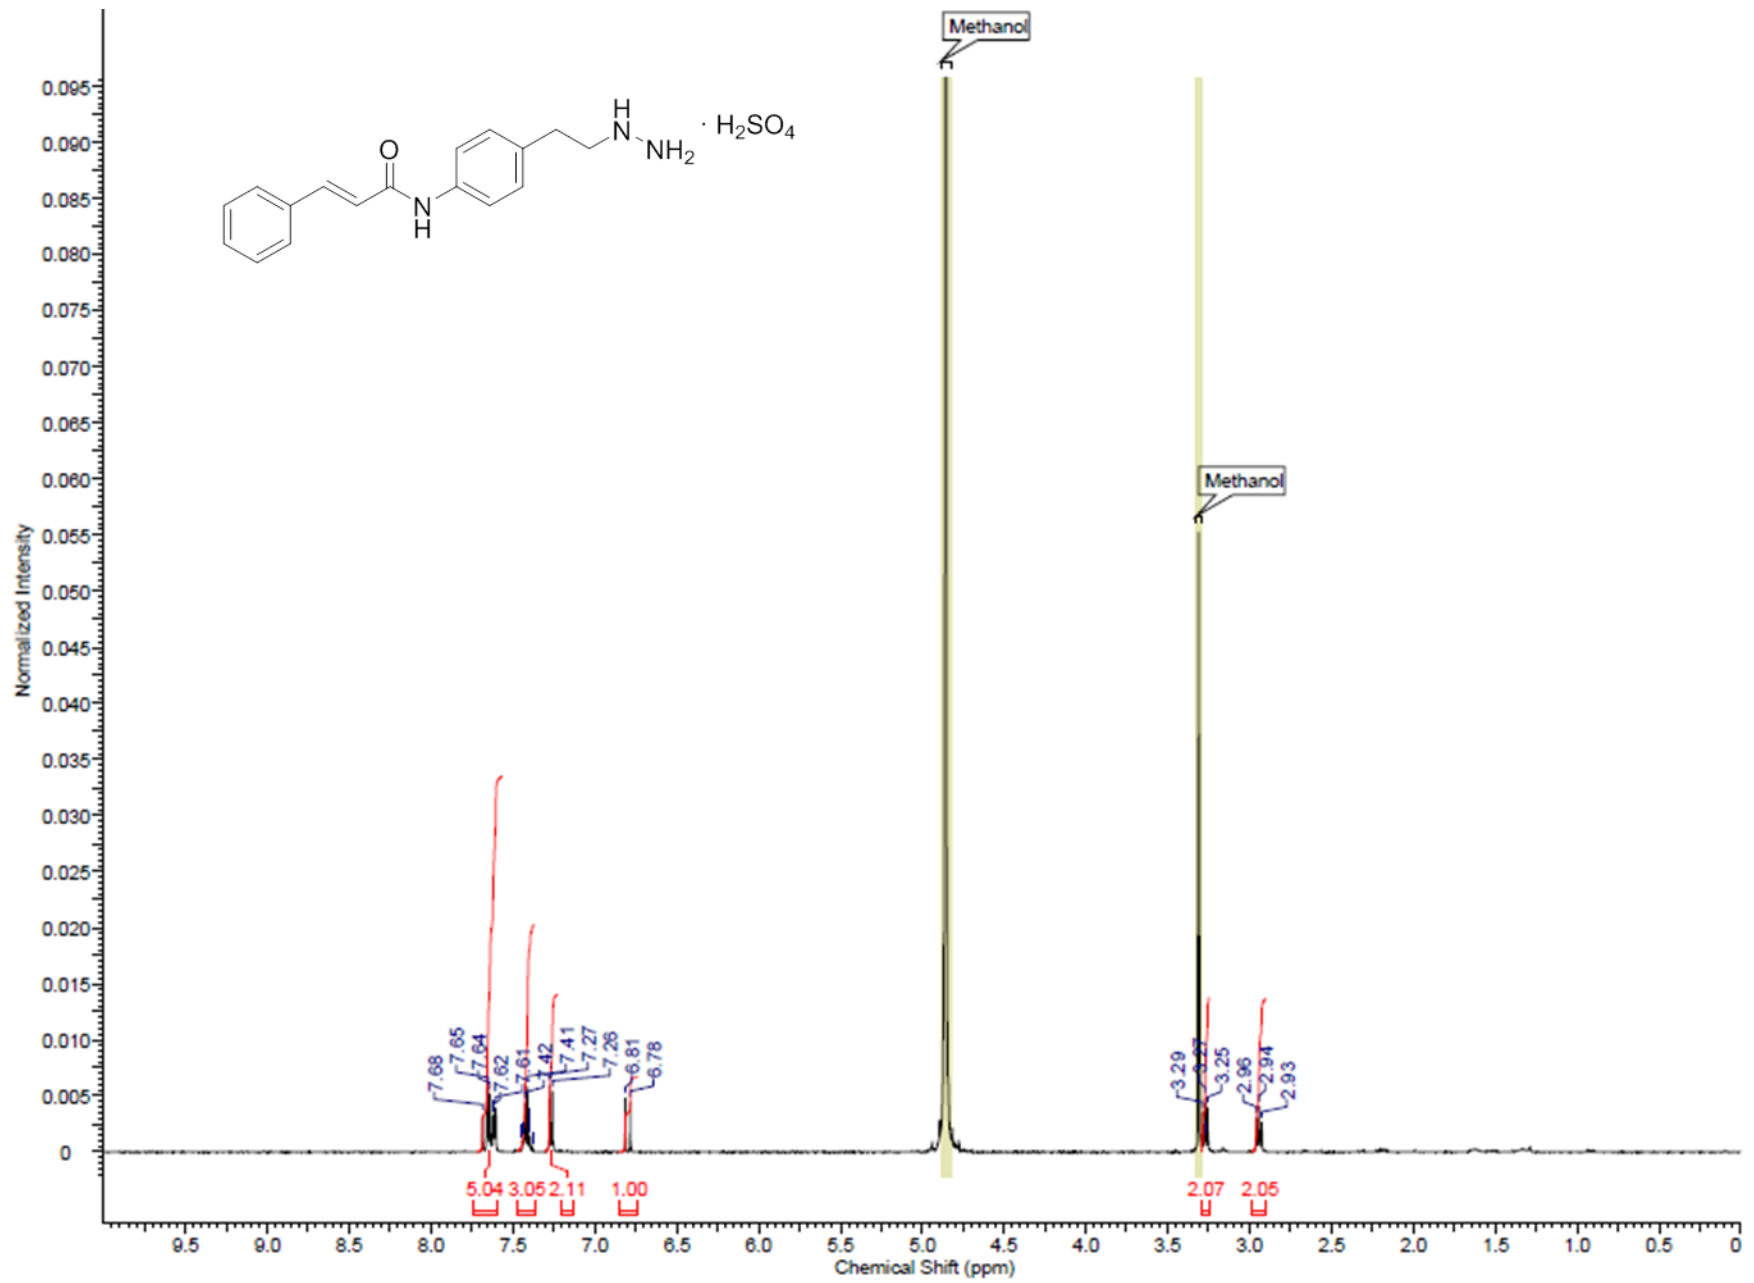

13 - <sup>13</sup>C NMR

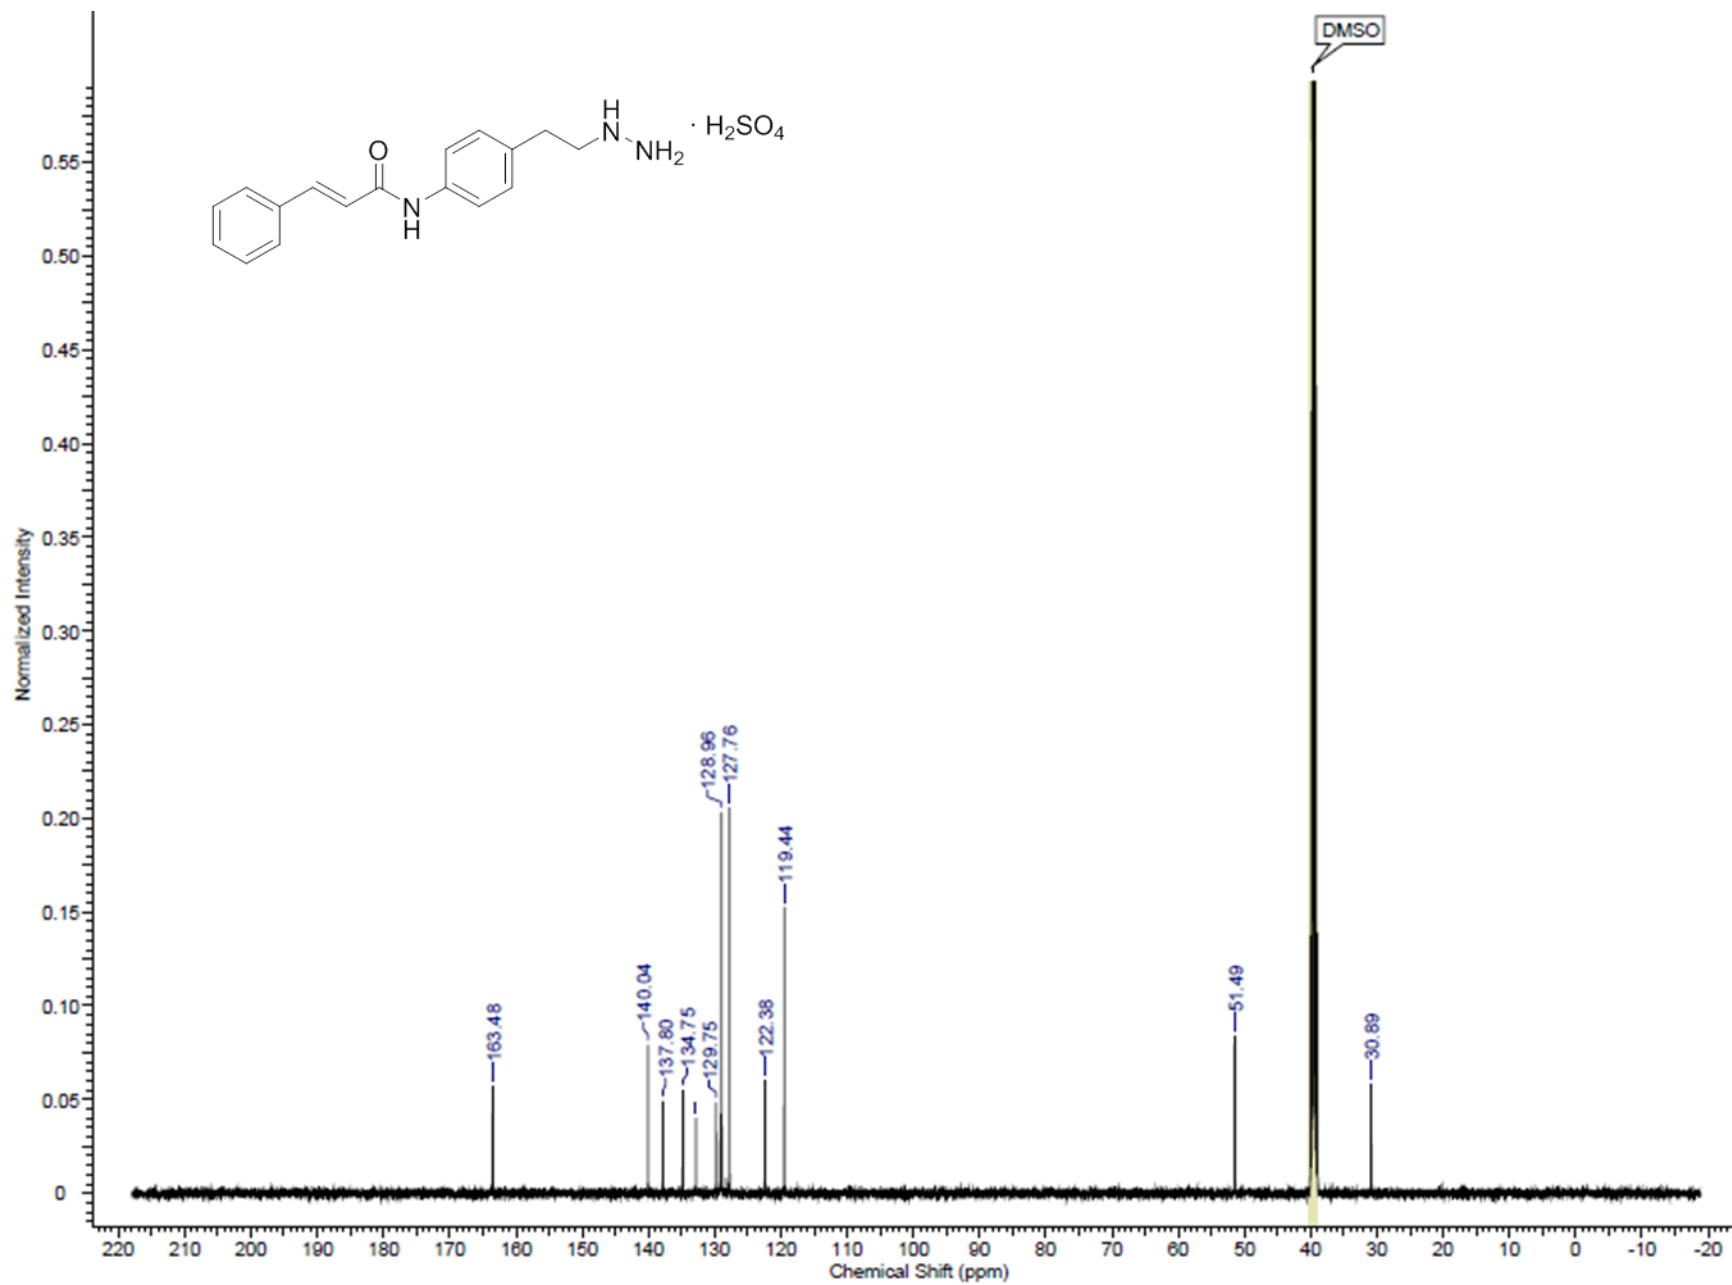

14 - <sup>1</sup>H NMR

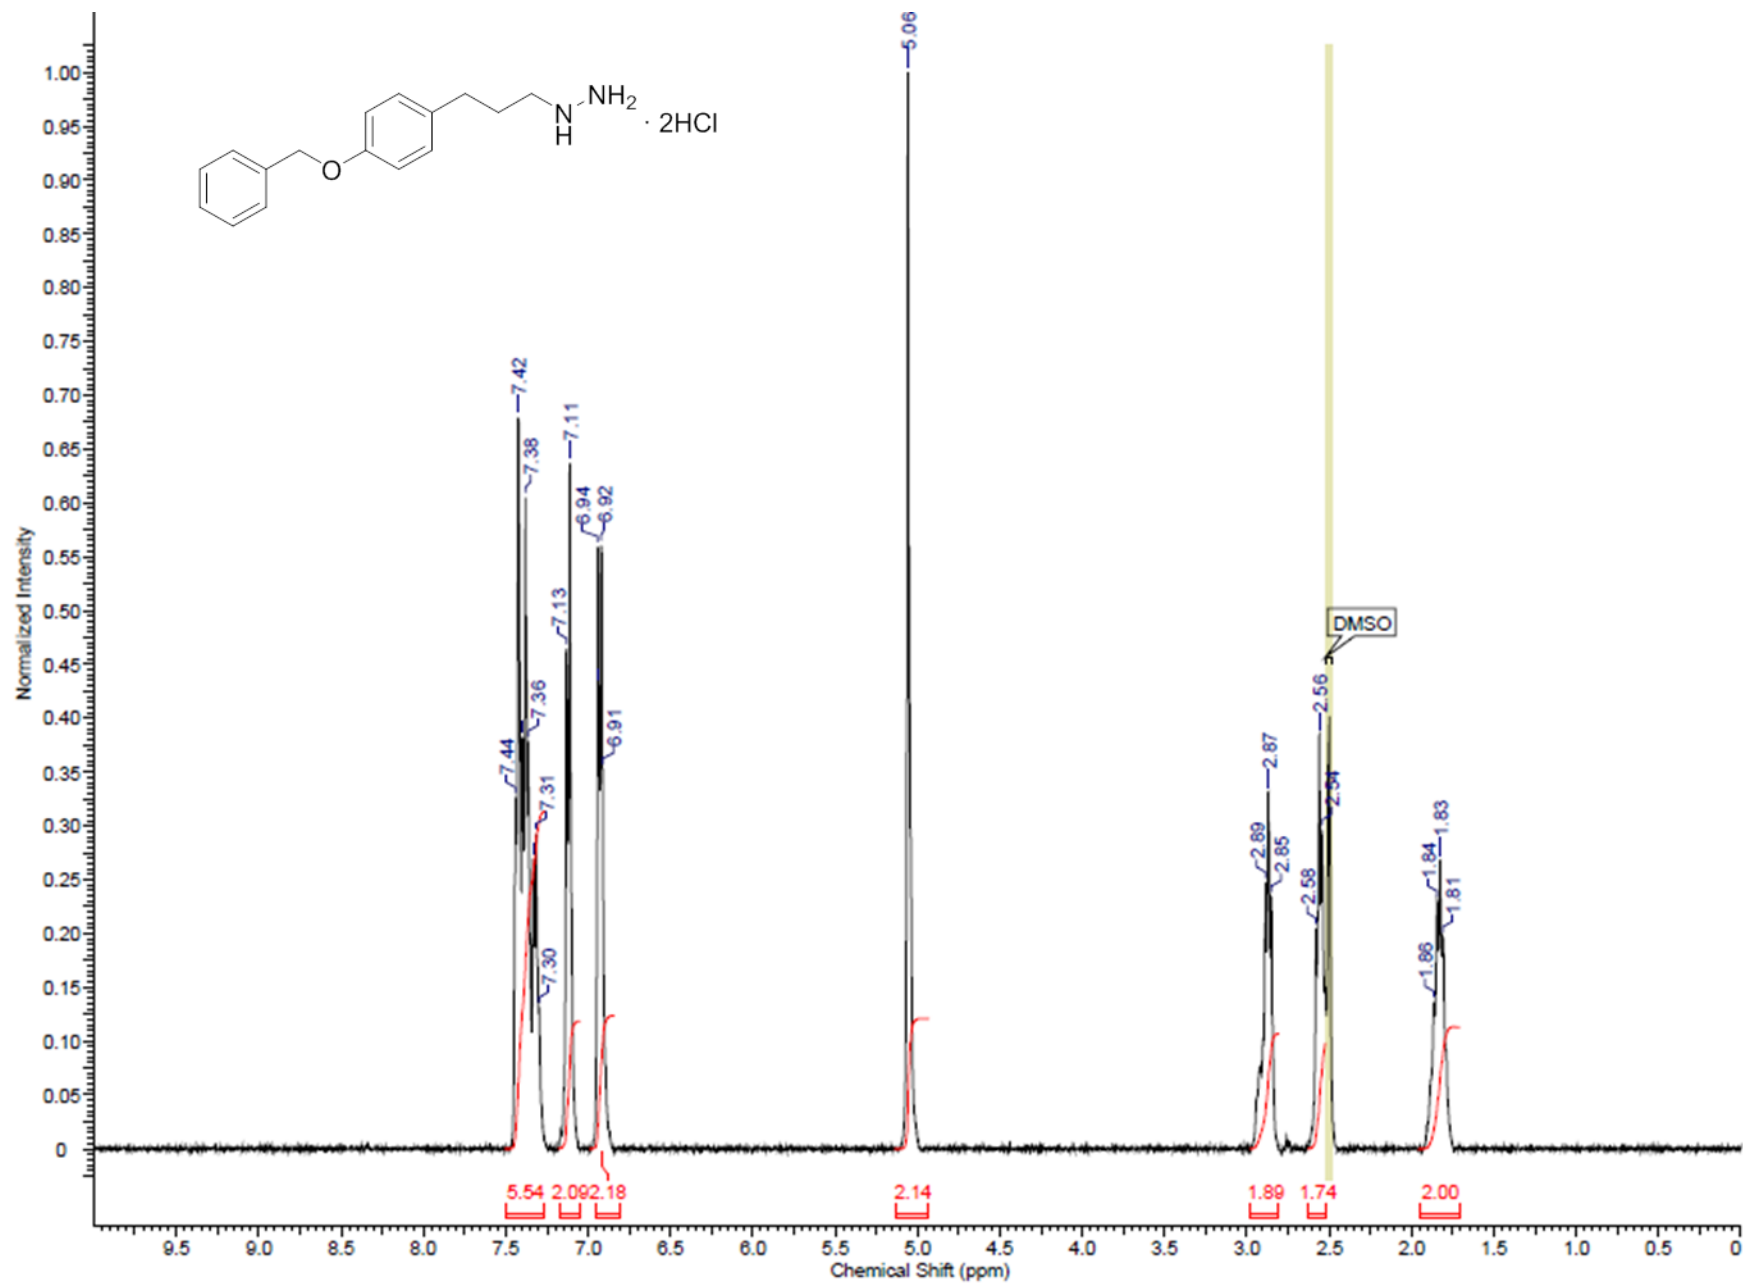

14 -  $^{13}\text{C}$  NMR

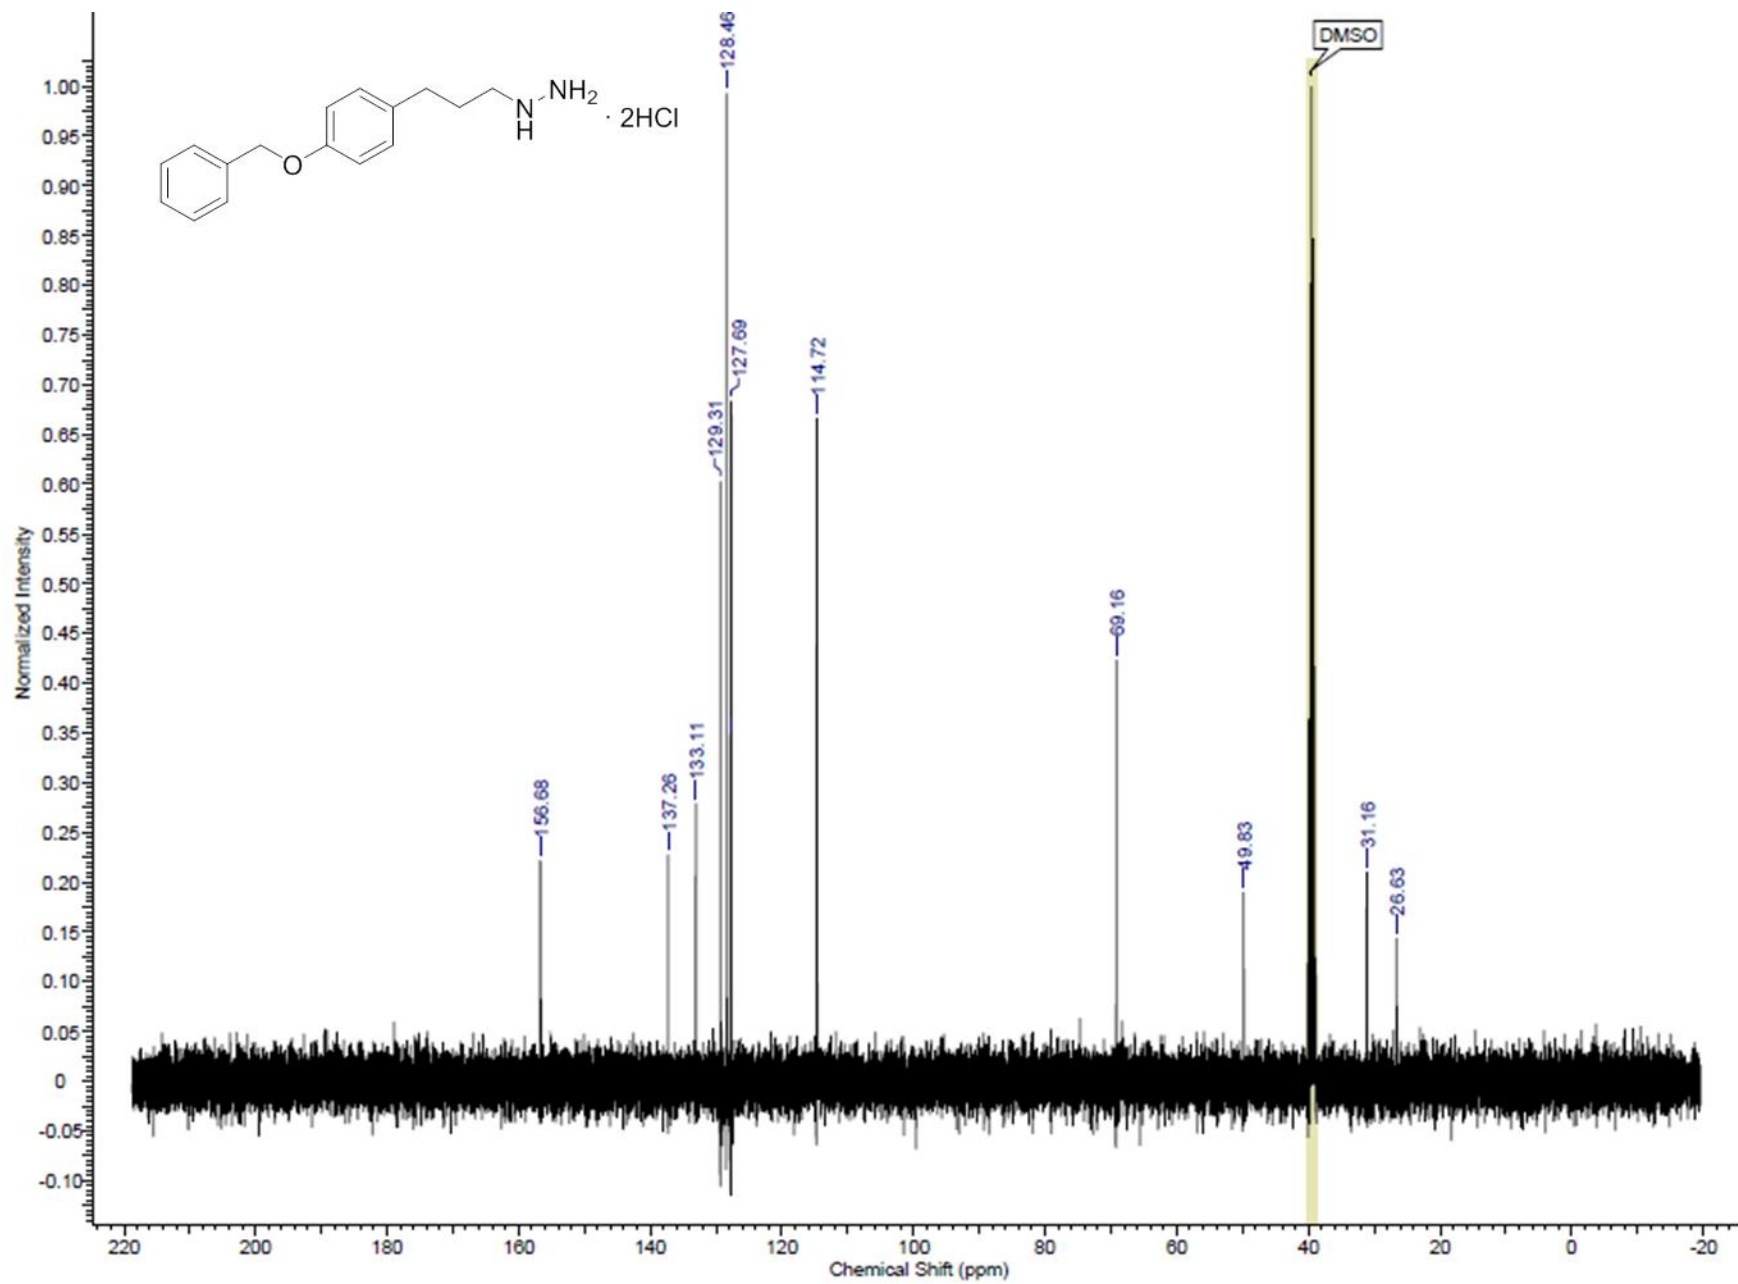



15a - <sup>1</sup>H NMR

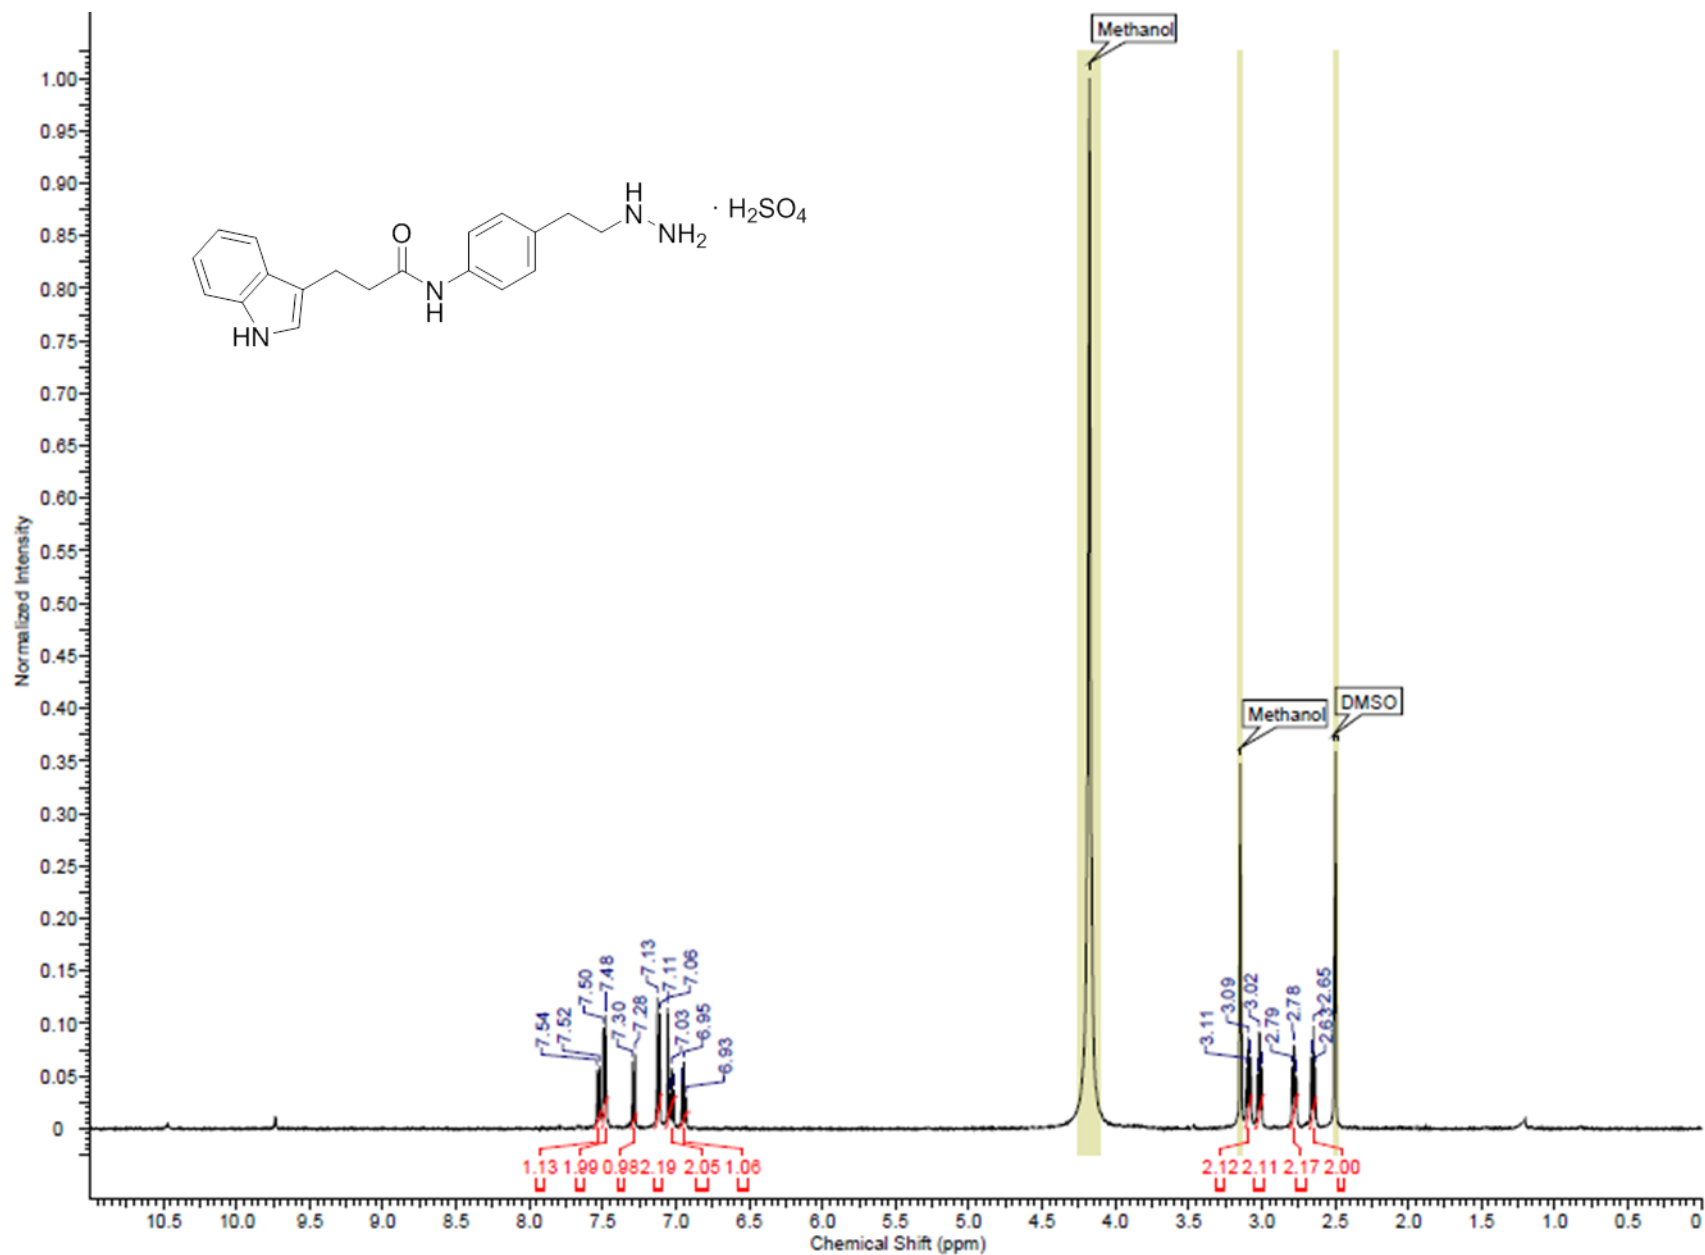

15a - <sup>13</sup>C NMR

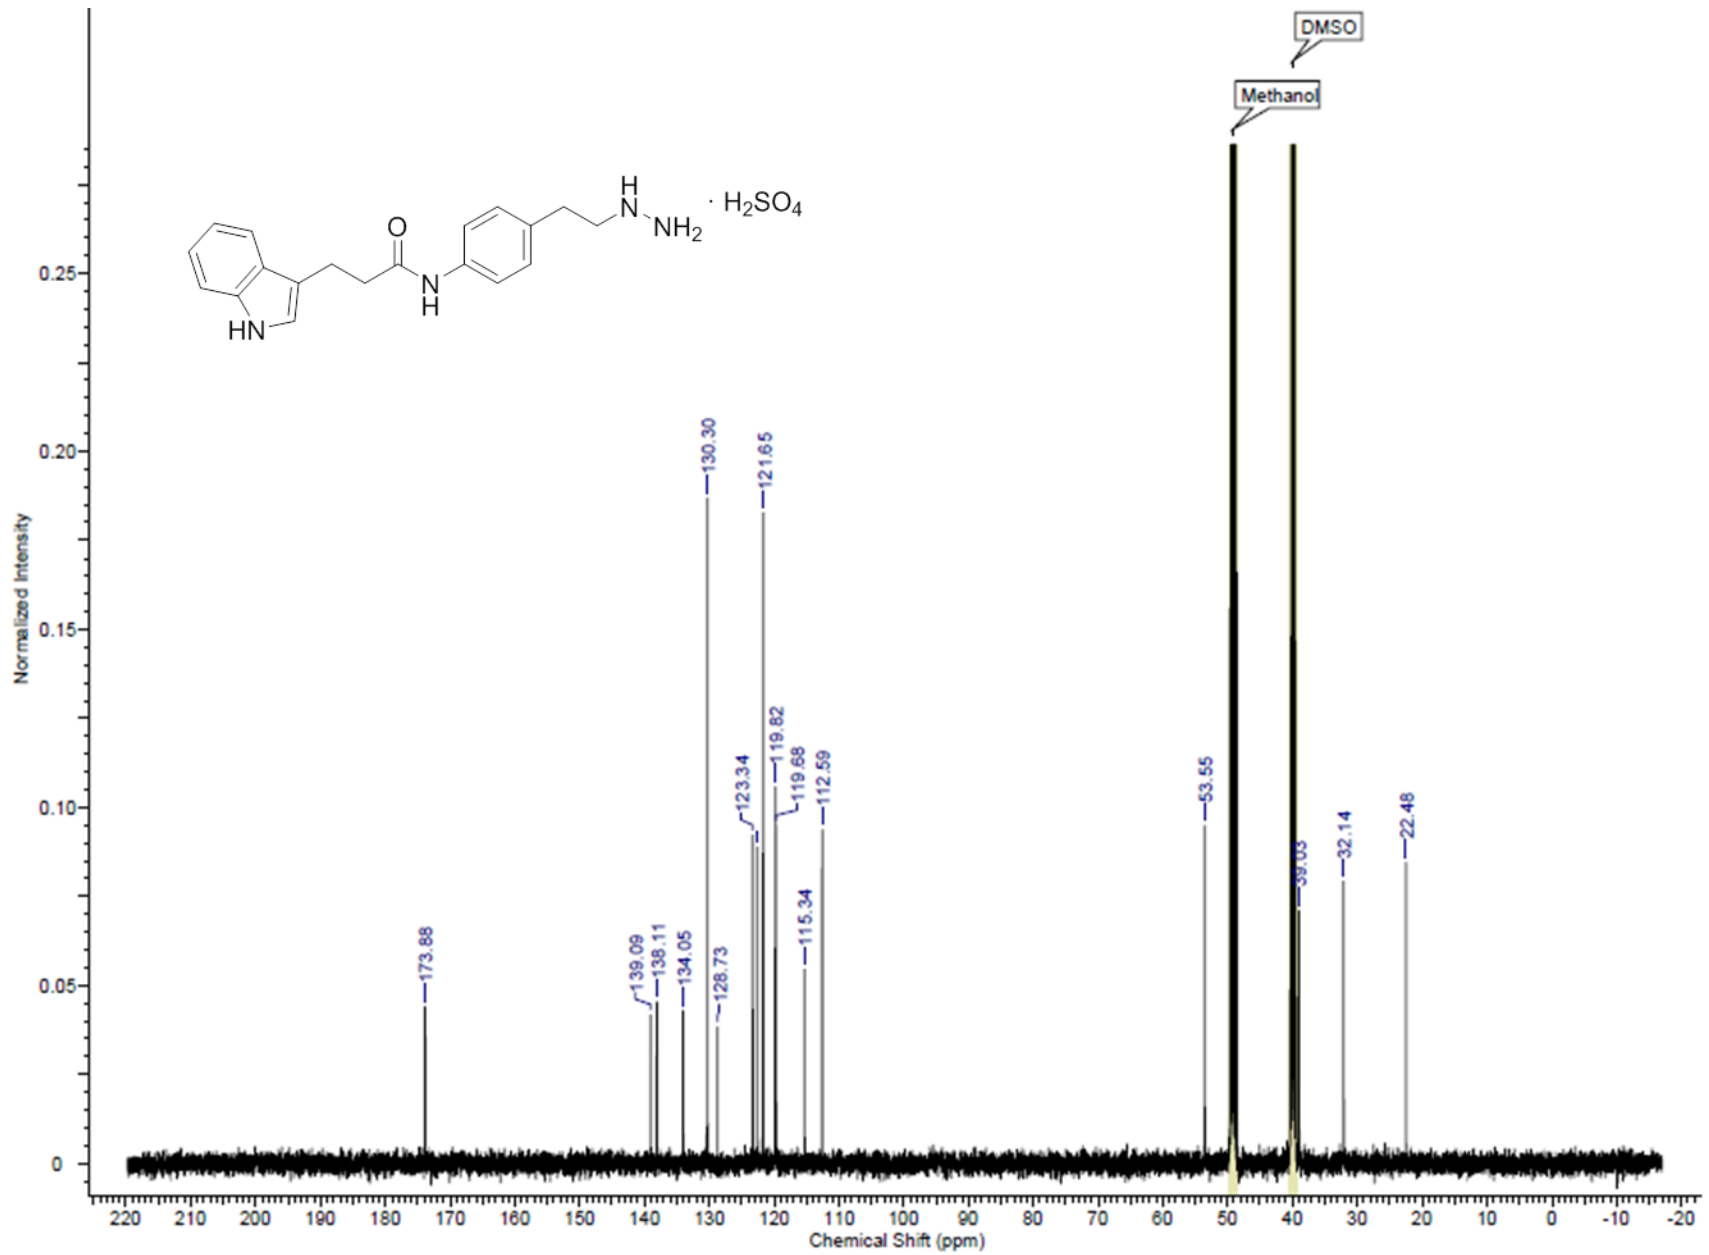

15b - <sup>1</sup>H-NMR

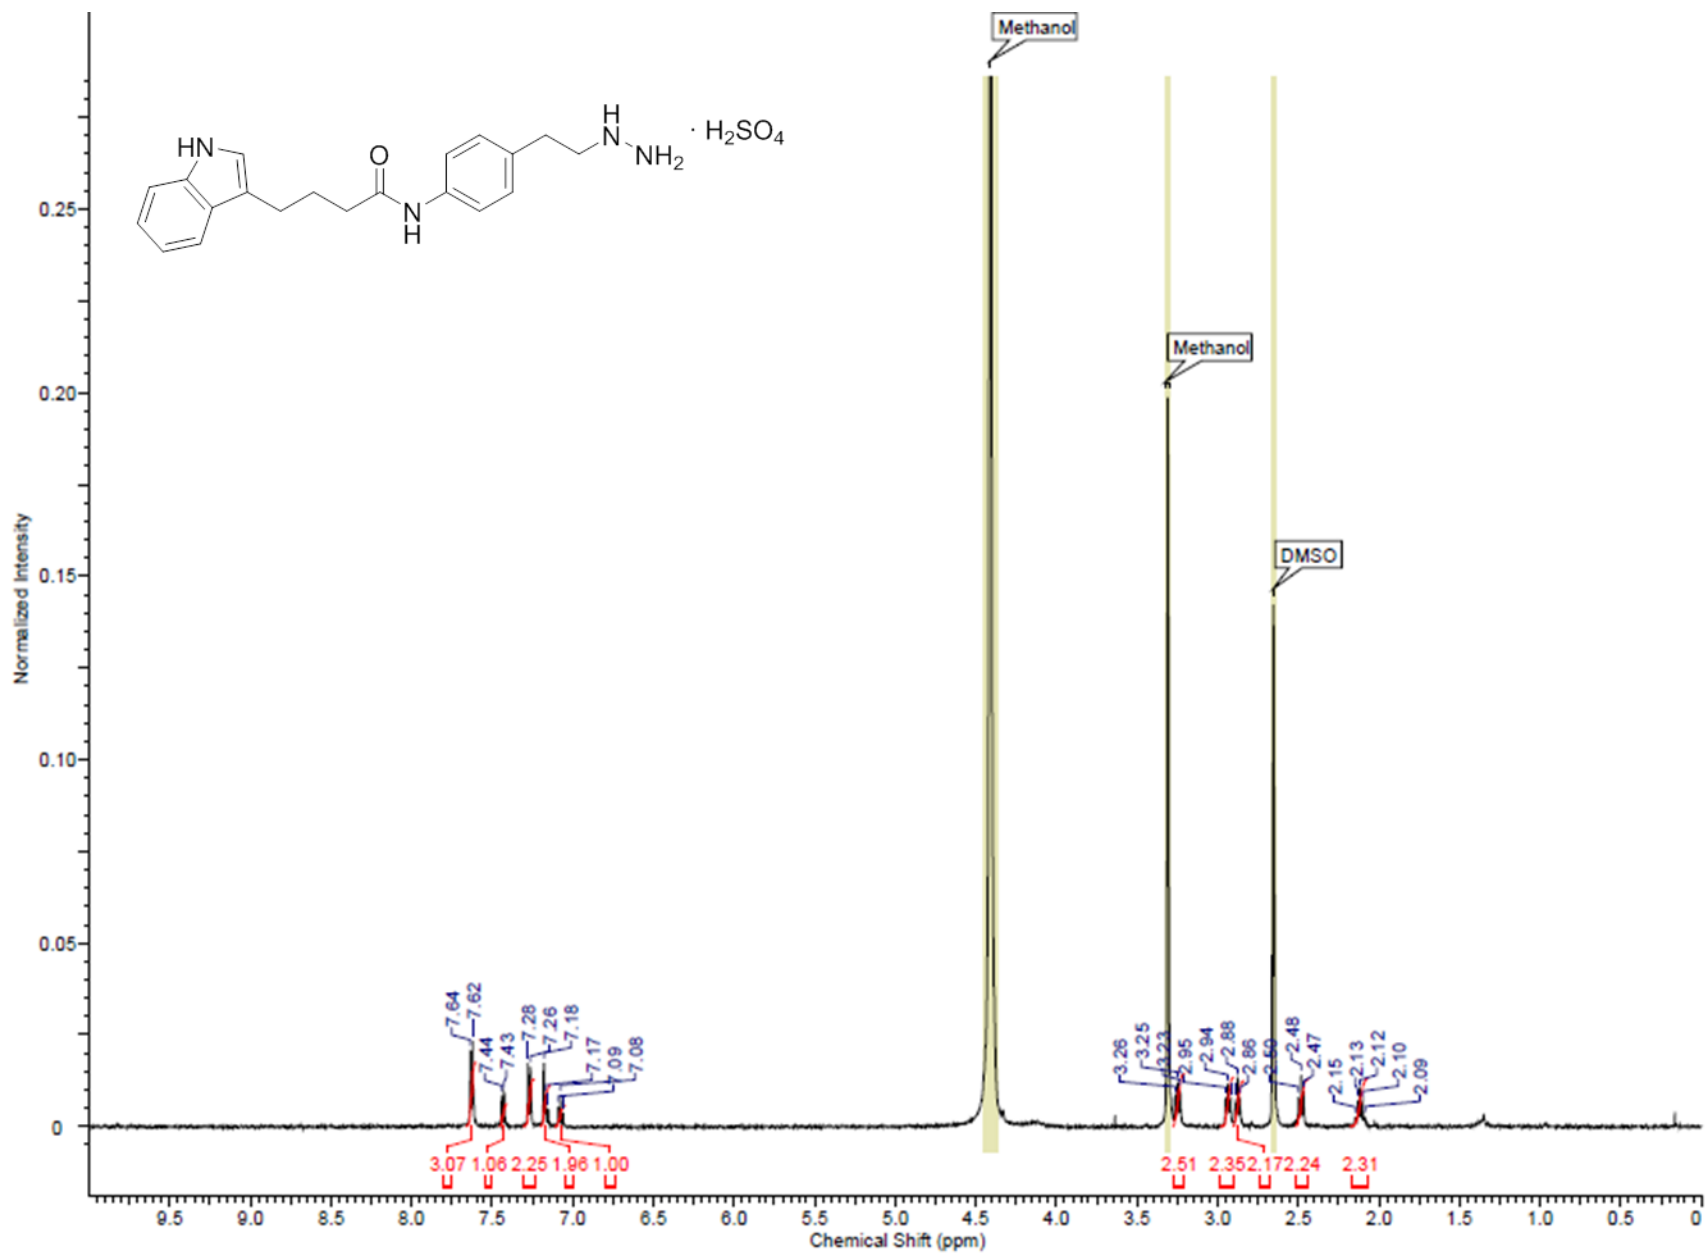

15b - <sup>13</sup>C-NMR

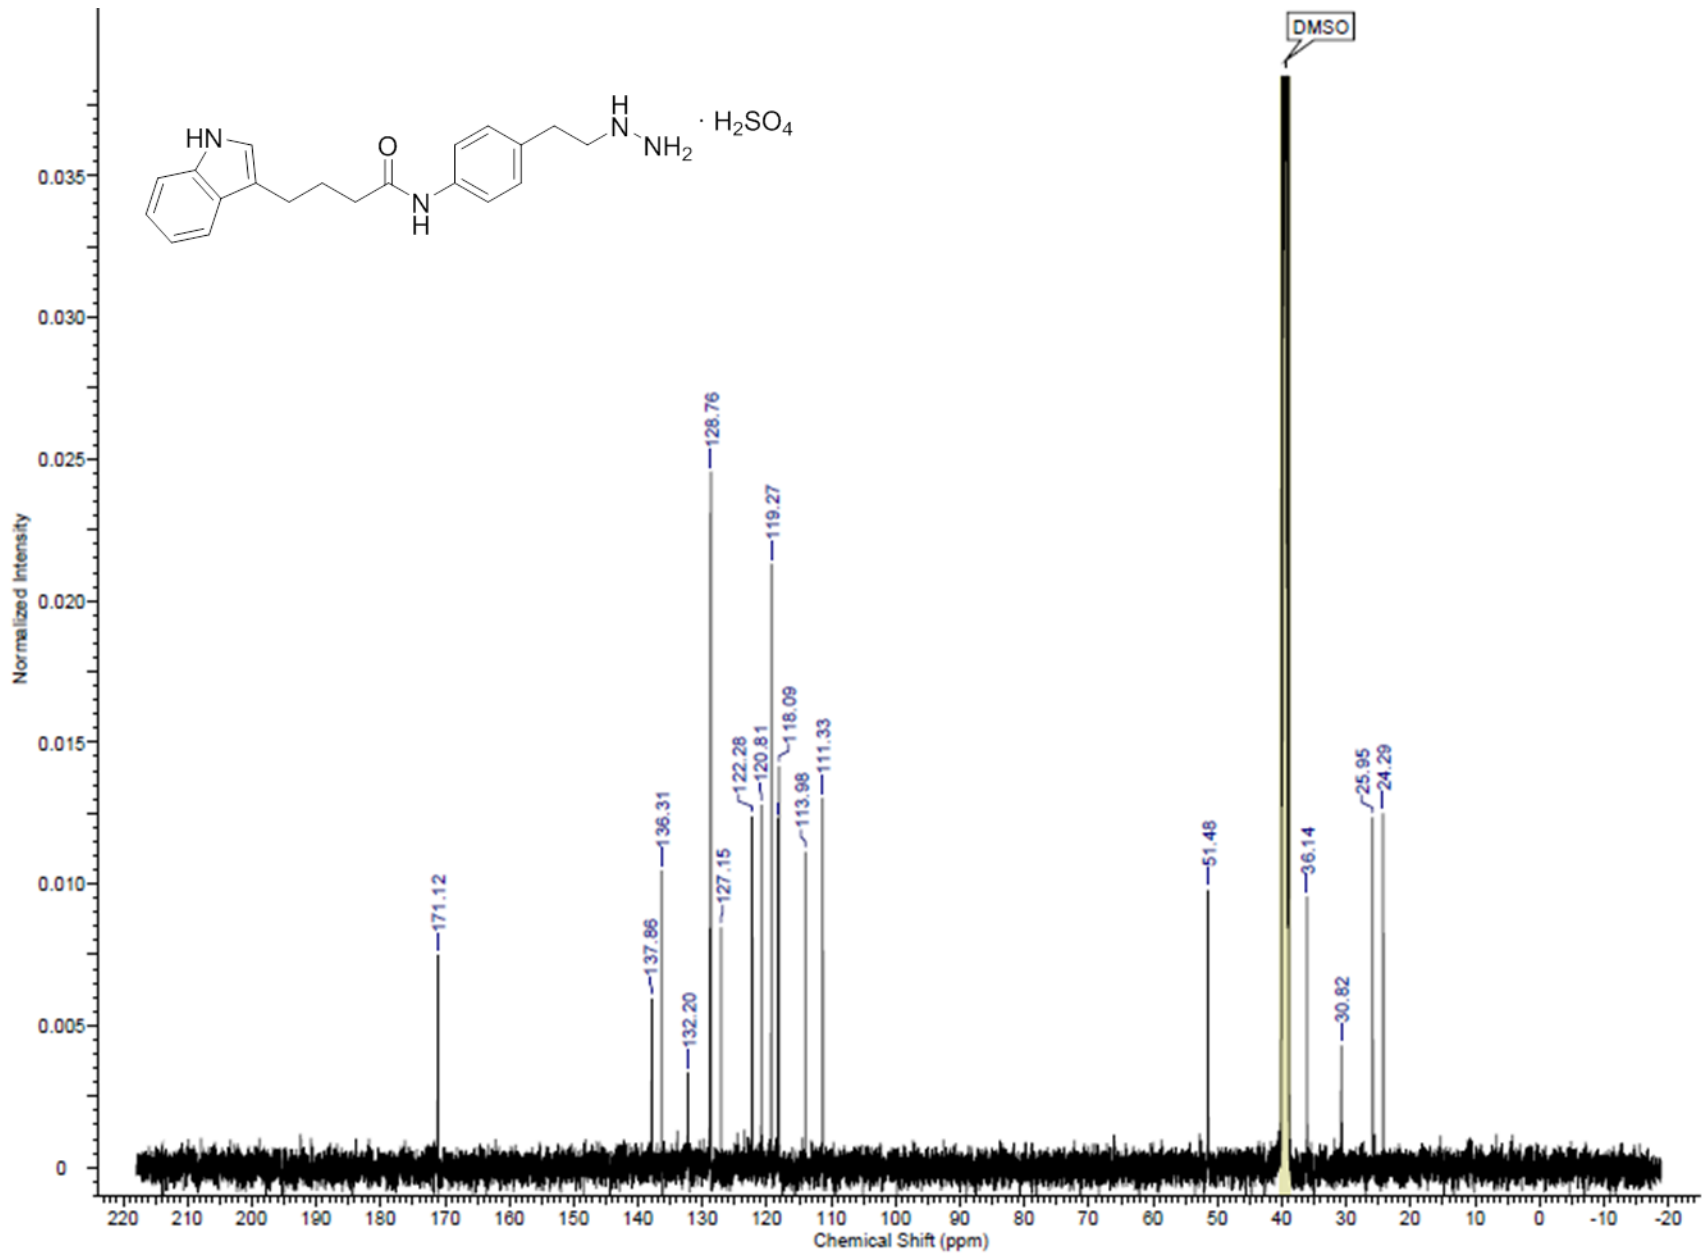

Supplement: cb500018s_si_003.pdf [file cb500018s_si_003.pdf]
